# Supplementary material for: -Omics biomarker identification pipeline for translational medicine
Source: Springer Nature journal article supplement (doi:10.1186/s12967-019-1912-5), 2019-05-14
Supplement: MOESM1 [file 16723538]

# Pancreatic Cancer Analysis

*Bravo, Williams, and Acharjee*

*19 Sept 2018*

```
#Libraries
```

```
##### Begin Block 1
```

```
setwd("~/AnimeshReview/LauraPaper/Journal of Translational Medicine /LauraFinal/")
library(readxl)
library(data.table)
library(tidyverse)
library(dplyr)
library(devtools)
library(ggcorrplot)
library(car)
library(ggpubr)
library(glmnet)
library(summarytools)
library(knitr)
library(htmltools)
library(corrplot)
library(caret)
library(factoextra)
library(Metrics)
library(readr)
library(gplots)
library(dplyr)
library(stringr)
library(readxl)
library(plotly)
library(e1071)
library(ggplot2)
library(reshape2)
library(multtest)
library(ROCR)
library(gridExtra)
library(MLmetrics)
```

```
#### Begin Load Laura's Functions
```

```
doubleAUCfun <- function(xtrain, ytrain, xtest, ytest, s, k) {

  yy3<-data.frame(Outcome=ytrain, Predictor=xtrain[,s],Predictor2=xtrain[,k])
  model3<-glm(Outcome~Predictor+Predictor2,data=yy3, family=binomial(link='logit'))
  new3<-data.frame(Predictor=xtest[,s],Predictor2=xtest[,k])
  p3<-predict(model3,new3,type="response")
  new5<-data.frame(Outcome=ytest)
  pr3 <- prediction(p3, new5)
```

```

prf3 <- performance(pr3, measure = "tpr", x.measure = "fpr")
auc3 <- performance(pr3, measure = "auc")
auc3 <- auc3@y.values[[1]]
result2<-auc3
}

doubleAUCfunNB <- function(xtrain, ytrain,xtest,ytest,s,k) {

  yy3<-data.frame(Outcome=ytrain, Predictor=xtrain[,s],Predictor2=xtrain[,k])
  model4<-naiveBayes(Outcome~Predictor+Predictor2,data=yy3)
  new4<-data.frame(Predictor=xtest[,s],Predictor2=xtest[,k])
  p4<-predict(model4,new4,type="raw")
  #without raw write confusion matrix directly
  prob2<-NULL
  for (i in 1:dim(p4)[1]){
    prob2[i]<-p4[i,2]/p4[i,1]
  }
  new5<-data.frame(Outcome=ytest)
  pr3 <- prediction(prob2, new5)
  prf3 <- performance(pr3, measure = "tpr", x.measure = "fpr")
  auc3 <- performance(pr3, measure = "auc")
  auc3 <- auc3@y.values[[1]]
  result2<-auc3
}

doubleAUCfunRFCross <- function(xtrain, ytrain,xtest,ytest,s,k) {

  yy3<-data.frame(Outcome=ytrain, Predictor=xtrain[,s],Predictor2=xtrain[,k])
  control <- trainControl(method="repeatedcv", number=10, repeats=3) #Is this the only thing needed f
  seed <- 7
  metric <- "Accuracy"
  set.seed(seed)
  #mtry <- 2
  tuneGrid <- expand.grid(.mtry=c(1:6))
  set.seed(seed)
  rf_default <- train(Outcome~Predictor+Predictor2,data=yy3, method="rf", metric=metric, tuneGrid=tune
  #print(rf_default)
  new4<-data.frame(Predictor=xtest[,s],Predictor2=xtest[,k])
  pred=predict(rf_default, new4,type="prob")
  pred2=predict(rf_default, new4)
  prob2<-NULL
  for (i in 1:dim(pred)[1]){
    prob2[i]<-pred[i,2]/pred[i,1]
  }
  new5<-data.frame(Outcome=ytest)
  pr3 <- prediction(prob2, new5)
  prf3 <- performance(pr3, measure = "tpr", x.measure = "fpr")
  auc3 <- performance(pr3, measure = "auc")
  auc3 <- auc3@y.values[[1]]
  result2<-auc3
}

```

```

doubleAUCfunSVM <- function(xtrain, ytrain,xtest,ytest,s,k) {

  yy3<-data.frame(Outcome=ytrain, Predictor=xtrain[,s],Predictor2=xtrain[,k])
  seed <- 7
  set.seed(seed)
  model3<-svm(Outcome~Predictor+Predictor2,data=yy3)
  new3<-data.frame(Predictor=xtest[,s],Predictor2=xtest[,k])
  p3<-predict(model3,new3,decision.values = TRUE)
  p4<-attr(p3,"decision.values")
  new5<-data.frame(Outcome=ytest)
  pr3<- prediction(p4, new5)
  #table(p3, new5)
  #confusionMatrix(p3, new5)
  prf3 <- performance(pr3, measure = "tpr", x.measure = "fpr")
  auc3 <- performance(pr3, measure = "auc")
  auc3 <- auc3@y.values[[1]]
  result2<-auc3
}

doubleAUCfunSVMCross <- function(xtrain, ytrain,xtest,ytest,s,k) {

  yy3<-data.frame(Outcome=ytrain, Predictor=xtrain[,s],Predictor2=xtrain[,k])
  seed <- 7
  set.seed(seed)
  model4<-svm(Outcome~Predictor+Predictor2,data=yy3,method="C-classification",
              kernel="radial", gamma = 0.01, cost = 100,cross=10, probability=TRUE)
  new4<-data.frame(Predictor=xtest[,s],Predictor2=xtest[,k])
  p4<-predict(model4,new4,decision.values = TRUE)
  p5<-attr(p4,"decision.values")
  new5<-data.frame(Outcome=ytest)
  pr3 <- prediction(p5, new5)
  prf3 <- performance(pr3, measure = "tpr", x.measure = "fpr")
  auc3 <- performance(pr3, measure = "auc")
  auc3 <- auc3@y.values[[1]]
  result2<-auc3
}

doublePlusfun <- function(xtrain, ytrain,xtest,ytest,s,k) {

  yy3<-data.frame(Outcome=ytrain, Predictor=xtrain[,s],Predictor2=xtrain[,k])
  model3<-glm(Outcome~Predictor+Predictor2,data=yy3, family=binomial(link='logit'))
  new3<-data.frame(Predictor=xtest[,s],Predictor2=xtest[,k])
  p3<-predict(model3,new3,type="response")
  new5<-data.frame(Outcome=ytest)
  pr <- prediction(p3, new5)
  Acc <- performance(pr, measure="acc")
  AccV<-Acc@y.values[[1]][max(which(Acc@x.values[[1]] >= 0.5))]
  Sens <- performance(pr, measure= "sens")
  SensV<-Sens@y.values[[1]][max(which(Sens@x.values[[1]] >= 0.5))]
  Spec <- performance(pr, measure= "spec")
  SpecV<-Spec@y.values[[1]][max(which(Spec@x.values[[1]] >= 0.5))]
  Prec <- performance(pr, measure= "prec")
  PrecV<-Prec@y.values[[1]][max(which(Prec@x.values[[1]] >= 0.5))]
}

```

```

AllV<-data.frame(Vector=c(AccV, SensV, SpecV, PrecV))
return(AllV)
}

doubleROCfun <- function(xtrain, ytrain,xtest,ytest,s,k) {

yy3<-data.frame(Outcome=ytrain, Predictor=xtrain[,s],Predictor2=xtrain[,k])
model3<-glm(Outcome~Predictor+Predictor2,data=yy3, family=binomial(link='logit'))
new3<-data.frame(Predictor=xtest[,s],Predictor2=xtest[,k])
p3<-predict(model3,new3,type="response")
new5<-data.frame(Outcome=ytest)
pr3 <- prediction(p3, new5)
prf3 <- performance(pr3, measure = "tpr", x.measure = "fpr")
result<-prf3
auc3 <- performance(pr3, measure = "auc")
auc3 <- auc3@y.values[[1]]
return(result)

}

MeansNames <- function(doubleAUCR,trial){

doubleAUCR<-as.data.frame(doubleAUCR)
doubleAUCR<-mutate(doubleAUCR, Means=rowMeans(doubleAUCR))
row.names(doubleAUCR)<-trial
return(doubleAUCR)

}

multipleAUCfun <- function(xtrain,ytrain,xtest,ytest) {

yy3<-data.frame(Outcome=ytrain,xtrain)
model3<-glm(Outcome~.,data=yy3, family=binomial(link='logit'))
new3<-data.frame(xtest)
p3<-predict(model3,new3,type="response")
new5<-data.frame(Outcome=ytest)
pr3 <- prediction(p3, new5)
prf3 <- performance(pr3, measure = "tpr", x.measure = "fpr")
auc3 <- performance(pr3, measure = "auc")
auc3 <- auc3@y.values[[1]]
result2<-auc3
return(result2)

}

multipleAUCfunNB <- function(xtrain, ytrain,xtest,ytest) {

yy3<-data.frame(Outcome=ytrain,xtrain)
model4<-naiveBayes(Outcome~.,data=yy3)
new3<-data.frame(xtest)
p4<-predict(model4,new3,type="raw")
#without raw write confusion matrix directly
prob2<-NULL
for (i in 1:dim(p4)[1]){
prob2[i]<-p4[i,2]/p4[i,1]
}
}

```

```

}
new5<-data.frame(Outcome=ytest)
pr3 <- prediction(prob2, new5)
prf3 <- performance(pr3, measure = "tpr", x.measure = "fpr")
auc3 <- performance(pr3, measure = "auc")
auc3 <- auc3@y.values[[1]]
result2<-auc3
return(result2)
}

multipleROCfun <- function(xtrain,ytrain,xtest,ytest) {

yy3<-data.frame(Outcome=ytrain,xtrain)
model3<-glm(Outcome~.,data=yy3, family=binomial(link='logit'))
new3<-data.frame(xtest)
p3<-predict(model3,new3,type="response")
new5<-data.frame(Outcome=ytest)
pr3 <- prediction(p3, new5)
prf3 <- performance(pr3, measure = "tpr", x.measure = "fpr")
auc3 <- performance(pr3, measure = "auc")
auc3 <- auc3@y.values[[1]]
result2<-auc3
return(prf3)
}

multipleROCfunNB <- function(xtrain, ytrain,xtest,ytest) {

yy3<-data.frame(Outcome=ytrain,xtrain)
model4<-naiveBayes(Outcome~.,data=yy3)
new3<-data.frame(xtest)
p4<-predict(model4,new3,type="raw")
#without raw write confusion matrix directly
prob2<-NULL
for (i in 1:dim(p4)[1]){
  prob2[i]<-p4[i,2]/p4[i,1]
}
new5<-data.frame(Outcome=ytest)
pr3 <- prediction(prob2, new5)
prf3 <- performance(pr3, measure = "tpr", x.measure = "fpr")
auc3 <- performance(pr3, measure = "auc")
auc3 <- auc3@y.values[[1]]
result2<-auc3
return(prf3)
}

singleAUCfun <- function(xtrain, ytrain,xtest,ytest,s) {

yy2<-data.frame(Outcome=ytrain, Predictor=xtrain[,s])
model2<-glm(Outcome~Predictor,data=yy2,family=binomial(link='logit'))
new2<-data.frame(Predictor=xtest[,s])
p<-predict(model2,new2,type = "response")
new4<-data.frame(Outcome=ytest)

```

```

pr <- prediction(p, new4)
prf <- performance(pr, measure = "tpr", x.measure = "fpr")
auc <- performance(pr, measure = "auc")
auc <- auc@y.values[[1]]
return(auc)
}

singlePlusfun <- function(xtrain, ytrain,xtest,ytest,s) {

yy2<-data.frame(Outcome=ytrain, Predictor=xtrain[,s])
model2<-glm(Outcome~Predictor,data=yy2,family=binomial(link='logit'))
new2<-data.frame(Predictor=xtest[,s])
p<-predict(model2,new2,type = "response")
new4<-data.frame(Outcome=ytest)
pr <- prediction(p, new4)
Acc <- performance(pr, measure="acc")
AccV<-Acc@y.values[[1]][max(which(Acc@x.values[[1]] >= 0.5))]
Sens <- performance(pr, measure= "sens")
SensV<-Sens@y.values[[1]][max(which(Sens@x.values[[1]] >= 0.5))]
Spec <- performance(pr, measure= "spec")
SpecV<-Spec@y.values[[1]][max(which(Spec@x.values[[1]] >= 0.5))]
Prec <- performance(pr, measure= "prec")
PrecV<-Prec@y.values[[1]][max(which(Prec@x.values[[1]] >= 0.5))]
AllV<-data.frame(Vector=c(AccV, SensV, SpecV, PrecV))
return(AllV)
}

singleROCFun <- function(xtrain, ytrain,xtest,ytest,s) {

yy2<-data.frame(Outcome=ytrain, Predictor=xtrain[,s])
model2<-glm(Outcome~Predictor,data=yy2,family=binomial(link='logit'))
new2<-data.frame(Predictor=xtest[,s])
p<-predict(model2,new2,type = "response")
new4<-data.frame(Outcome=ytest)
pr <- prediction(p, new4)
prf <- performance(pr, measure = "tpr", x.measure = "fpr")
resultU2<-prf
tomeany<-as.data.frame(prf@y.values)
tomeanx<-as.data.frame(prf@x.values)
auc <- performance(pr, measure = "auc")
auc <- auc@y.values[[1]]
return(resultU2)
}

set.seed(132)

```

```

### Load Pancreatic Cancer Dta
setwd("/Users/j.williams/AnimeshReview/LauraPaper/Journal of Translational Medicine /LauraFinal/Sept18_1
All12 <- readRDS("All2.Pancreatic.rds"); savee <- readRDS("savee.Pancreatic.rds")

#TRAIN

### set n to 10 for now to make quicker
n<-100 #Number of LASSO and EN loops. Per loop a model with features selected. The 80% most popular fea

#N and nn control the number of models created for combinatorial analysis to help in further feature se
N <-10
nn <-25

ErrorsFinEN<-vector(mode="double", length=n)
BetasFinEN<-vector(mode="character", length=n)
LambdaFinEN<-vector(mode="double", length=n)
BNumFinEN<-vector(mode="double", length=n)
see2EN<-data.frame(All="All")
LauCoef1<-data.frame(Coeff="See",stringsAsFactors=FALSE)
BetasTodo<-data.frame(Features="Name",Coefficients=1)

ListError<-vector(mode="double", length=n)
BetasFin<-vector(mode="character", length=n)
LambdaFin<-vector(mode="double", length=n)
BNumFin<-vector(mode="double", length=n)
see2<-data.frame(All="All")
LauCoef1L<-data.frame(Coeff="See",stringsAsFactors=FALSE)
BetasTodoL<-data.frame(Features="Name",Coefficients=1)

##### End Block 1

##### Begin Block 2

for (i in 1:n){

  smp_size = floor(0.75 * nrow(All12))

  train_ind <- caret::createDataPartition(All12$Label, p = 0.75, list = FALSE, times = 1)

  #Training set
  train = All12[train_ind, ]

  #Test set
  test = All12[-train_ind, ]

  #Creates matrices for independent and dependent variables.
  xtrain <- train[ , !(names(train) %in% "Label")] %>% as.matrix()
  ytrain = train$Label

```

```

xtest <- test[ , !(names(test) %in% "Label")] %>% as.matrix()
ytest = test$Label

#Choose lambda value that minimize missclassification error.
#0.5 as elastic nets, all variables with EN are based on ElasticNets analysis. 100 lambdas sampled with
CVEN=cv.glmnet(xtrain,ytrain,family="binomial",type.measure="class",alpha=0.5,nlambda=100)
attach(CVEN)
Lambda.BestEN<-CVEN$lambda.min #can be either minimum or 1 standard deviation
print(Lambda.BestEN)

CVFinEN=glmnet(xtrain,ytrain,family="binomial",alpha=0.5,lambda=Lambda.BestEN)
CoefEN<-coef(CVFinEN) #Beta coefficients obtained from here
InterceptEN<-CoefEN@x[1]
BetasEN<-CVFinEN$beta
Betas2EN<-data.frame(Features=BetasEN@Dimnames[[1]][BetasEN@i+1], Coefficients=BetasEN@x) #Beta coefficient
CVPred1EN = predict(CVFinEN, family="binomial", s=Lambda.BestEN, newx = xtest,type="class") #predict

#Calculate error for categorical values
ytest2<-as.factor(ytest)
ResultsEN<-table(CVPred1EN,ytest)
confusionMatrix(as.factor(CVPred1EN),ytest)
AccuracyEN<-(ResultsEN[1]+ResultsEN[4])/sum(ResultsEN[1:4])
ErrorEN<-1-AccuracyEN

LauCoef<-Betas2EN$Coefficients
LauCoefEN<-data.frame(Coeff=LauCoef,stringsAsFactors=FALSE)
LauCoef1<-rbind(LauCoef1,LauCoefEN)
BetasTodo<-rbind(BetasTodo,Betas2EN) #store coefficients and store betas

seeEN<-Betas2EN$Features
seeEN1<-data.frame(All=seeEN)
see2EN<-rbind(see2EN,seeEN1) #all beta names stored

mEN<-count(see2EN, All) #frequency of the betas stored counted
see3EN<-toString(seeEN)
ErrorsFinEN[i]<-ErrorEN #error of the model stored
BetasFinEN[i]<-see3EN #name of features the model used
BNumFinEN[i]<-length(seeEN) #number of features the model used
LambdaFinEN[i]<-Lambda.BestEN #lambda chosen for model
detach(CVEN)

#Change between Lasso and EN, alpha=1 (*)
CV=cv.glmnet(xtrain,ytrain,family="binomial",type.measure="class",alpha=1,nlambda=100)

attach(CV)

Lambda.Best<-CV$lambda.min
CVFin=glmnet(xtrain,ytrain,family="binomial",alpha=1,lambda=Lambda.Best)
Coef<-coef(CVFin)
Intercept<-Coef@x[1]
Betas<-CVFin$beta

```



```

Betas2<-data.frame(Features=Betas@Dimnames[[1]][Betas@i+1], Coefficients=Betas@x)
CVPred1 = predict(CVFin, family="binomial", s=Lambda.Best, newx = xtest,type="class")

#Calculate error for categorical values
ytest2<-as.factor(ytest)
confusionMatrix(as.factor(CVPred1),ytest)
Results<-table(CVPred1,ytest)
Accuracy<-(Results[1]+Results[4])/sum(Results[1:4])
Error<-1-Accuracy

#visual display of for

BetasTodoL<-rbind(BetasTodoL,Betas2)
see<-Betas2$Features
see1<-data.frame(All=see)
see2<-rbind(see2,see1)
m<-count(see2, All)

see3<-toString(see)
ListError[i]<-Error
BetasFin[i]<-see3
BNumFin[i]<-length(see)
LambdaFin[i]<-Lambda.Best
detach(CV)
}

```

```

## [1] 0.6689277
## [1] 0.6303686
## [1] 0.7294298
## [1] 0.2883708
## [1] 0.4733006
## [1] 0.5943159
## [1] 0.235993
## [1] 0.6584265
## [1] 0.1317309
## [1] 0.395802
## [1] 0.6748829
## [1] 0.6907273
## [1] 0.4808845
## [1] 0.2339522
## [1] 0.6926208
## [1] 0.4017377
## [1] 0.6815938
## [1] 0.3682275
## [1] 0.6878564
## [1] 0.5334466
## [1] 0.25522
## [1] 0.7062928
## [1] 0.5021274
## [1] 0.2454332
## [1] 0.3415769
## [1] 0.1445318

```

## [1] 0.2492792  
## [1] 0.7286193  
## [1] 0.4040431  
## [1] 0.5608647  
## [1] 0.4575239  
## [1] 0.639378  
## [1] 0.1181126  
## [1] 0.194737  
## [1] 0.1059382  
## [1] 0.4479945  
## [1] 0.3634272  
## [1] 0.4787447  
## [1] 0.5555517  
## [1] 0.5364108  
## [1] 0.1343051  
## [1] 0.4800724  
## [1] 0.3865033  
## [1] 0.6247686  
## [1] 0.2318932  
## [1] 0.1884252  
## [1] 0.6696531  
## [1] 0.5132077  
## [1] 0.502099  
## [1] 0.629618  
## [1] 0.06499661  
## [1] 0.6696552  
## [1] 0.3857286  
## [1] 0.2742923  
## [1] 0.2977953  
## [1] 0.607225  
## [1] 0.2129634  
## [1] 0.4963329  
## [1] 0.4782131  
## [1] 0.2843202  
## [1] 0.3724457  
## [1] 0.4973665  
## [1] 0.6293572  
## [1] 0.251071  
## [1] 0.7596586  
## [1] 0.4509715  
## [1] 0.4194573  
## [1] 0.2410539  
## [1] 0.6456791  
## [1] 0.7355681  
## [1] 0.631905  
## [1] 0.69536  
## [1] 0.5778142  
## [1] 0.4760281  
## [1] 0.642023  
## [1] 0.36937  
## [1] 0.4357793  
## [1] 0.2766556  
## [1] 0.5132012  
## [1] 0.1636617

```
## [1] 0.7393992
## [1] 0.4958403
## [1] 0.172681
## [1] 0.6463179
## [1] 0.5903157
## [1] 0.393137
## [1] 0.7239418
## [1] 0.3621122
## [1] 0.6498011
## [1] 0.2339883
## [1] 0.5483706
## [1] 0.2081683
## [1] 0.5177668
## [1] 0.6192567
## [1] 0.609796
## [1] 0.2968183
## [1] 0.6362316
## [1] 0.4532429
## [1] 0.6682868
## [1] 0.4565895
```

```
#Visualizing data from LASSO and EN ####
```

```
#obtain in a data frame all error, betas names, number and lamda for the N models for each lasso and EN
```

```
All_info<-data.frame(Error=ListError, BetasNames=BetasFin, BetasNum=BNumFin, Lambda=LambdaFin)
```

```
All_infoEN<-data.frame(Error=ErrorsFinEN, BetasNames=BetasFinEN, BetasNum=BNumFinEN, Lambda=LambdaFinEN)
```

```
m<-m[-1,]
```

```
mEN<-mEN[-1,]
```

```
Final_LASSO<-m[order(-m$n),] #order highest frequencies above and filter with those that appear more th
```

```
Final_LASSO1<-filter(Final_LASSO,n>40) #threshold selected - 80%
```

```
Final_EN<-mEN[order(-mEN$n),]
```

```
Final_EN1<-filter(Final_EN,n>40)
```

```
Final_Plot_Names<-filter(Final_EN,n>40)
```

```
outputVenn2<-venn(list(EN= Final_EN$All, LASSO = Final_LASSO$All))
```

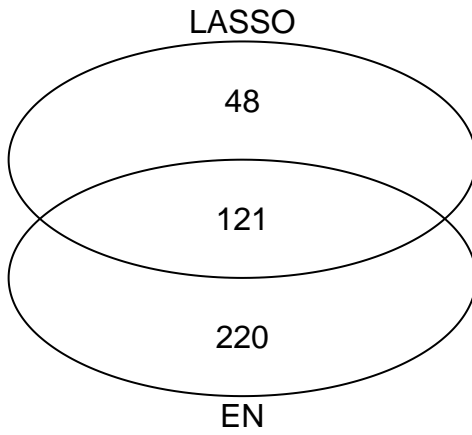

```
outputVenn<-venn(list(EN= Final_EN1$All, LASSO = Final_LASSO1$All))
```

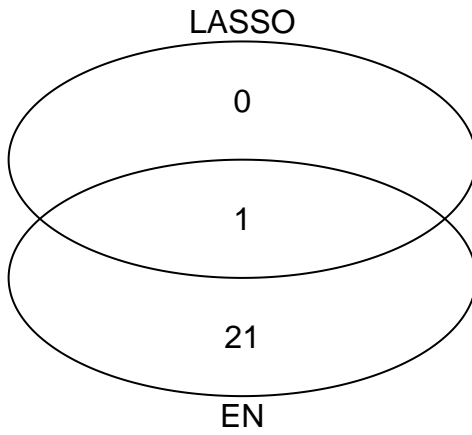

```
Freqs<-m[order(-m$n),]  
num<-length(Freqs$All)
```

```
Freqs$All <- factor(Freqs$All, levels = Freqs$All[order(-Freqs$n)]) #plot in a bar graph the frequencies  
ggplot(Freqs, aes(All, n))+geom_bar(stat="identity")+theme(axis.text.x = element_text(size=8, angle=90))
```



## EN features

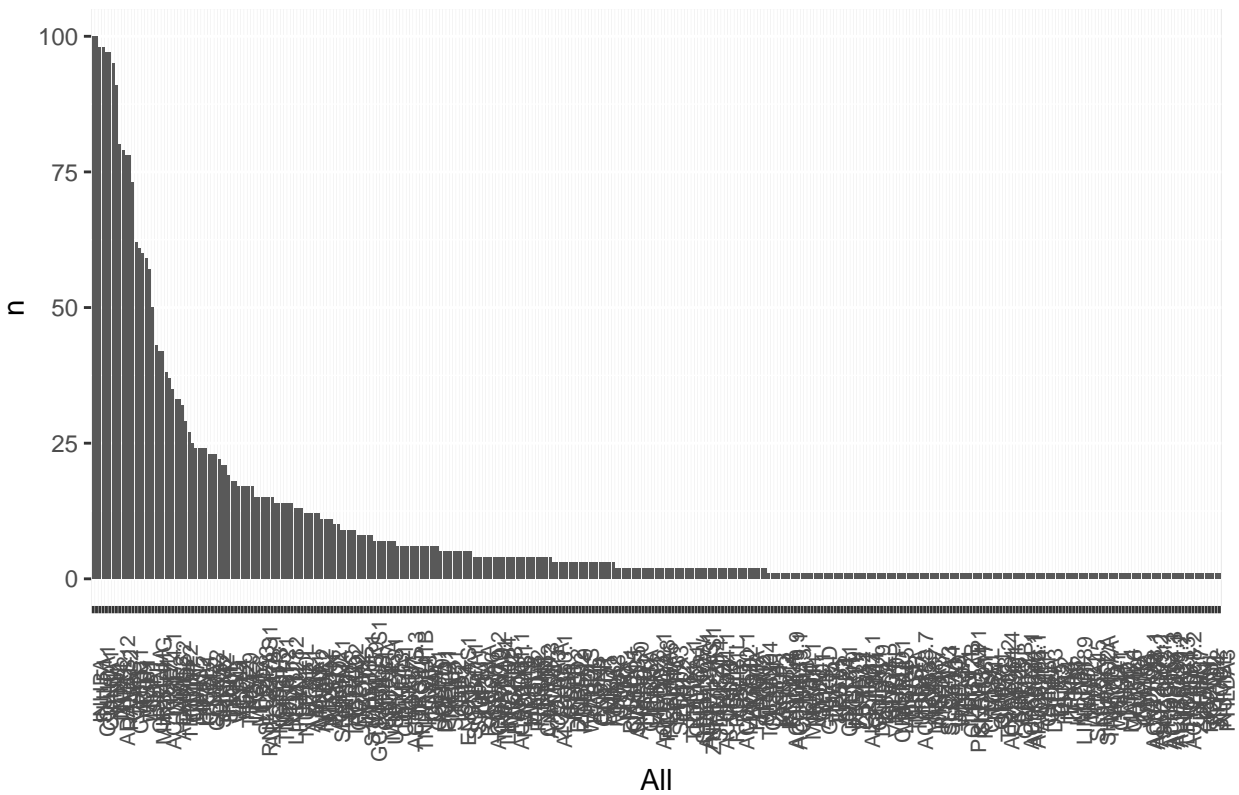

*#plot of how many times each feature appears. Most important will appear in all models = N.*

*#Boxplot with Betas and its coefficients*

```
Boxplot1<-BetasTodo[BetasTodo$Features %in% Final_EN1$All,] #see which features appear in the filtered .  
ggplot(Boxplot1,aes(Boxplot1$Features,Boxplot1$Coefficients))+geom_boxplot()+geom_jitter()
```

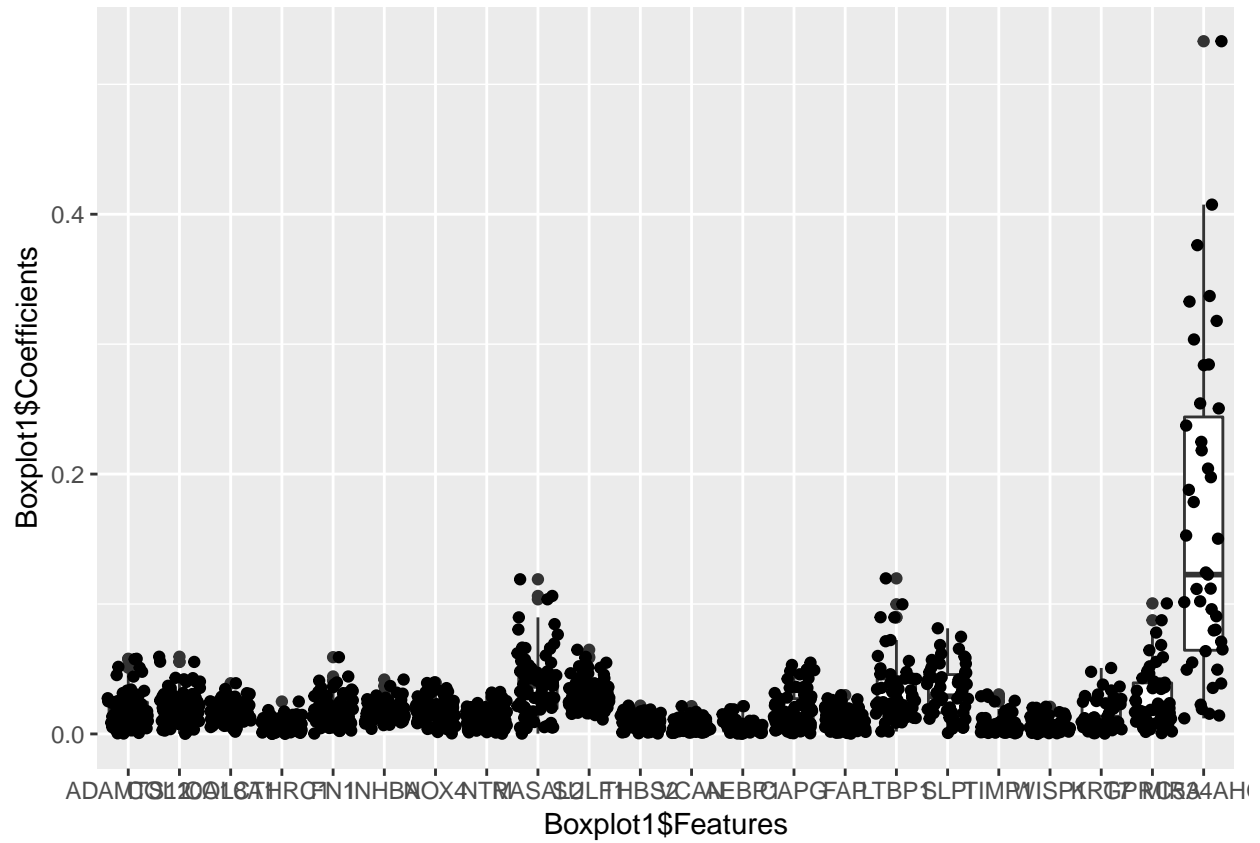

```
Boxplot1["Method"]<-as.factor("EN")

Boxplot2<-BetasTodoL[BetasTodoL$Features %in% Final_LASSO1$All,]
ggplot(Boxplot2,aes(Boxplot2$Features,Boxplot2$Coefficients))+geom_boxplot()+geom_jitter()
```



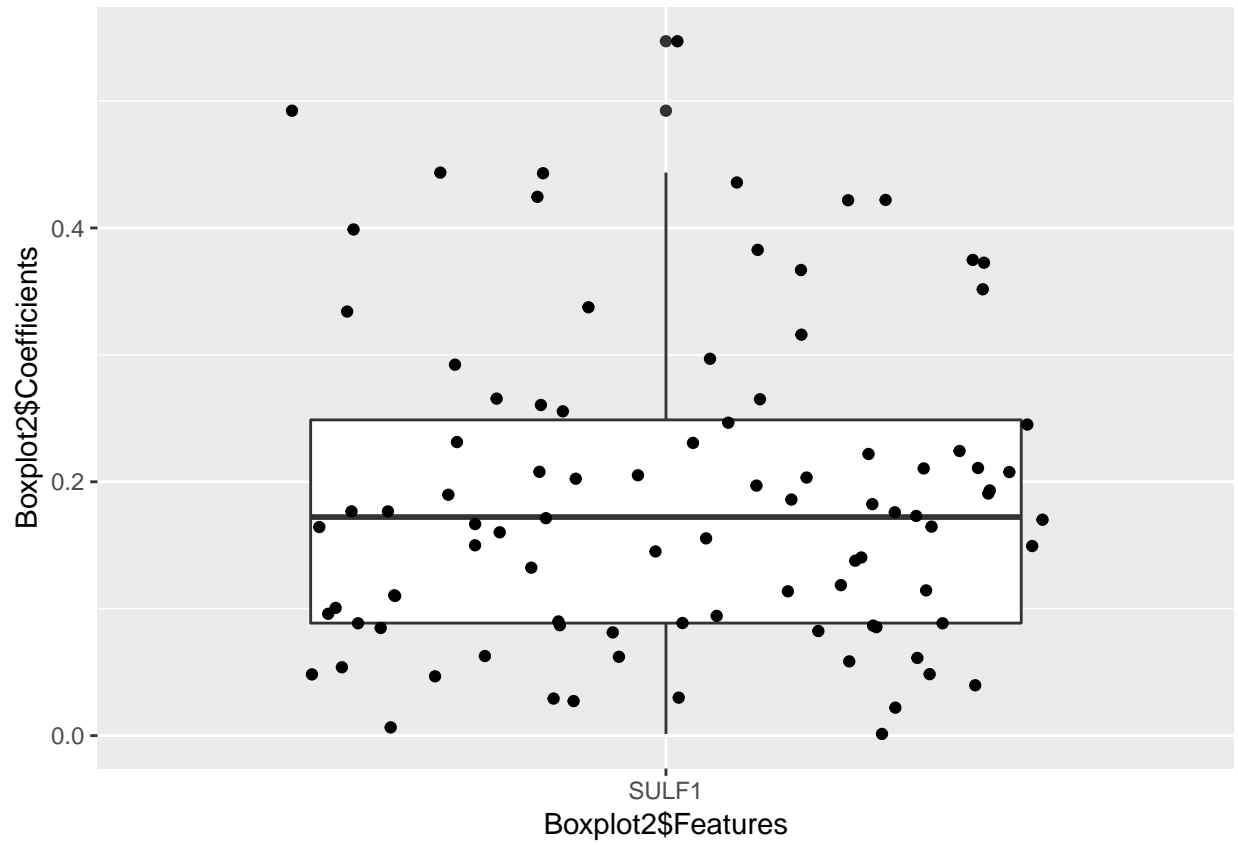

```
Boxplot2["Method"]<-as.factor("LASSO")
```

```
Fin_Boxplot<-rbind(Boxplot1,Boxplot2) #Unite both boxplots LASSO and EN
```

```
ggplot(Fin_Boxplot,aes(Fin_Boxplot$Features,Fin_Boxplot$Coefficients))+geom_boxplot(aes(color=Method))+
```

## Beta coefficients EN and LASSO

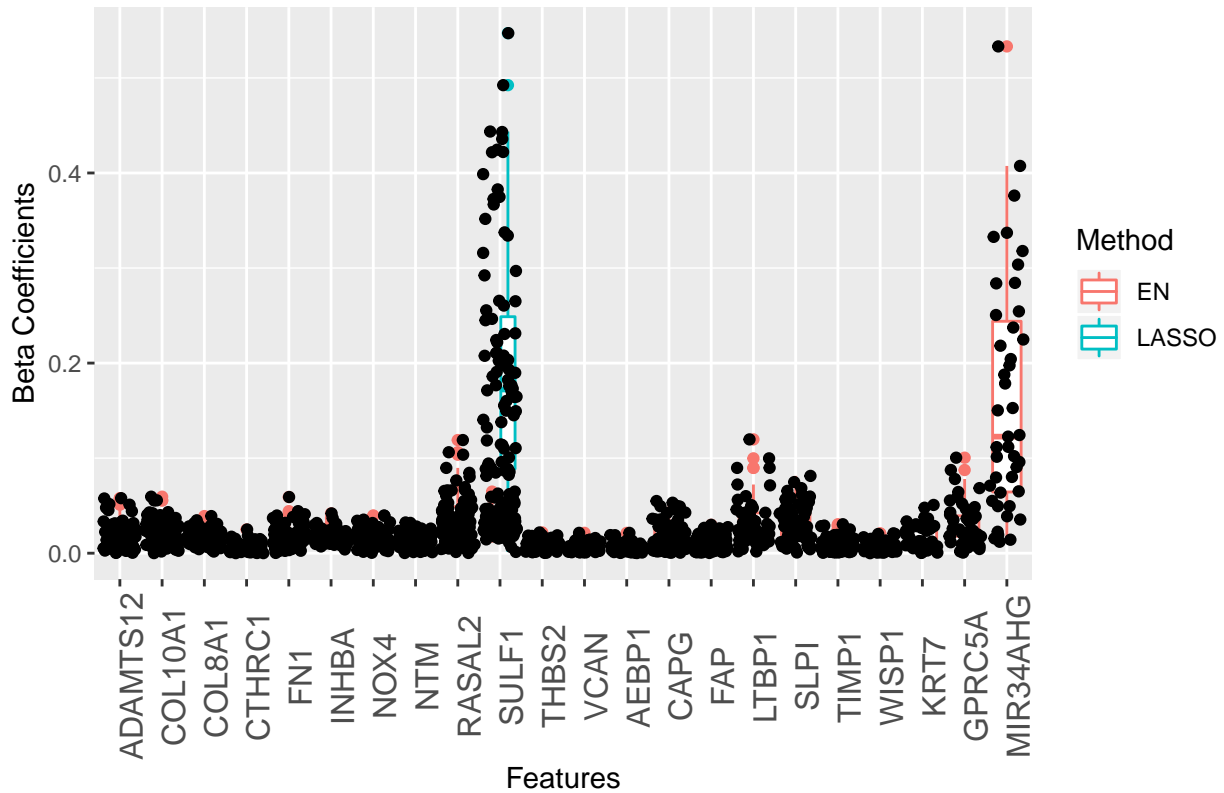

```
All_Feat<-rbind(Final_LASSO1,Final_EN1)
All_Feat2<-unique(All_Feat$All) #select the filtered betas in both.
#All_Feat2<-data.frame(All_Feat2)
Betas_select<-All12[,colnames(All12[,intersect(gsub("~", "", All_Feat2), colnames(All12))])]
Betas_select["Label"]<-All12$Label
Betas_select<-data.frame(Betas_select)

#Beta_select are the final features selected.

##### End Block 2

##### Begin Block 3

###Combinatorial analysis ###
NumVar<-length(Betas_select)
maxCombF<-data.frame(Name=toString("Trial"),AUC=0)
auc3max<-0
cont<-0
cont2<-0

for (p in 1:N){ #N different measurements of AUC values, mean done at the end.
  smp_size<-floor(0.65 * nrow(Betas_select))
  train_ind <- caret::createDataPartition(All12$Label, p = 0.65, list = FALSE, times = 1)

  # Training set
  train<-Betas_select[train_ind, ]
```

```

# Test set
test<-Betas_select[-train_ind, ]

xtrain <- train[ , !(names(train) %in% "Label")] %>% as.matrix()

xtest <- test[ , !(names(test) %in% "Label")] %>% as.matrix()

ytrain<-train$Label
ytest<-test$Label

xtest<-data.frame(xtest)
xtrain<-data.frame(xtrain)

y<-Betas_select[,NumVar]
X<-Betas_select[,1:(NumVar-1)]

levels(ytrain)[1]<-"0"
levels(ytrain)[2]<-"1"
levels(ytest)[1]<-"0"
levels(ytest)[2]<-"1"

for (k in 1:nn){
  columns<-c(1:dim(xtrain)[2])
  columns<-sample(columns)
  d<-xtrain[,columns]
  for (i in 1:dim(xtrain)[2]){
    for (j in 1:dim(xtrain)[2]){
      yy3<-data.frame(Outcome=ytrain,d[i:j])
      model3<-glm(Outcome~.,data=yy3, family=binomial(link='logit'))
      dd<-xtest[,columns]
      new3<-data.frame(dd[i:j])
      p3<-predict(model3,new3,type="response")
      new5<-data.frame(Outcome=ytest)
      pr3 <- prediction(p3, new5)
      prf3 <- performance(pr3, measure = "tpr", x.measure = "fpr")
      auc3 <- performance(pr3, measure = "auc")
      auc3 <- auc3@y.values[[1]]
      result2<-auc3
      if (auc3>auc3max){
        if (i>j){
          maxComb<-data.frame(Name=toString(names(d)[j:i]),AUC=auc3)
          auc3max<-auc3
          cont<-cont+1
        }
      }
      else{
        maxComb<-data.frame(Name=toString(names(d)[i:j]),AUC=auc3)
        auc3max<-auc3
        cont<-cont+1
      }
    }
  }
}

```

```

    else{
      cont2<-cont2+1
    }
  }
}
}
}
maxCombF<-rbind(maxCombF,maxComb)
auc3max<-0
}

maxCombF2<-maxCombF[order(maxCombF$AUC),]
names<-maxCombF2$Name[dim(maxCombF2)[1]]
names1<-as.character(names)
names1<-strsplit(names1," ")
names<-as.data.frame(names1)

Betas_select2<-A112[,colnames(A112[,intersect(gsub("`", "", names[,1]), colnames(A112))])]
Betas_select2["Label"]<-savee
Betas_select2<-as.data.frame(Betas_select2)

#### End Block 3

#### Begin Block 4

#Random mix between variables and AUC value obtained through GLM model, rough approximation of future p
#Betas_select2, final features selected.

NumVar<-length(Betas_select2)

N<-1000 #number of models produced (both permuted (random) and real) - for all univariate (Each featur
#Real program runs with 1000 - Takes 12 hours.

multipleAUC<-matrix(rnorm(2),1,N)
multipleAUCR<-matrix(rnorm(2),1,N)
multipleAUCNB<-matrix(rnorm(2),1,N)
multipleAUCNBR<-matrix(rnorm(2),1,N)

multipleROC<-matrix(as.list(rnorm(2)),1,N)
multipleROCR<-matrix(as.list(rnorm(2)),1,N)
multipleNBROC<-matrix(as.list(rnorm(2)),1,N)
multipleNBROCR<-matrix(as.list(rnorm(2)),1,N)

singleROC<-list()
doubleROC<-list()
singleROCR<-list()
doubleROCR<-list()

doublePlus<-list()
singlePlus<-list()

```

```

singleAUC<-matrix(rnorm(2), NumVar-1, N)
doubleAUC<-matrix(rnorm(2), (NumVar-1), N)
singleAUCR<-matrix(rnorm(2), NumVar-1, N)
doubleAUCR<-matrix(rnorm(2), (NumVar-1), N)

doubleAUCSVMR<-matrix(rnorm(2), (NumVar-1), N)
doubleAUCSVM<-matrix(rnorm(2), (NumVar-1), N)
doubleAUCSVMCrossR<-matrix(rnorm(2), (NumVar-1), N)
doubleAUCSVMCross<-matrix(rnorm(2), (NumVar-1), N)
doubleAUCRFCross<-matrix(rnorm(2), (NumVar-1), N)
doubleAUCRFCrossR<-matrix(rnorm(2), (NumVar-1), N)
doubleAUCNBR<-matrix(rnorm(2), (NumVar-1), N)
doubleAUCNB<-matrix(rnorm(2), (NumVar-1), N)

MatsingleROC<-matrix(as.list(rnorm(2)), NumVar-1, N)
MatsingleROCR<-matrix(as.list(rnorm(2)), NumVar-1, N)
MatdoubleROC<-matrix(as.list(rnorm(2)), (NumVar-1), N)
MatdoubleROCR<-matrix(as.list(rnorm(2)), (NumVar-1), N)

MatsinglePlus<-matrix(as.list(rnorm(2)), NumVar-1, N)
MatdoublePlus<-matrix(as.list(rnorm(2)), (NumVar-1), N)
MatsinglePlusR<-matrix(as.list(rnorm(2)), NumVar-1, N)
MatdoublePlusR<-matrix(as.list(rnorm(2)), (NumVar-1), N)
##### End Block 4

##### Begin Block 5

for (j in 1:N){ #N different measurements of AUC values, mean done at the end.
  smp_size<-floor(0.65 * nrow(Betas_select2))
  train_ind <- caret::createDataPartition(All12$Label, p = 0.65, list = FALSE, times = 1)

  # Training set
  train<-Betas_select2[train_ind, ]

  # Test set
  test<-Betas_select2[-train_ind, ]

  xtrain <- train[ , !(names(train) %in% "Label")] %>% as.matrix()

  xtest <- test[ , !(names(test) %in% "Label")] %>% as.matrix()

  ytrain<-train$Label
  ytest<-test$Label

  xtest<-data.frame(xtest)
  xtrain<-data.frame(xtrain)

  y<-Betas_select2[, NumVar]
  X<-Betas_select2[, 1:(NumVar-1)]

  levels(ytrain)[1]<- "0"

```

```

levels(ytrain)[2]<-"1"
levels(ytest)[1]<-"0"
levels(ytest)[2]<-"1"

# source('AUCFun29-3.R')

## multiple, good
multipleAUCNB[1,j]<-multipleAUCfunNB(xtrain, ytrain,xtest,ytest)
multipleAUC[1,j]<-multipleAUCfun(xtrain, ytrain,xtest,ytest)

multipleNBROC[[j]]<-multipleROCfunNB(xtrain, ytrain,xtest,ytest)
multipleROC[[j]]<-multipleROCfun(xtrain, ytrain,xtest,ytest)

#separate

## single, should be good
for (s in (1:(NumVar-1))){
  s<-as.numeric(s)
  singleAUC[s,j]<-singleAUCfun(xtrain, ytrain,xtest,ytest,s)
  singleROC[[s]]<-singleROCfun(xtrain, ytrain,xtest,ytest,s)
  MatsinglePlus[s,j]<-singlePlusfun(xtrain, ytrain,xtest,ytest,s)
}
MatsingleROC[,j]<-matrix(singleROC)

# Training set

train$Label<-sample(train$Label)
test$Label<-sample(test$Label)
#Permuted data, will make sure that are models are really valid as randomizing the label should yield

# Test set

xtrain <- train[ , !(names(train) %in% "Label")] %>% as.matrix()

xtest <- test[ , !(names(test) %in% "Label")] %>% as.matrix()

ytrain<-train$Label
ytest<-test$Label

xtest<-data.frame(xtest)
xtrain<-data.frame(xtrain)

y<-Betas_select2[,NumVar]
X<-Betas_select2[,1:(NumVar-1)]

```

```

levels(ytrain)[1]<-"0"
levels(ytrain)[2]<-"1"
levels(ytest)[1]<-"0"
levels(ytest)[2]<-"1"

multipleAUCNBR[1,j]<-multipleAUCfunNB(xtrain, ytrain,xtest,ytest)
multipleAUCR[1,j]<-multipleAUCfun(xtrain, ytrain,xtest,ytest)

multipleNBROCR[[j]]<-multipleROCfunNB(xtrain, ytrain,xtest,ytest)
multipleROCR[[j]]<-multipleROCfun(xtrain, ytrain,xtest,ytest)

for (s in (1:(NumVar-1))){
  s<-as.numeric(s)
  singleAUCR[s,j]<-singleAUCfun(xtrain, ytrain,xtest,ytest,s)
  singleROCR[[s]]<-singleROCfun(xtrain, ytrain,xtest,ytest,s)
  MatsinglePlusR[s,j]<-singlePlusfun(xtrain, ytrain,xtest,ytest,s)
}
MatsingleROCR[,j]<-matrix(singleROCR)

#
}

##### End Block 5

##### Begin Block 6

names2<-sapply(1:(NumVar-1), function(i){paste0("NISS/",names(xtrain)[i])})

trial<-NULL

h=1
for (b in (2:NumVar-1)) {
  print(b)
  trial[b]<-names2[h]
  h=h+1
}

## [1] 1
## [1] 2
## [1] 3
## [1] 4
## [1] 5
## [1] 6
## [1] 7
## [1] 8
## [1] 9

```

```
## [1] 10
## [1] 11
## [1] 12
## [1] 13
## [1] 14
```

```
singleAUC<-as.data.frame(singleAUC)
singleAUC<-mutate(singleAUC, Means=rowMeans(singleAUC))
row.names(singleAUC)<-names(xtrain)

singleAUCR<-as.data.frame(singleAUCR)
singleAUCR<-mutate(singleAUCR, Means=rowMeans(singleAUCR))
row.names(singleAUCR)<-names(xtrain)

multipleAUCNBR<-as.data.frame(multipleAUCNBR)
multipleAUCNBR["Means"]<-rowMeans(multipleAUCNBR)
multipleAUCR<-as.data.frame(multipleAUCR)
multipleAUCR["Means"]<-rowMeans(as.data.frame(multipleAUCR))

multipleAUCNB<-as.data.frame(multipleAUCNB)
multipleAUCNB["Means"]<-rowMeans(as.data.frame(multipleAUCNB))
multipleAUC<-as.data.frame(multipleAUC)
multipleAUC["Means"]<-rowMeans(as.data.frame(multipleAUC))

Final<-data.frame(MultiNB=t(multipleAUCNB),MultiNBRand=t(multipleAUCNBR),Multi=t(multipleAUC),MultiRand=
FinalMeans<-data.frame(MultiNB=multipleAUCNB$Means,MultiNBRand=multipleAUCNBR$Means,Multi=multipleAUC$M

#sacar ROC CURVES #####

print("here")

## [1] "here"

for (g in 1:(NumVar-1)){

  plot(MatsingleROC[[g,1]],lwd=3,main=paste("ROC curve of", names(xtrain)[g]))
  for (b in 1:N){

    plot(MatsingleROCR[[g,b]],col=b,lty=3,add=TRUE)
  }
}
```



ROC curve of GPRC5A

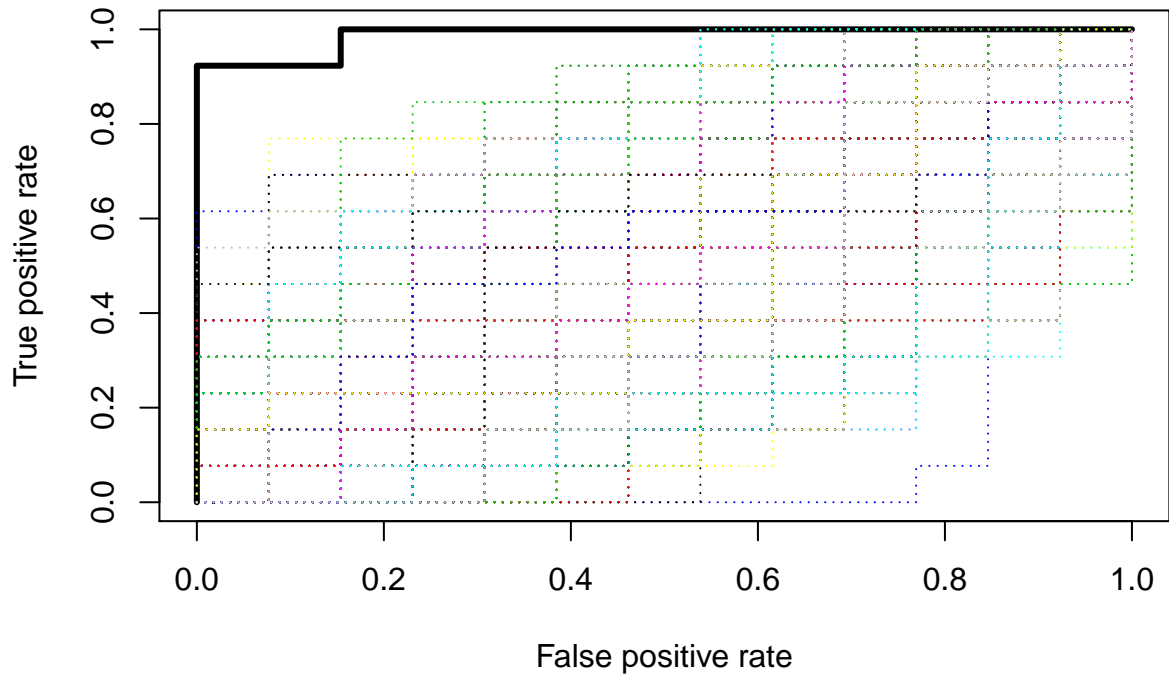

### ROC curve of CAPG

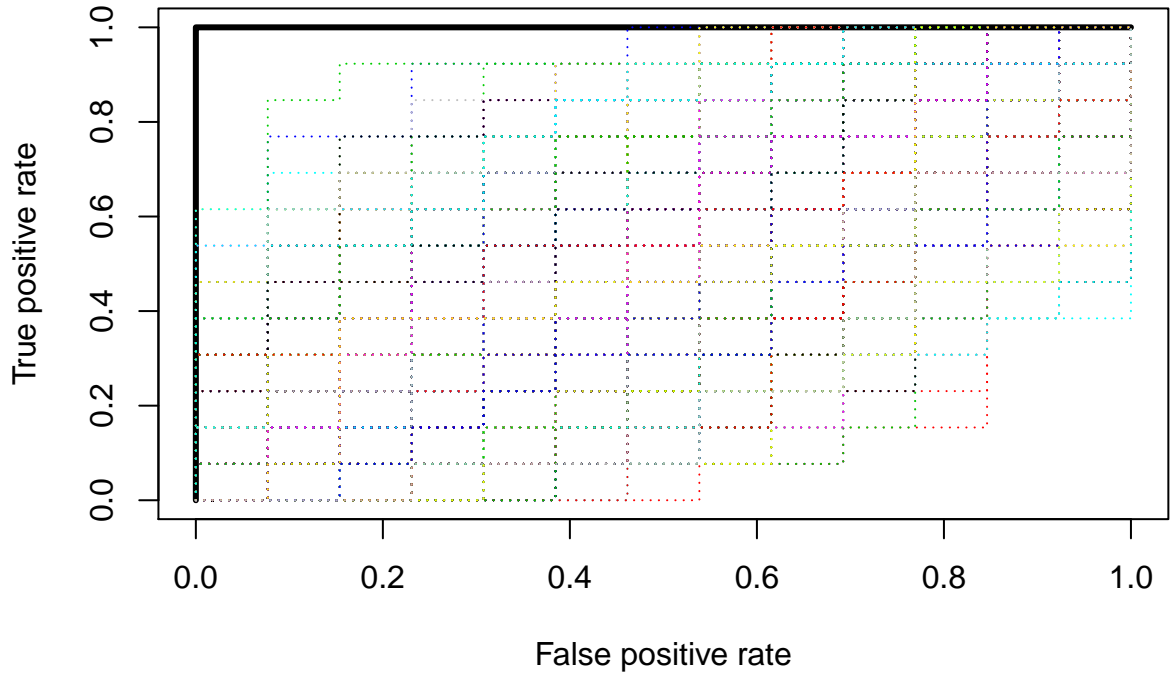

### ROC curve of INHBA

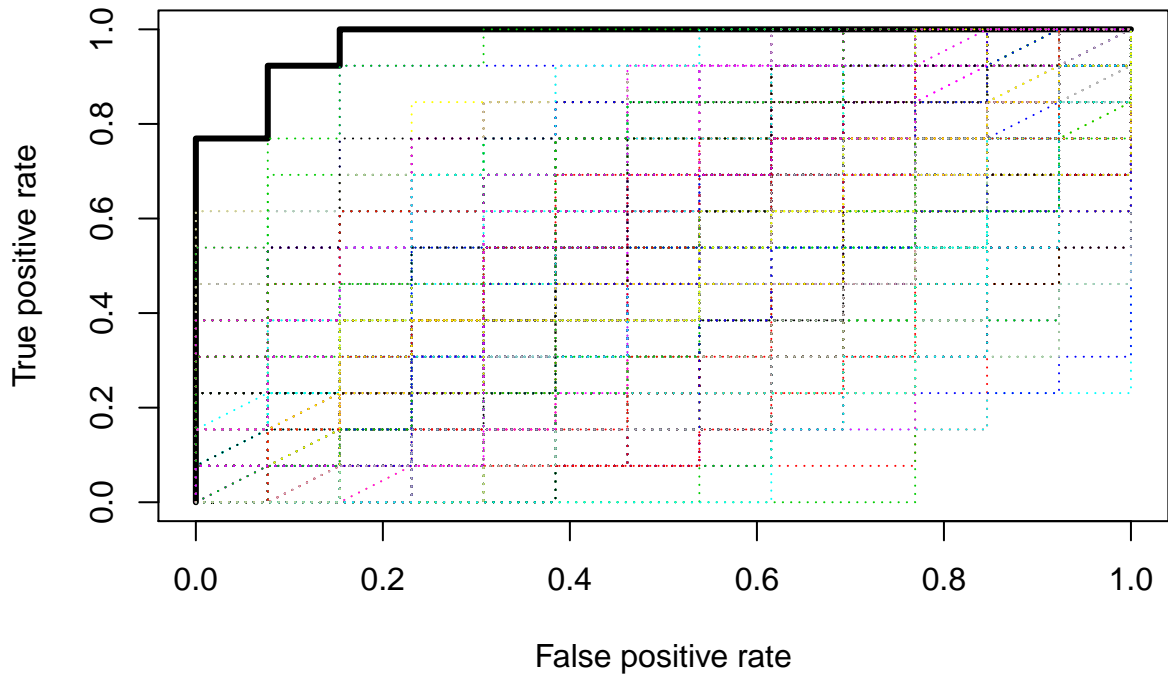

ROC curve of COL8A1

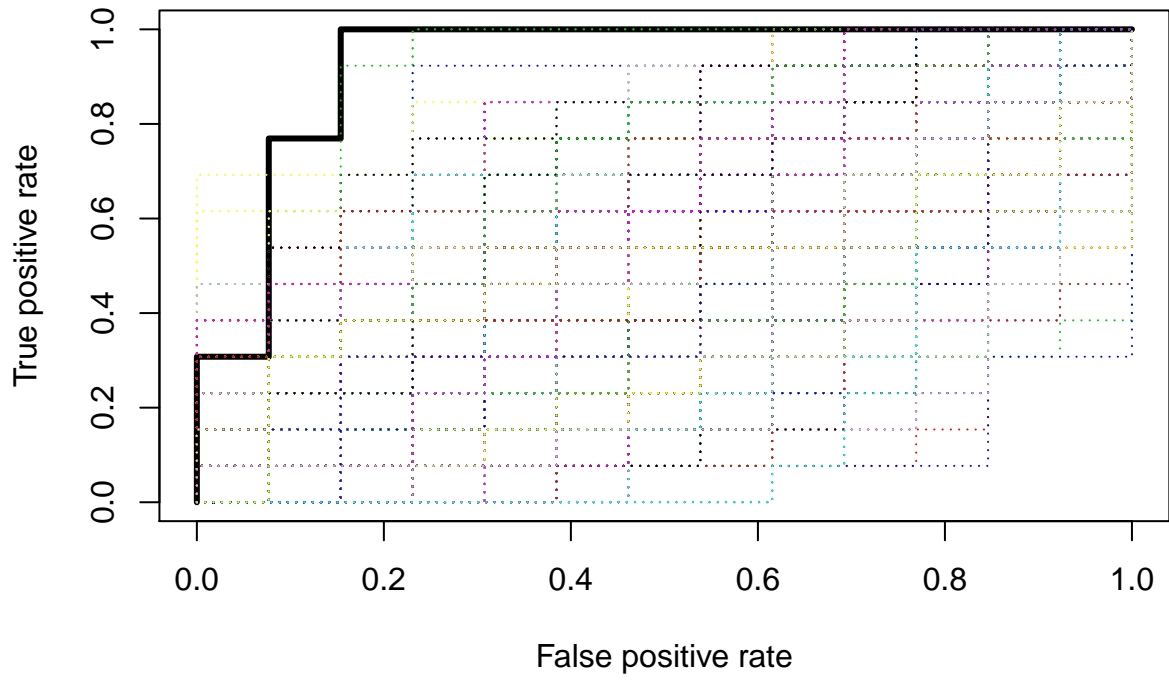

### ROC curve of SULF1

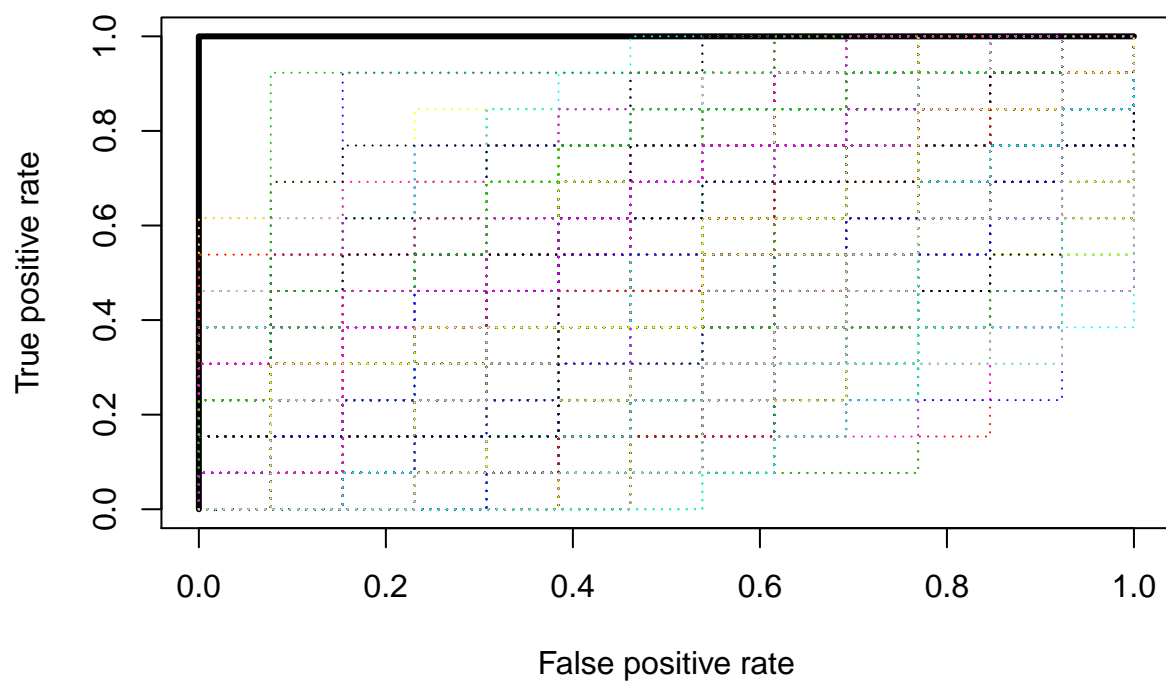

### ROC curve of RASAL2

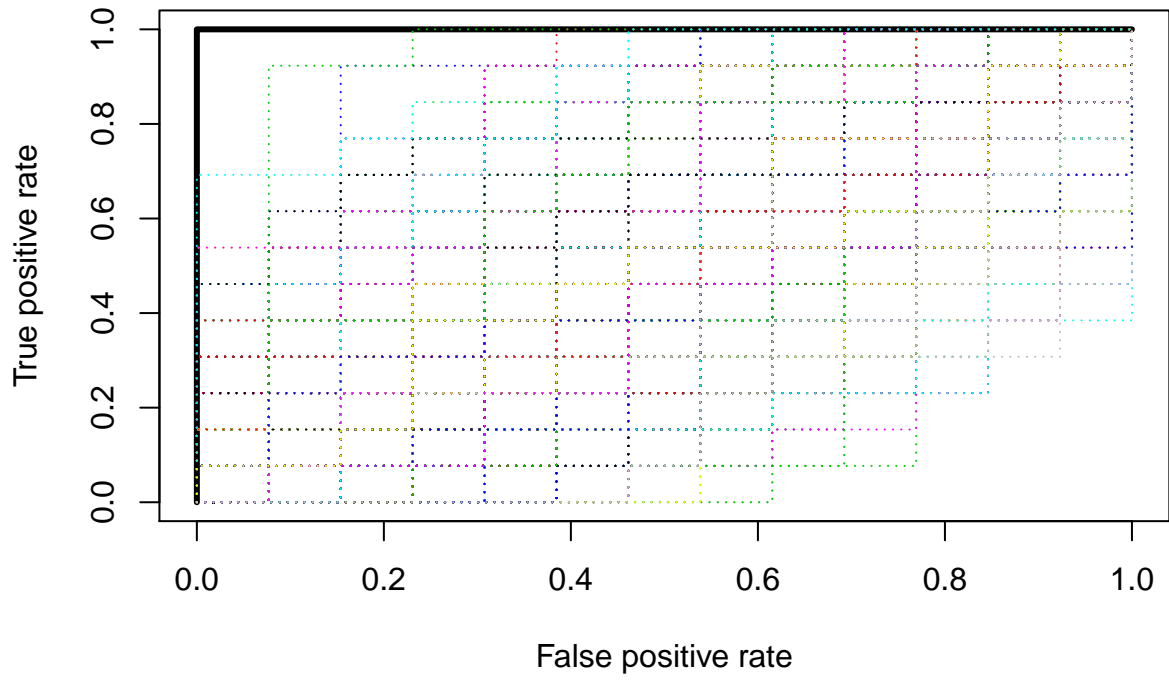

ROC curve of SLPI

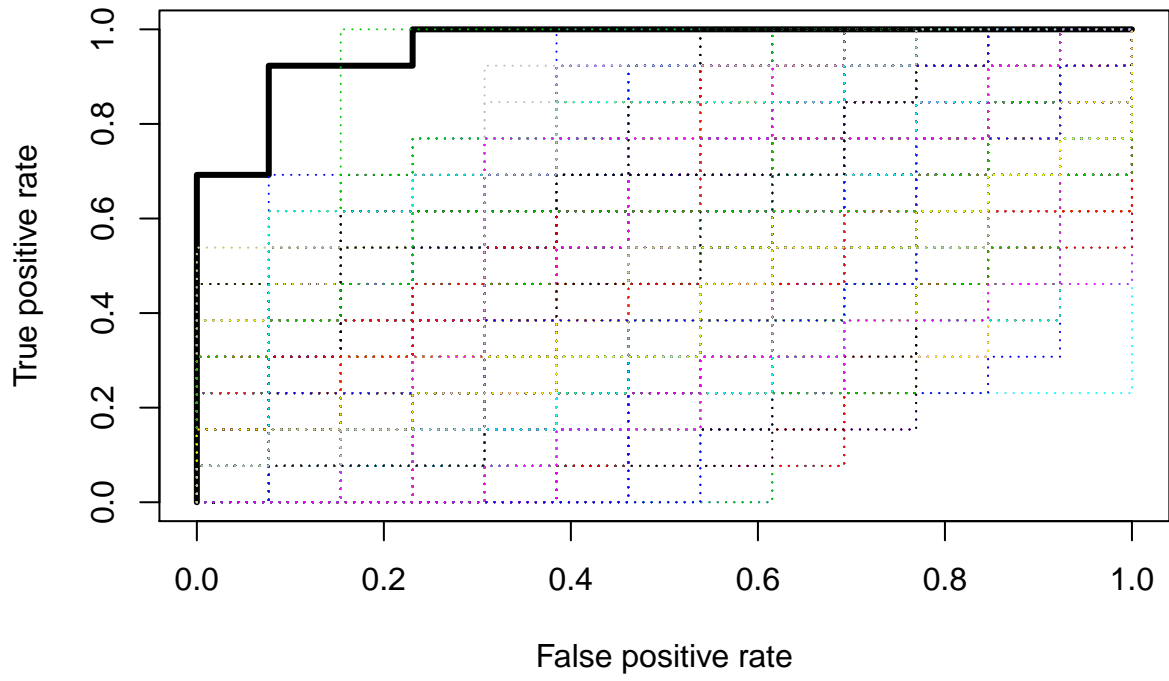

ROC curve of ADAMTS12

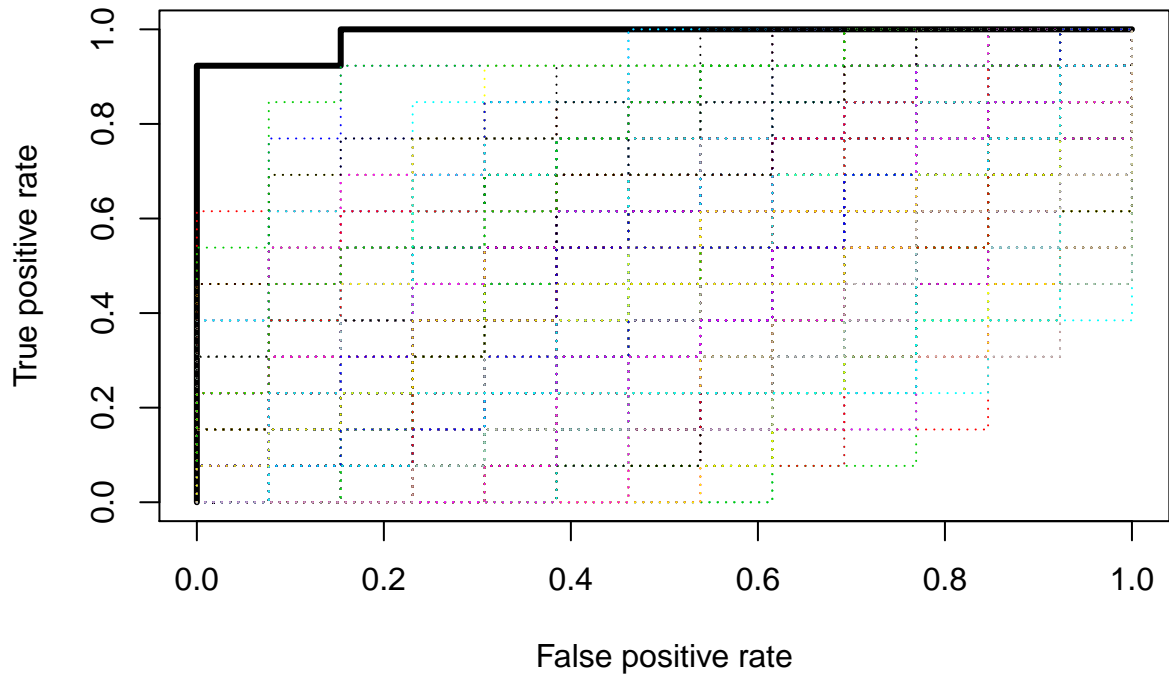



ROC curve of THBS2

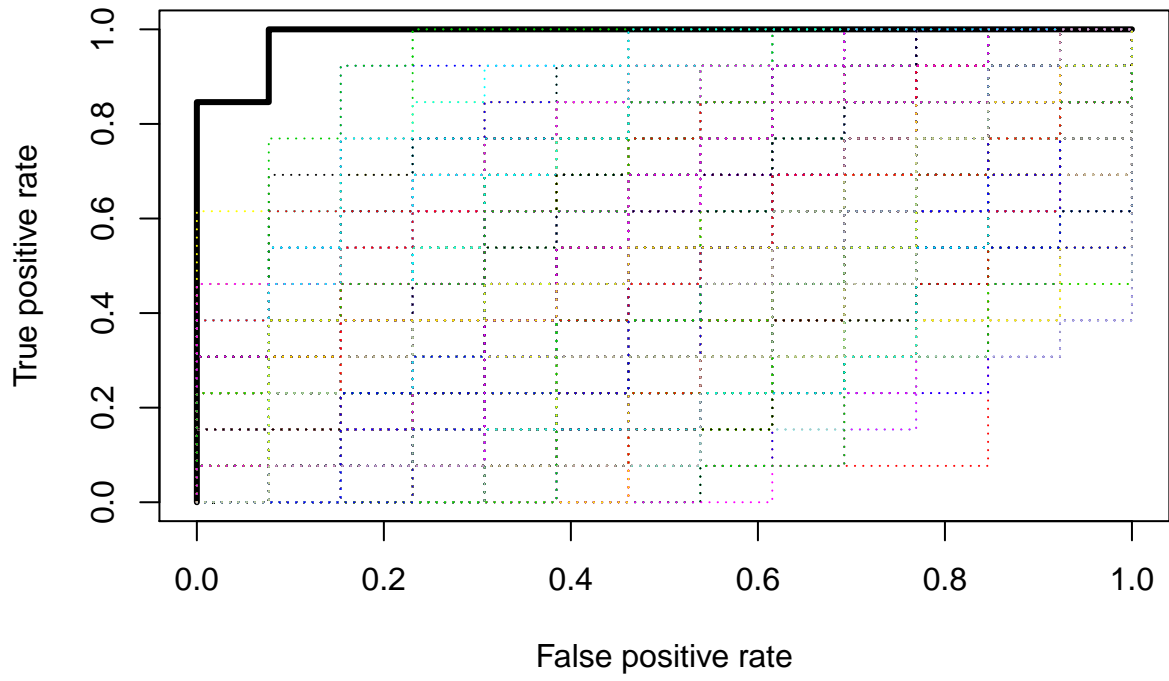

ROC curve of VCAN

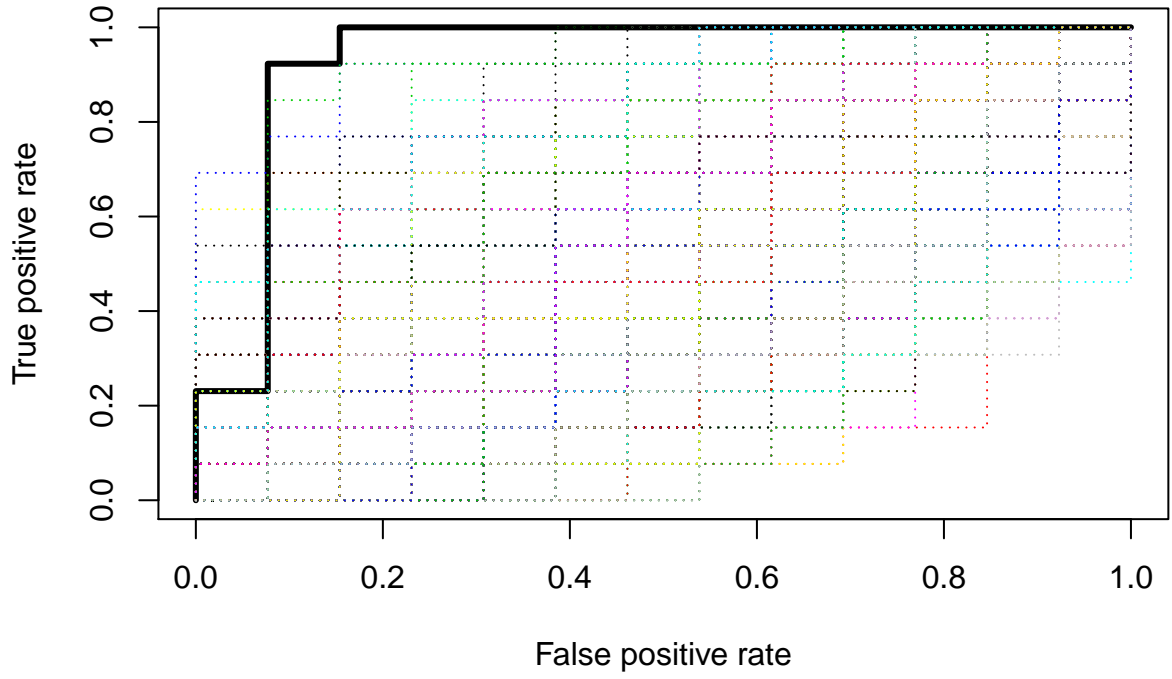

### ROC curve of LTBP1

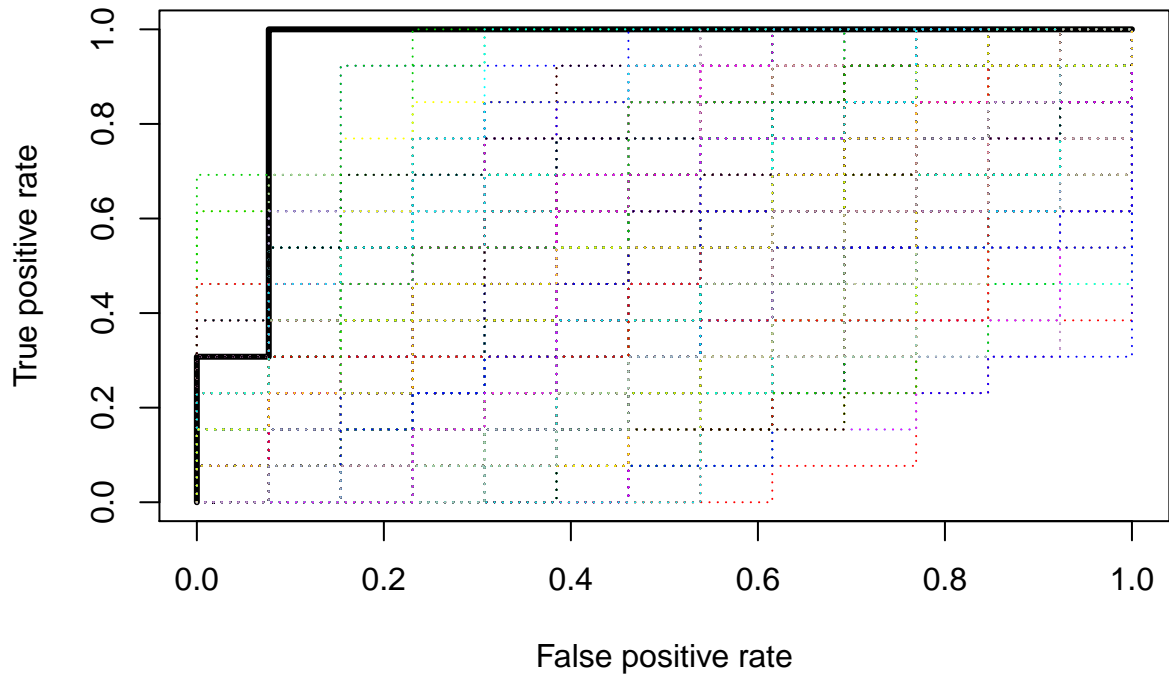

ROC curve of AEBP1

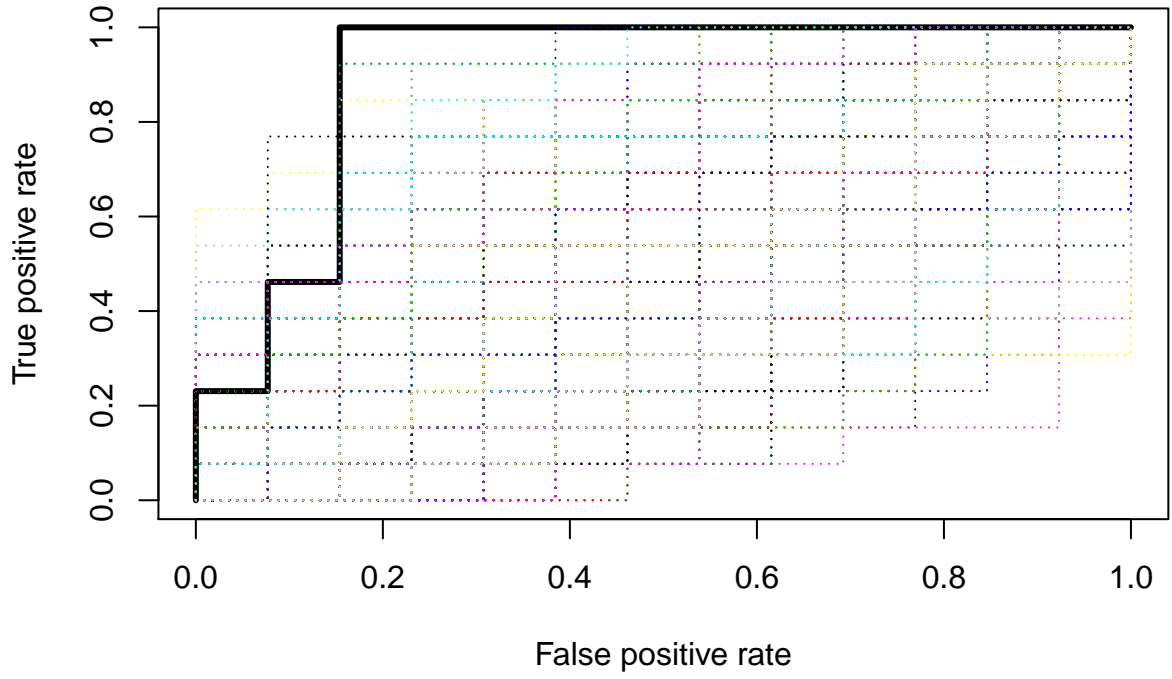

ROC curve of MIR34AHG

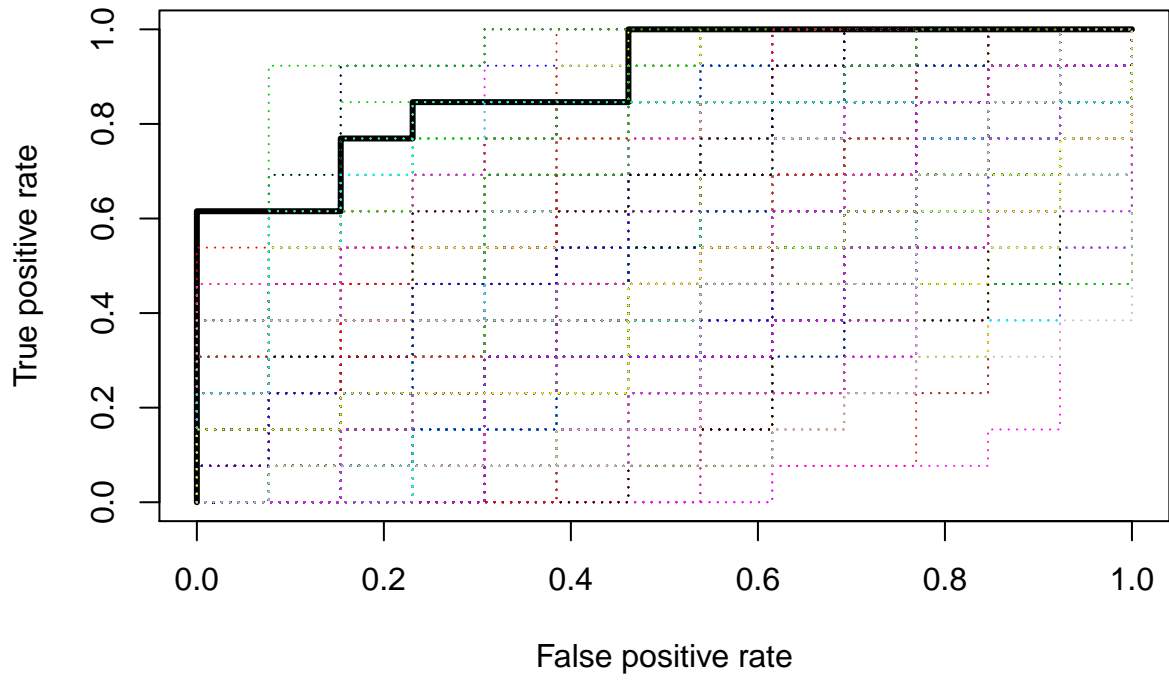

## ROC curve of KRT7

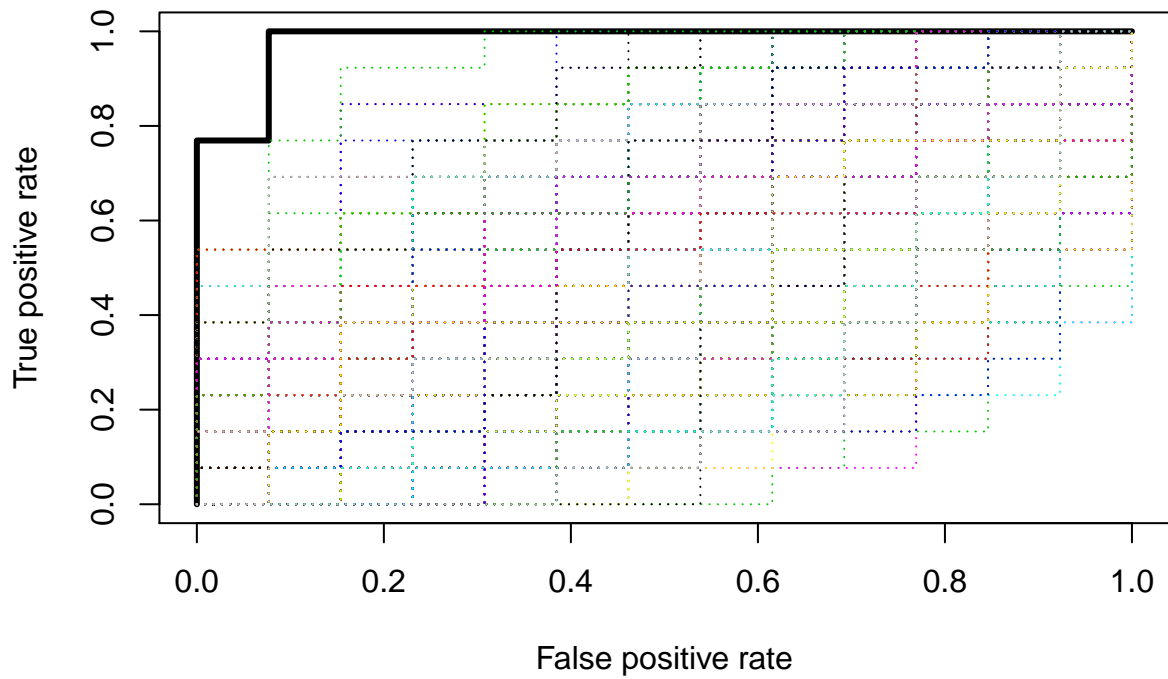

```
plot(multipleROC[[1]],lwd=3,main=paste("ROC curve of", trial[1]))
for (b in 1:N){
  plot(multipleNBROCR[[b]],col=b,lty=3,add=TRUE)
}
```

## ROC curve of NISS/GPRC5A

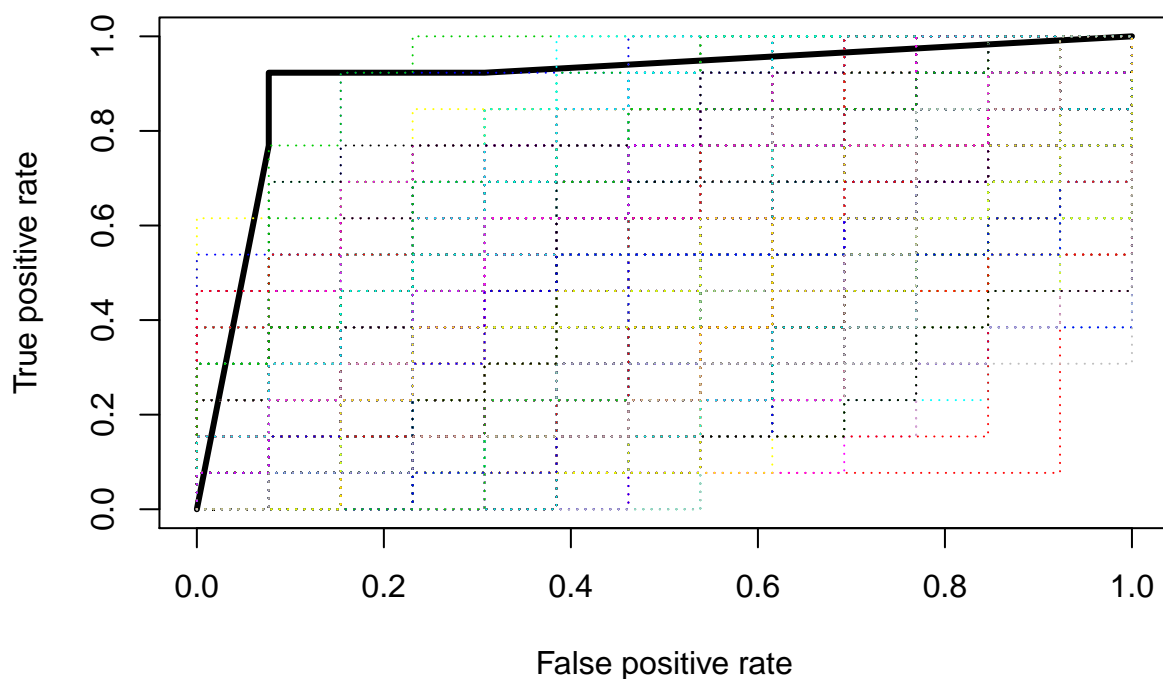

```

AUCT<-as.data.frame(t(singleAUC[1:dim(singleAUC)[2]-1]))
AUC2T<-as.data.frame(t(singleAUCR[1:dim(singleAUCR)[2]-1]))
one<-as.data.frame(singleAUC$Means)
two<-as.data.frame(singleAUCR$Means)
Mean<-data.frame(one,two)
Mean<-as.matrix(Mean)
#
nm<-names(AUCT)
for (j in 1:(NumVar-1)){

  Mono<-data.frame(Mono=AUCT[,j],Label=as.factor(c(rep("model",dim(AUCT)[1]))))
  Mono1<-data.frame(Mono=AUC2T[,j],Label=as.factor(c(rep("permuted data",dim(AUC2T)[1]))))
  Mono<-rbind(Mono,Mono1)
  print(ggdensity(Mono, x = "Mono", fill = "Label", palette = "jco")+geom_vline(xintercept =Mean[j,],li
}

```

Permuted versus real model, density plot of AUC curve of GPRC5A

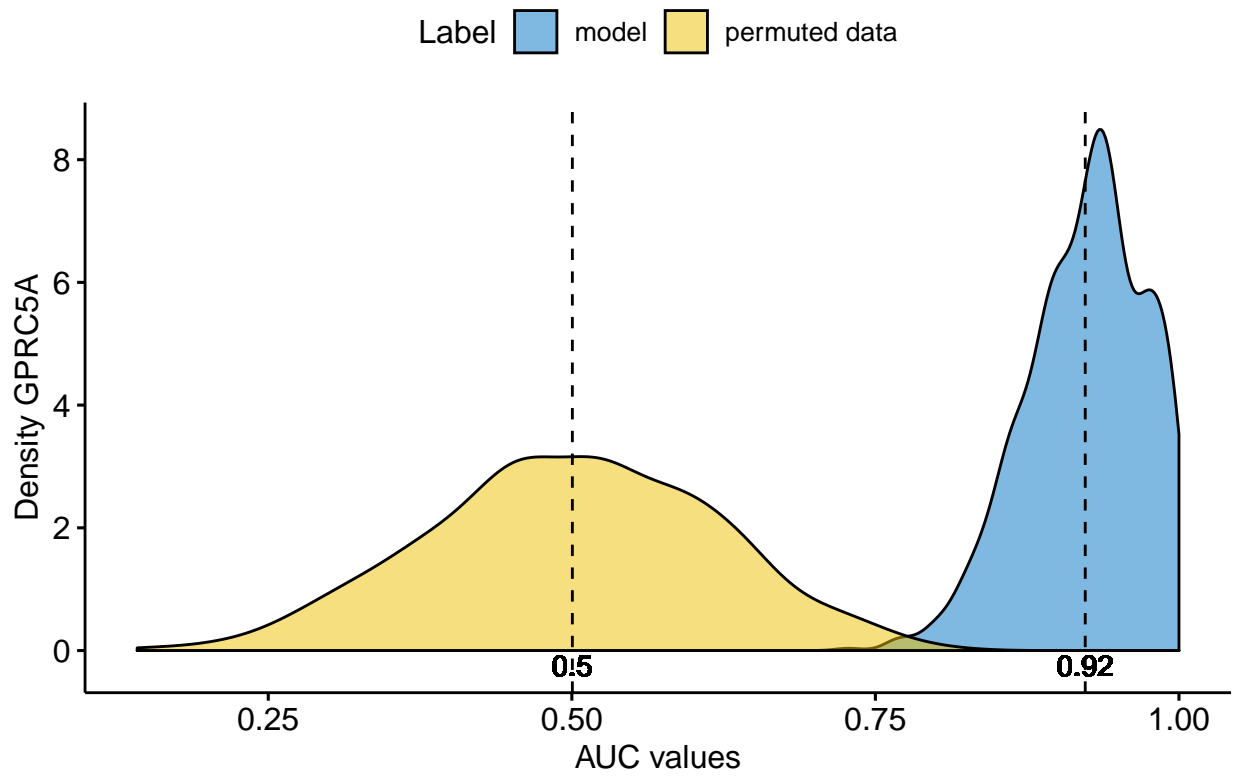



# Permuted versus real model, density plot of AUC curve of CAPG

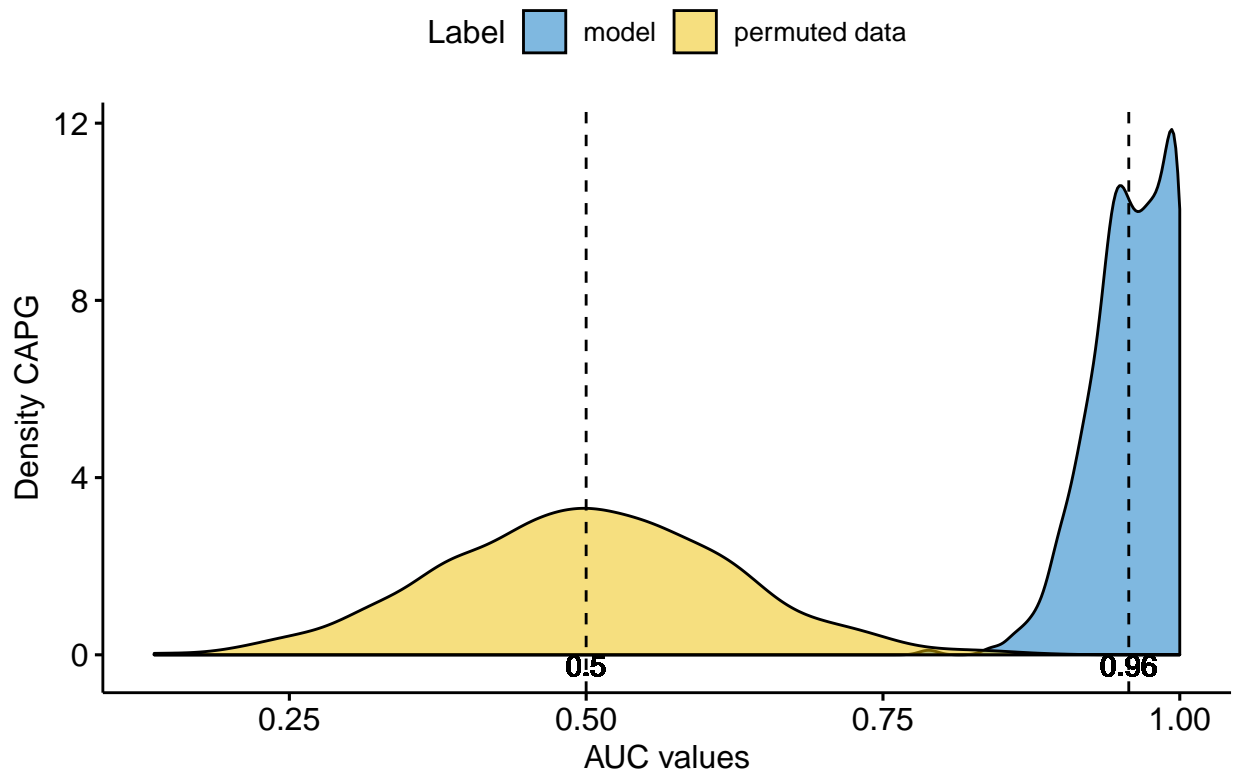

# Permuted versus real model, density plot of AUC curve of INHBA

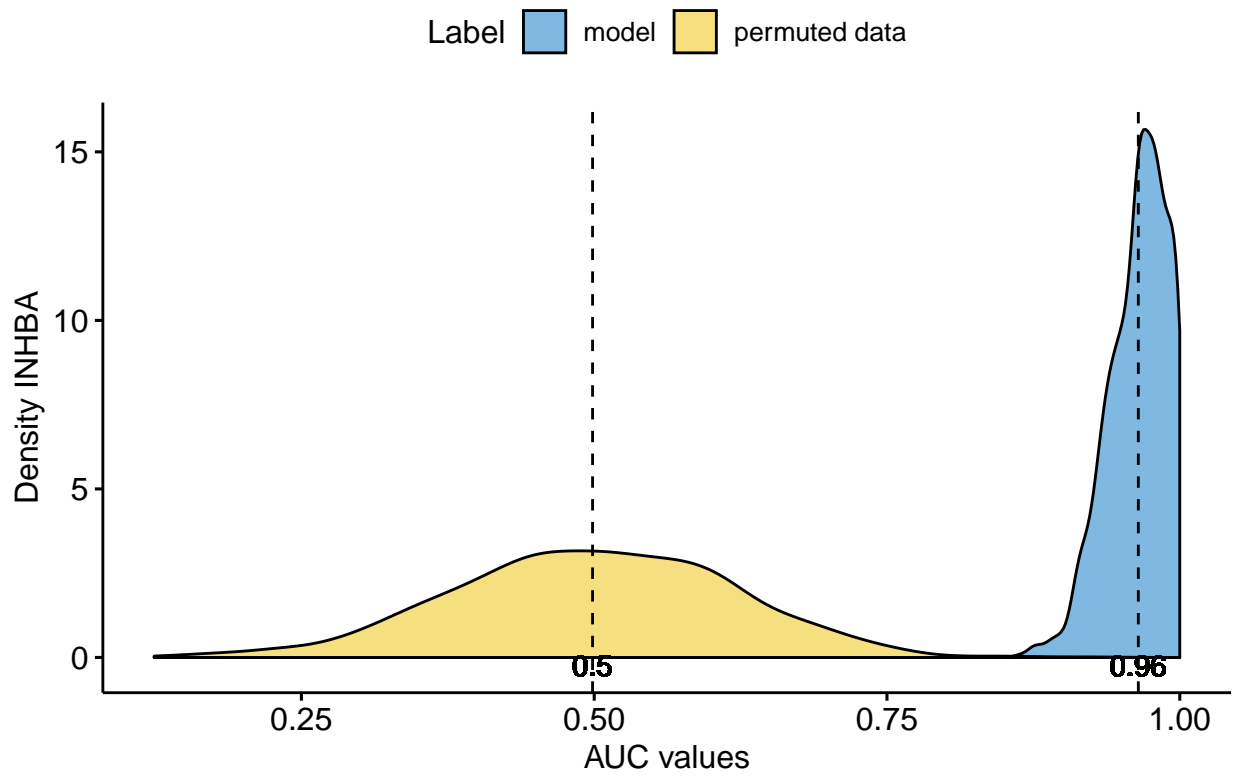

Permuted versus real model, density plot of AUC curve of COL8A1

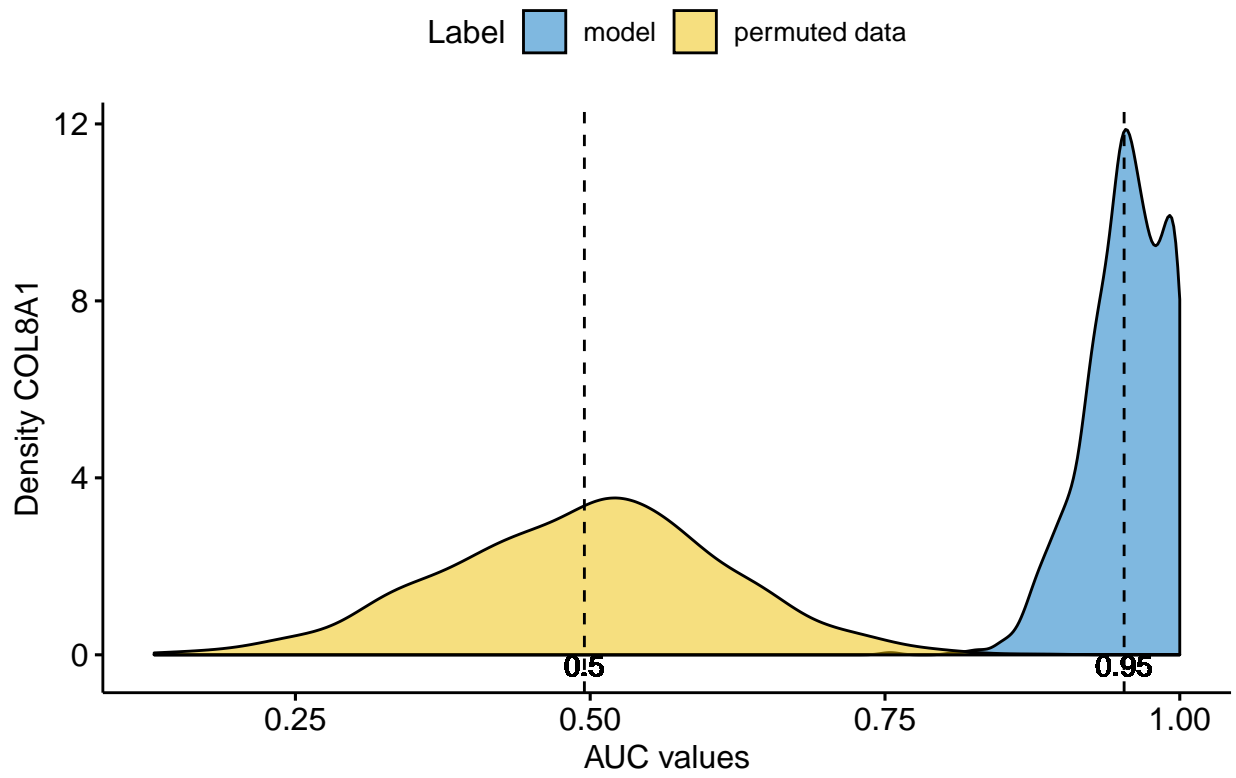

# Permuted versus real model, density plot of AUC curve of SULF1

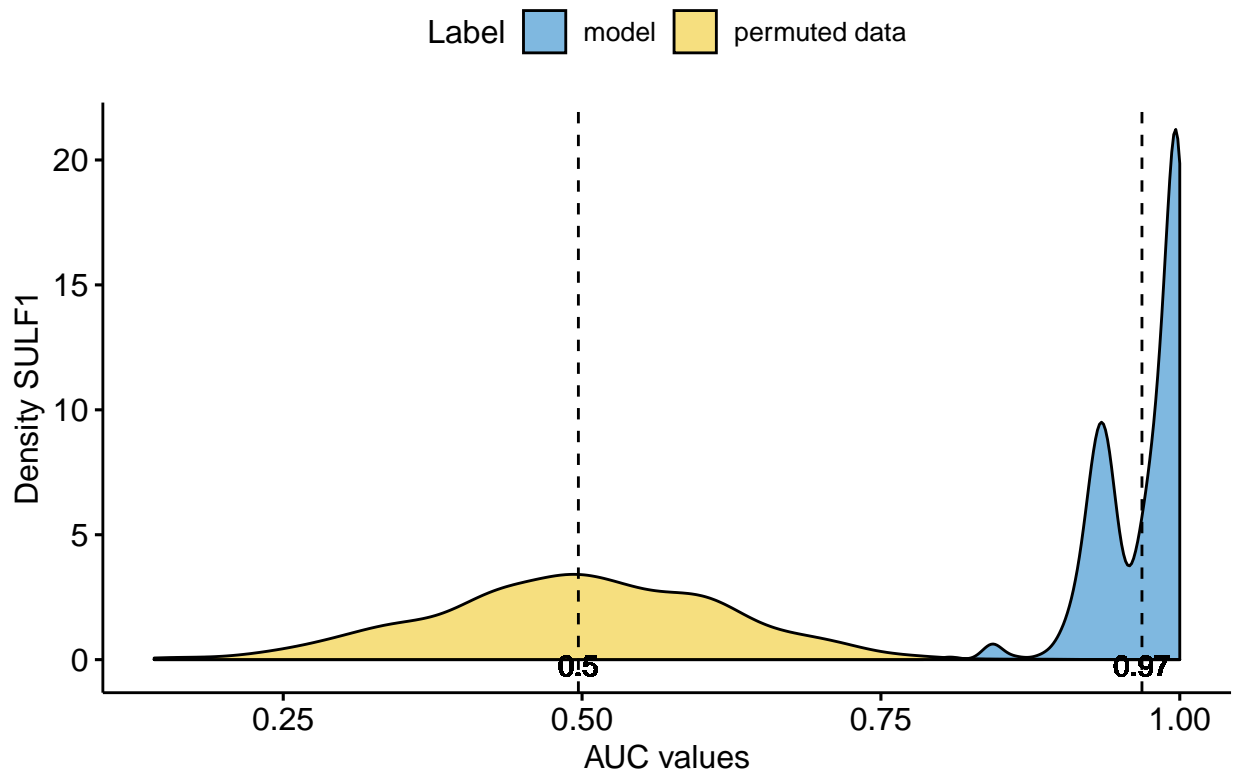

# Permuted versus real model, density plot of AUC curve of RASAL2

Label ■ model ■ permuted data

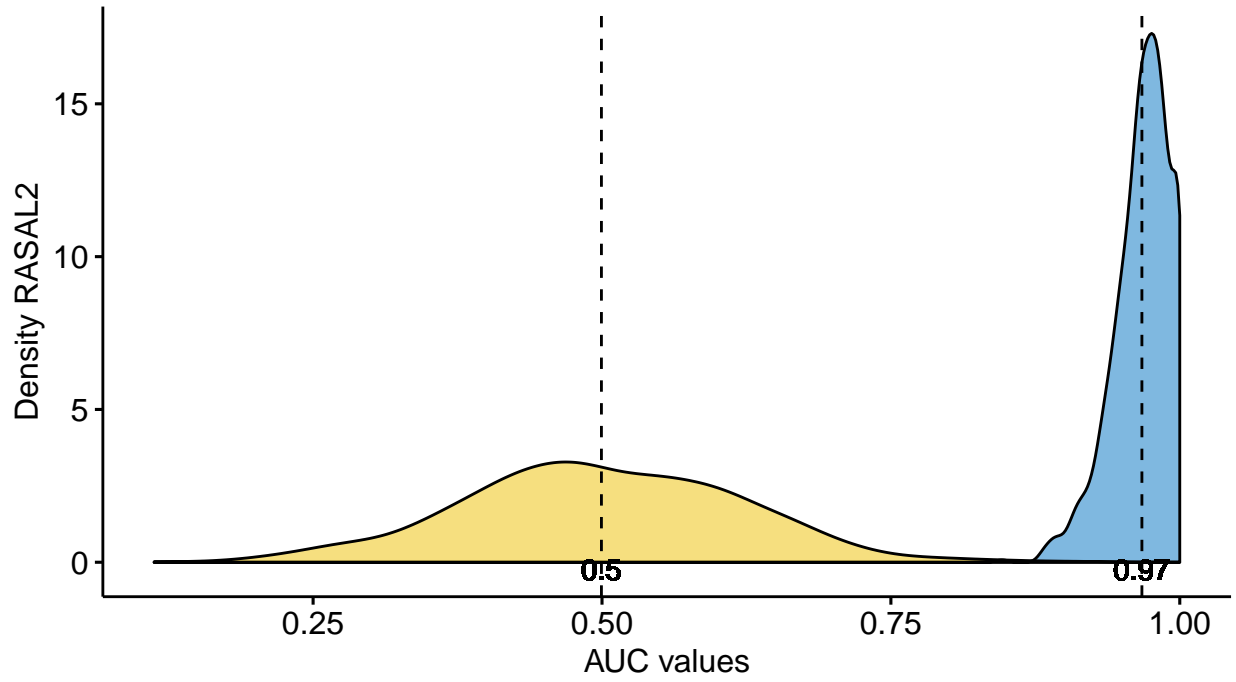

Permuted versus real model, density plot of AUC curve of SLPI

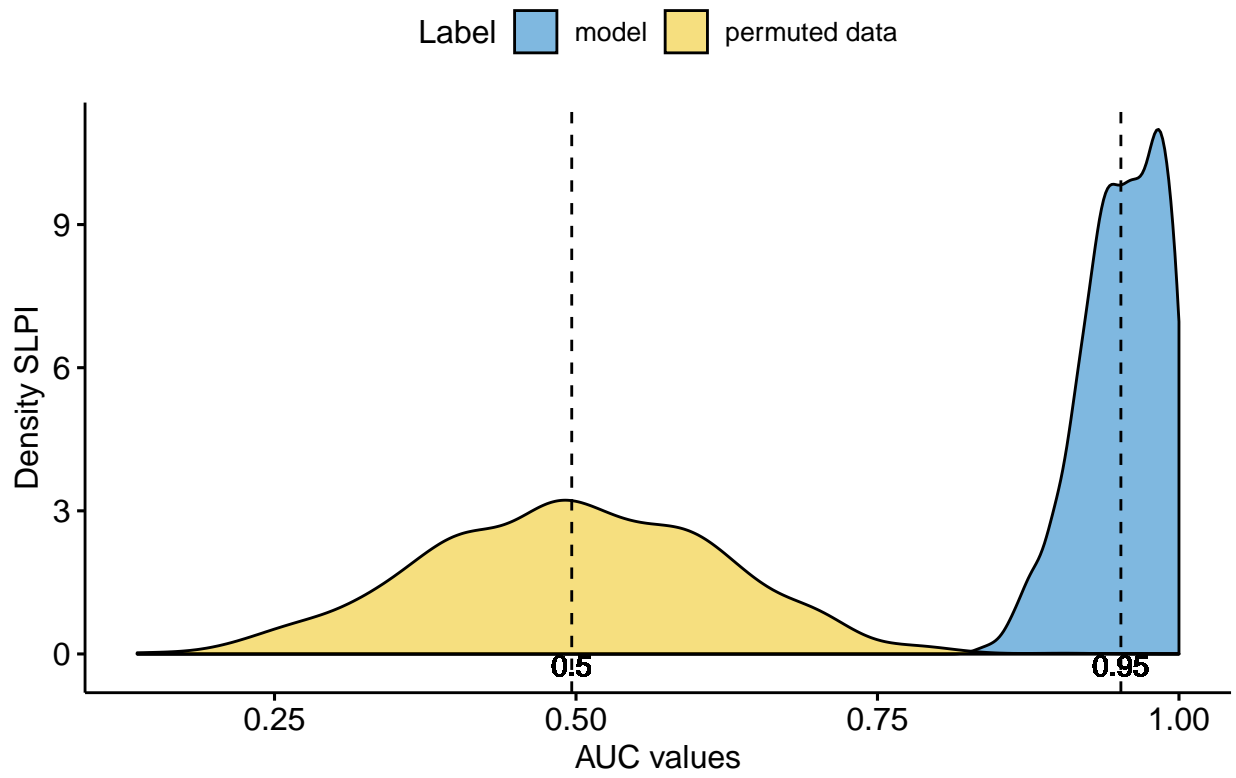

# Permuted versus real model, density plot of AUC curve of ADAMTS12

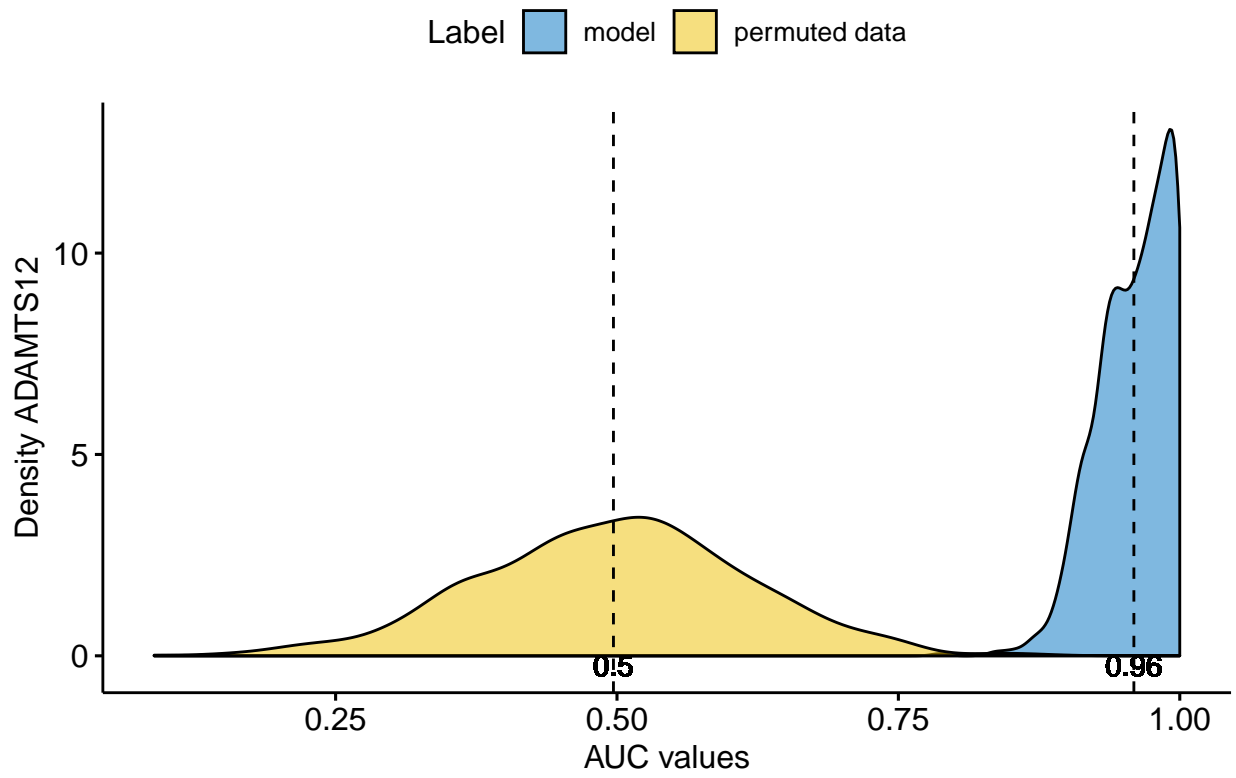

# Permuted versus real model, density plot of AUC curve of THBS2

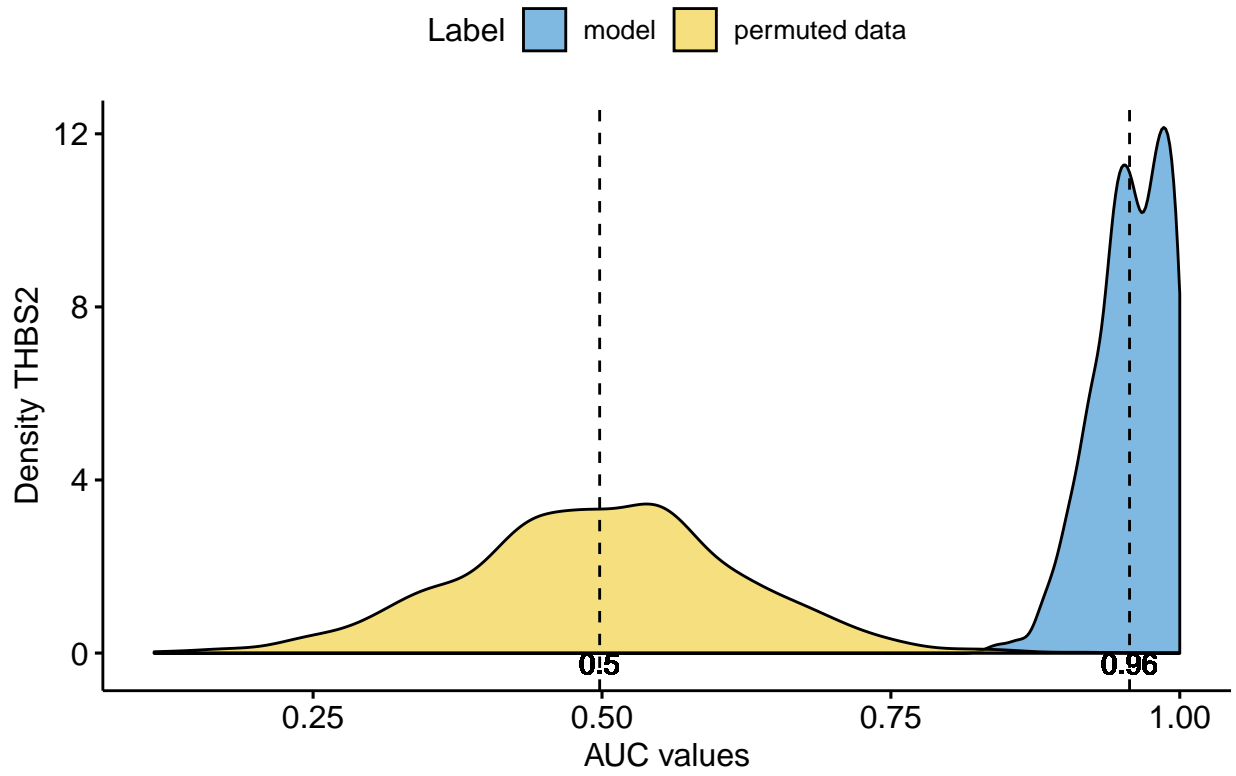



Permuted versus real model, density plot of AUC curve of VCAN

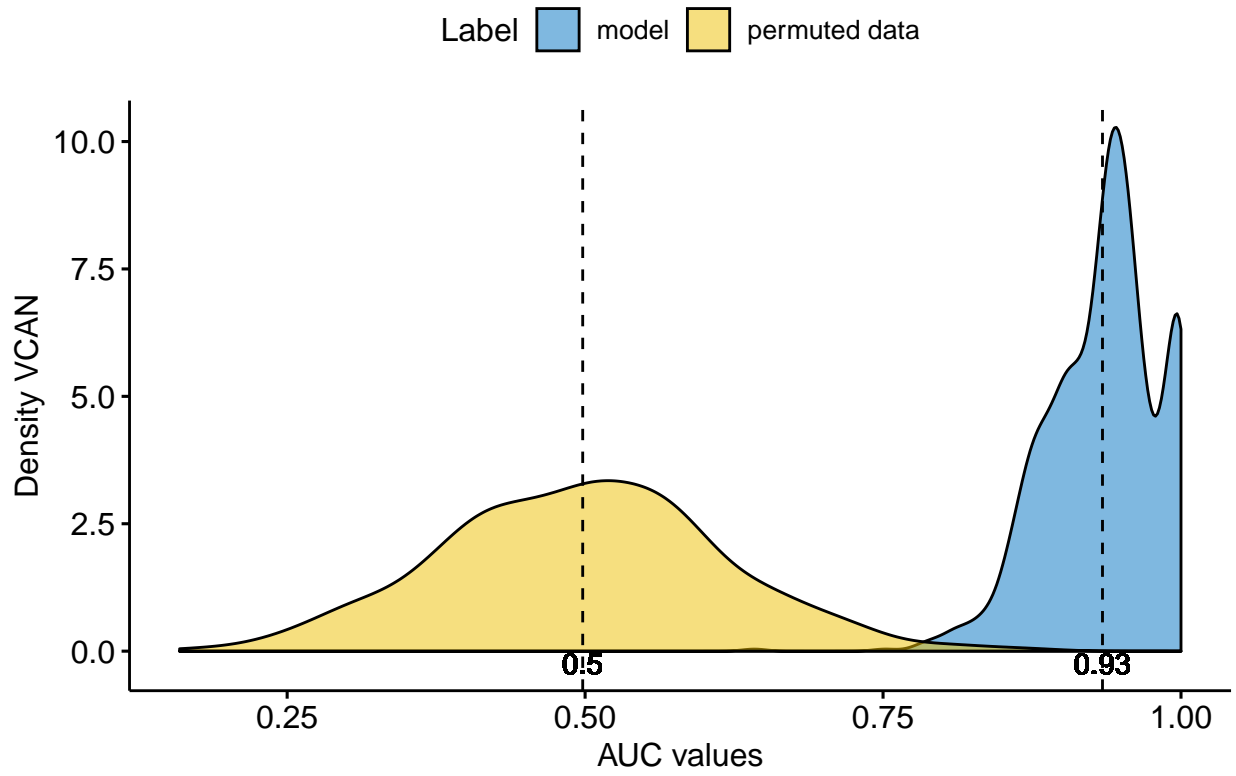

Permuted versus real model, density plot of AUC curve of LTBP1

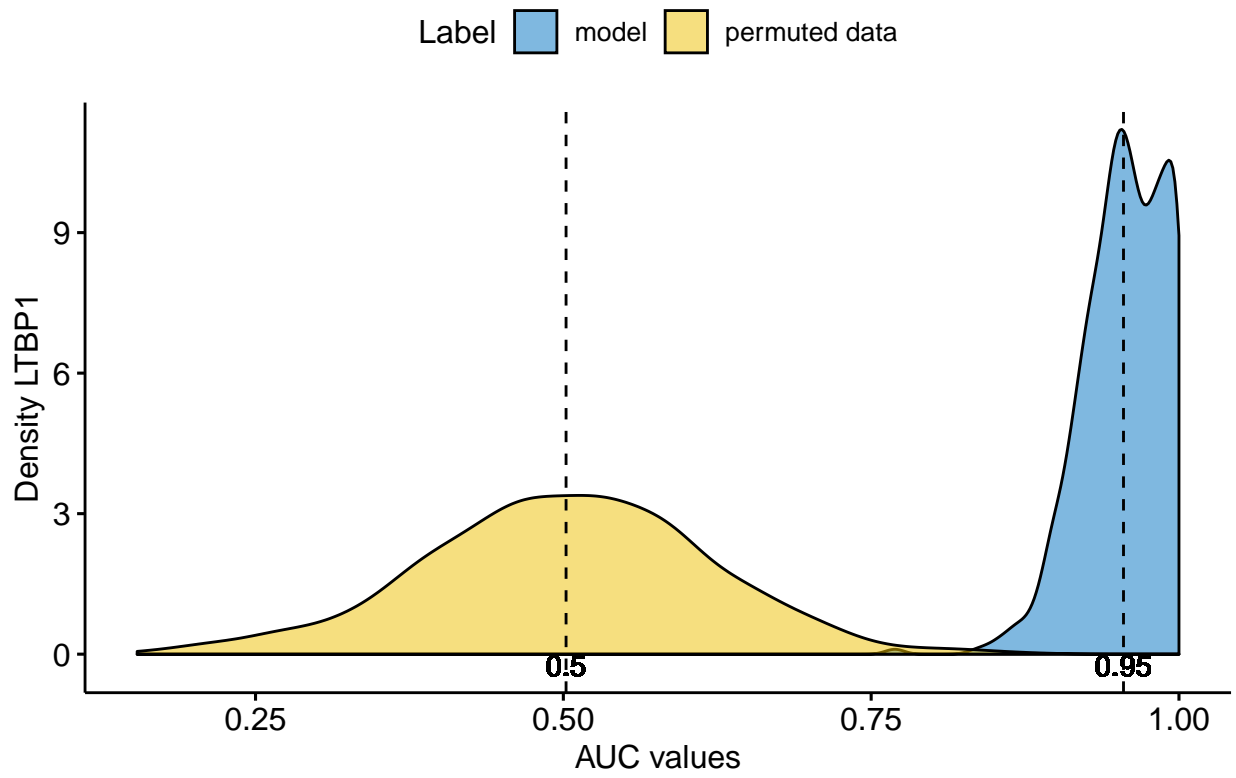

Permuted versus real model, density plot of AUC curve of AEBP1

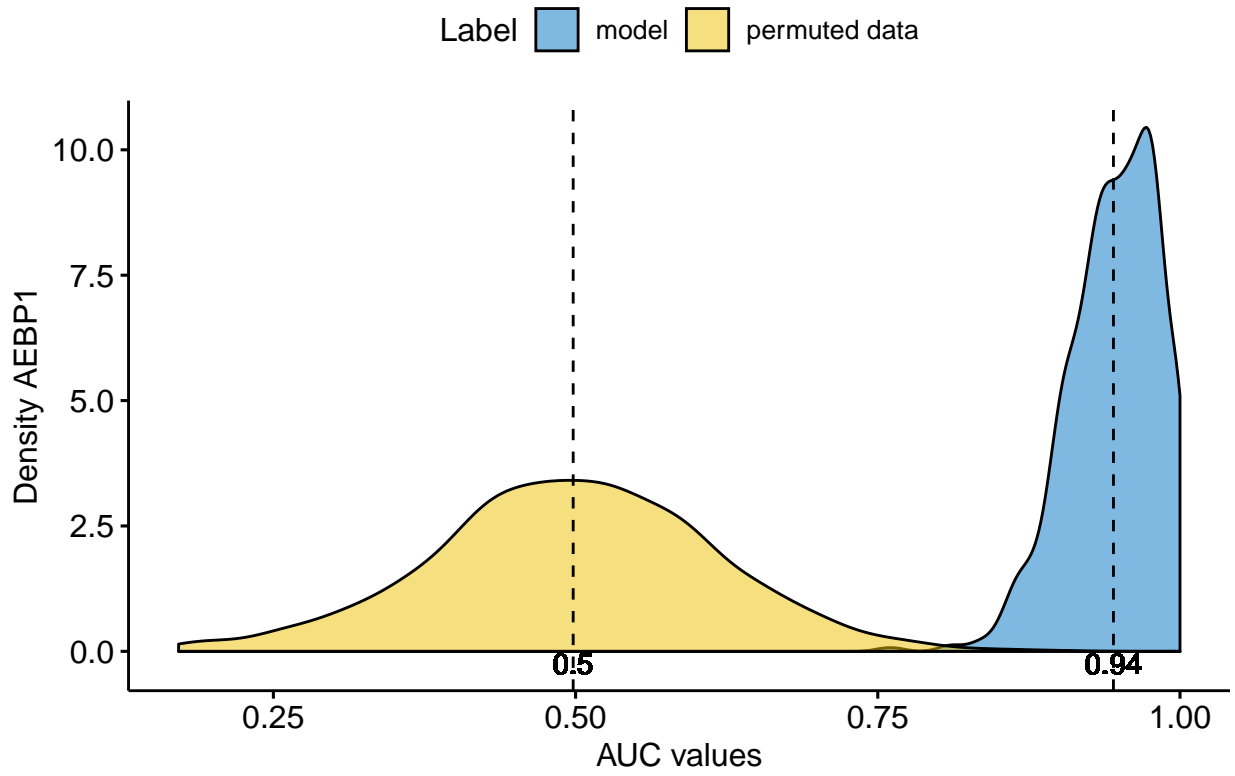

# Permuted versus real model, density plot of AUC curve of MIR34AH

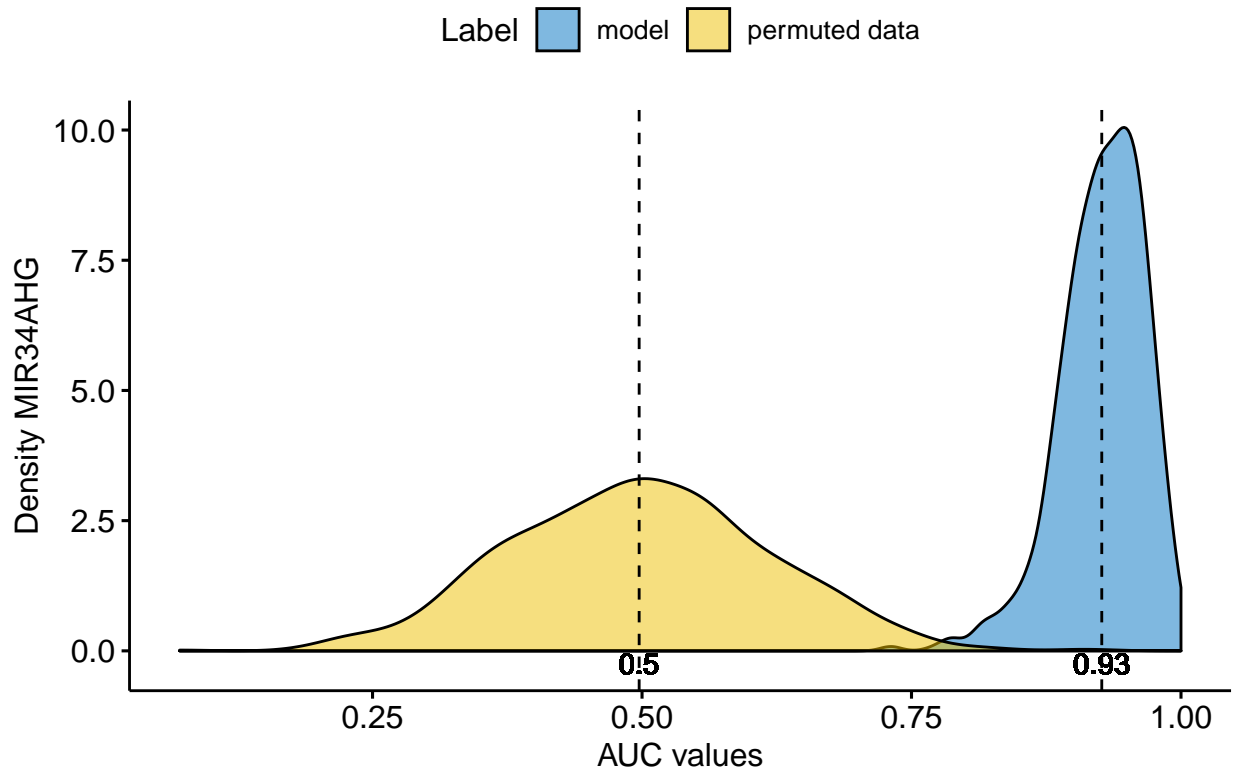

## Permuted versus real model, density plot of AUC curve of KRT7

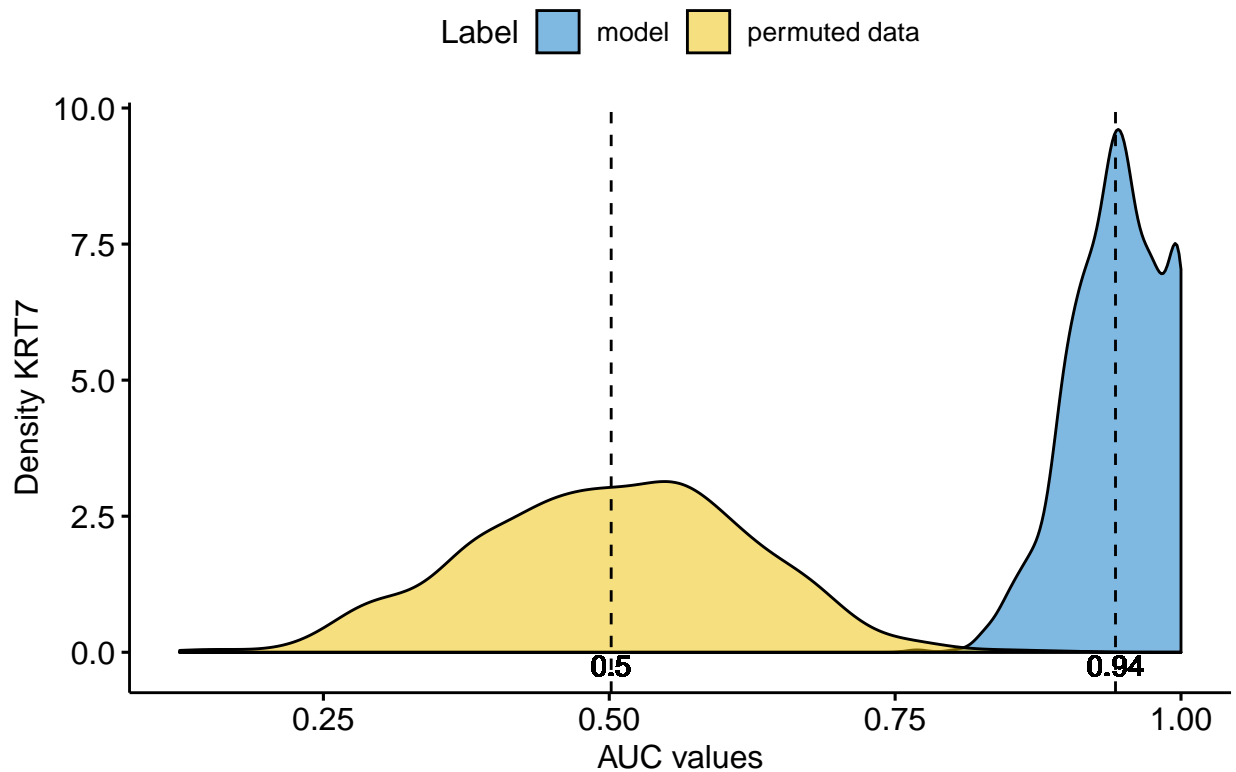

```
n <- length(plot)

# ###Accuracy, Precision etc
#
plot3<-list()
plot4<-list()
Data<-c("Accuracy", "Sensitivity", "Specificity", "Precision")
##### End Block 6

##### Begin Block 7

#
#Accuracy
Mono<-NULL
MonoR<-NULL
for (s in 1:(NumVar-1)){
  for (d in 1:4){
    for (j in 1:N){
      Mono1<-data.frame(Mono=MatsinglePlus[s,j][[1]][[d]])
      Mono<-rbind(Mono, Mono1)
      Mono1R<-data.frame(MonoR=MatsinglePlusR[s,j][[1]][[d]])
      MonoR<-rbind(MonoR, Mono1R)
    }
  }
  MonoLab<-data.frame(Mono=Mono, Label=as.factor(c(rep("model", dim(Mono)[1]))))
  MonoLabR<-data.frame(Mono=MonoR, Label=as.factor(c(rep("permuted data", dim(MonoR)[1]))))
  colnames(MonoLabR)[1]<-c("Mono")
}
```

```

Means<-data.frame(Mean=mean(MonoLab$Mono),MeanR=mean(MonoLabR$Mono))
Mono<-rbind(MonoLab,MonoLabR)
plot3[[d]]<-ggdensity(Mono, x = "Mono", fill = "Label", palette = "jco")+labs(title= paste("Value : 
Mono<-NULL
MonoR<-NULL

}
print(grid.arrange(plot3[[2]], plot3[[3]],plot3[[4]],plot3[[1]], ncol=2))
}

```

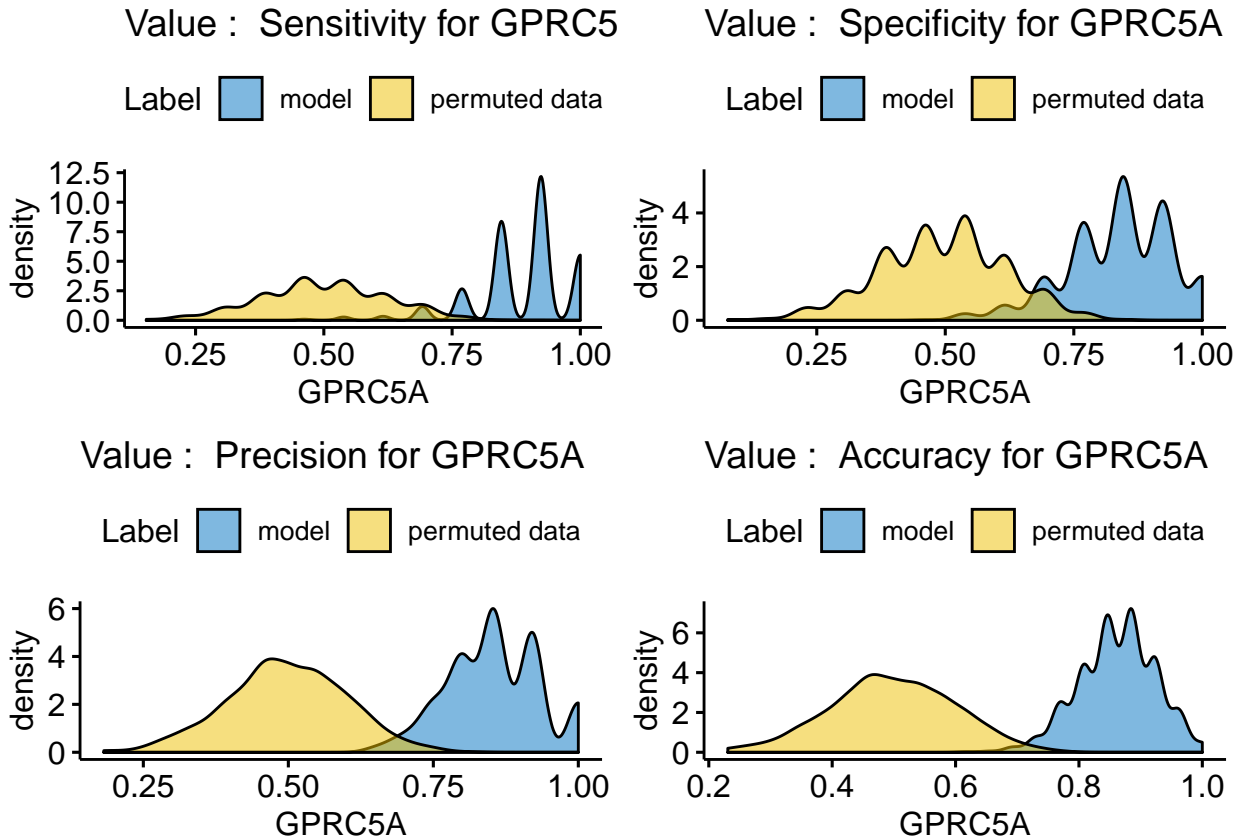

```

## TableGrob (2 x 2) "arrange": 4 grobs
##   z      cells  name      grob
## 1 1 (1-1,1-1) arrange gtable[layout]
## 2 2 (1-1,2-2) arrange gtable[layout]
## 3 3 (2-2,1-1) arrange gtable[layout]
## 4 4 (2-2,2-2) arrange gtable[layout]

```

Value : Sensitivity for CAPG

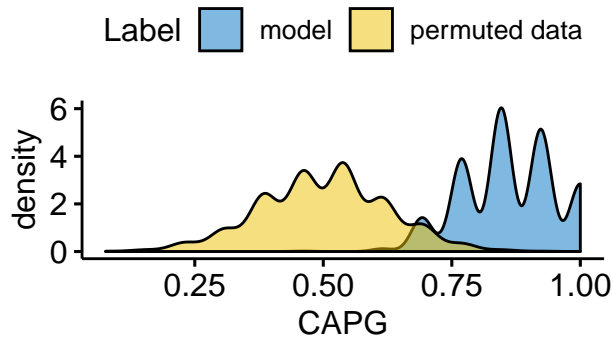

Value : Specificity for CAPG

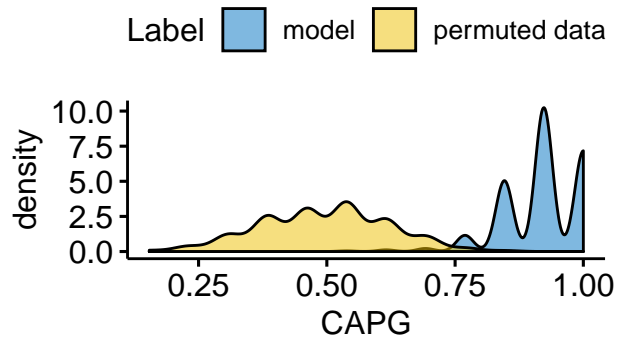

Value : Precision for CAPG

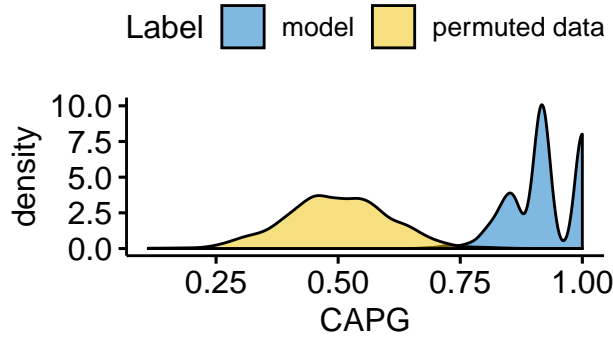

Value : Accuracy for CAPG

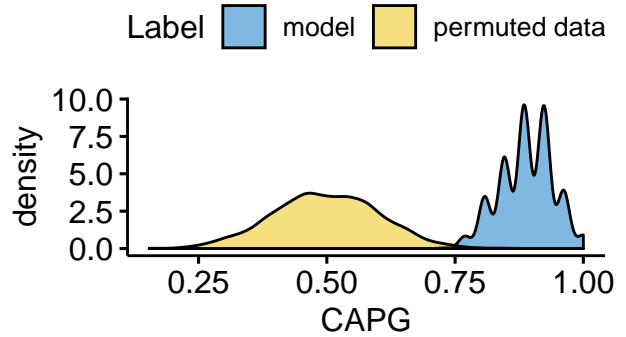

```
## TableGrob (2 x 2) "arrange": 4 grobs
##   z   cells   name      grob
## 1 1 (1-1,1-1) arrange gtable[layout]
## 2 2 (1-1,2-2) arrange gtable[layout]
## 3 3 (2-2,1-1) arrange gtable[layout]
## 4 4 (2-2,2-2) arrange gtable[layout]
```

Value : Sensitivity for INHBA

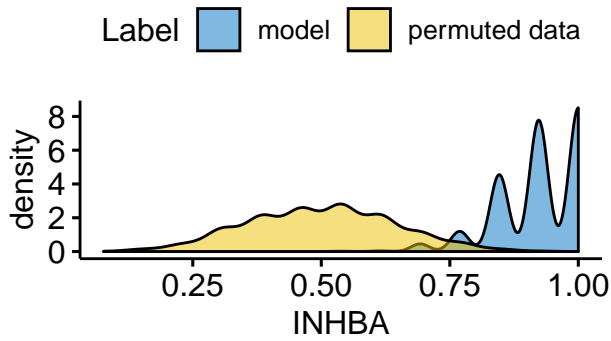

Value : Specificity for INHBA

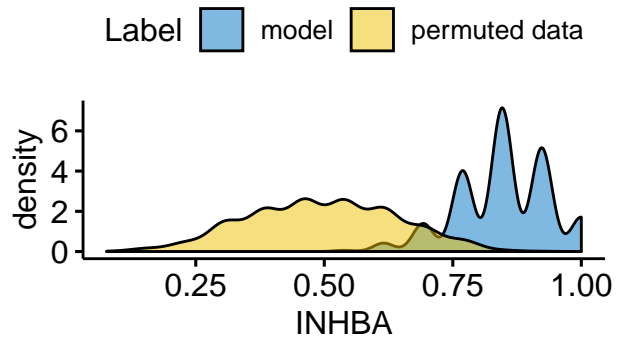

Value : Precision for INHBA

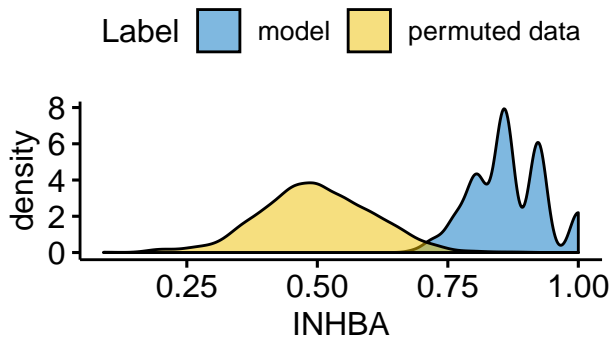

Value : Accuracy for INHBA

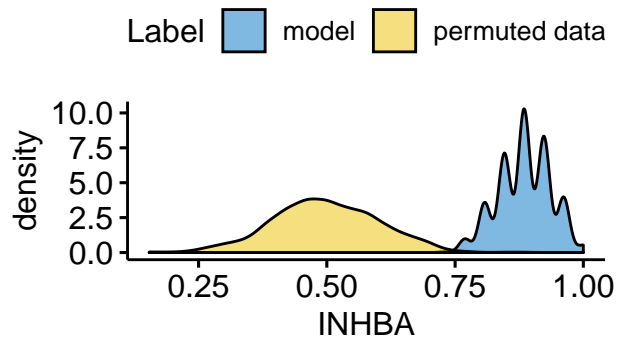

```
## TableGrob (2 x 2) "arrange": 4 grobs
##   z   cells   name      grob
## 1 1 (1-1,1-1) arrange gtable[layout]
## 2 2 (1-1,2-2) arrange gtable[layout]
## 3 3 (2-2,1-1) arrange gtable[layout]
## 4 4 (2-2,2-2) arrange gtable[layout]
```



Value : Sensitivity for COL8A1

Label ■ model ■ permuted data

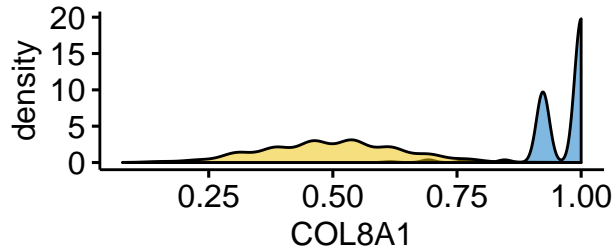

Value : Specificity for COL8A1

Label ■ model ■ permuted data

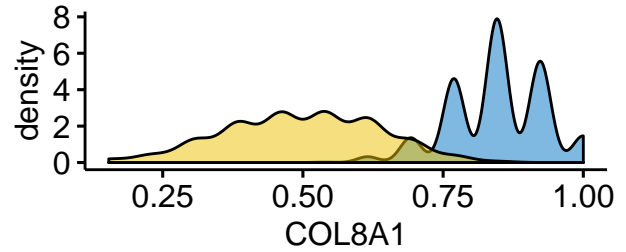

Value : Precision for COL8A1

Label ■ model ■ permuted data

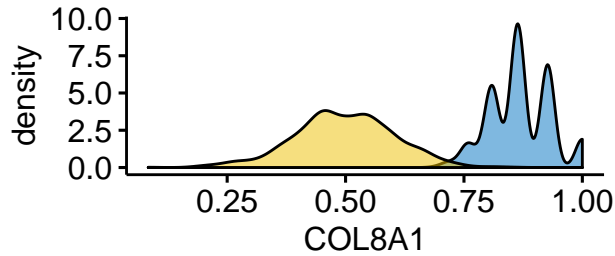

Value : Accuracy for COL8A1

Label ■ model ■ permuted data

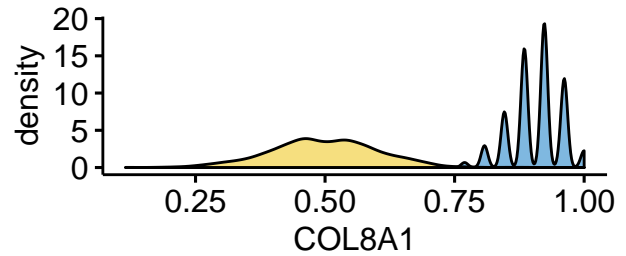

```
## TableGrob (2 x 2) "arrange": 4 grobs
##   z   cells   name      grob
## 1 1 (1-1,1-1) arrange gtable[layout]
## 2 2 (1-1,2-2) arrange gtable[layout]
## 3 3 (2-2,1-1) arrange gtable[layout]
## 4 4 (2-2,2-2) arrange gtable[layout]
```

Value : Sensitivity for SULF1

Label ■ model ■ permuted data

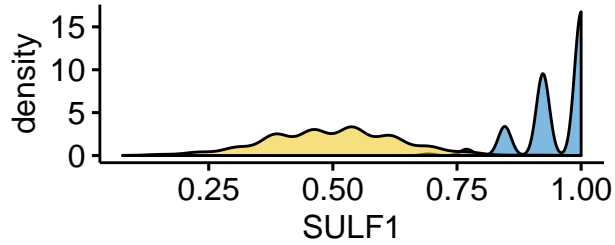

Value : Specificity for SULF1

Label ■ model ■ permuted data

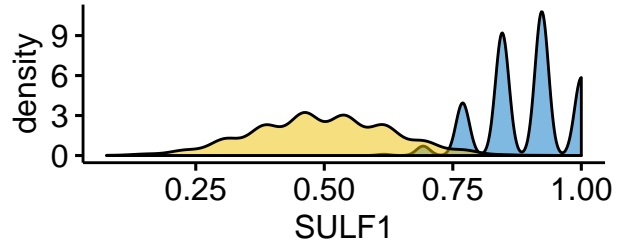

Value : Precision for SULF1

Label ■ model ■ permuted data

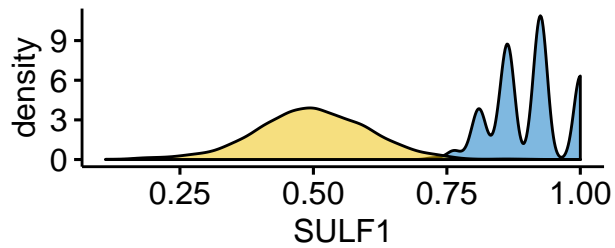

Value : Accuracy for SULF1

Label ■ model ■ permuted data

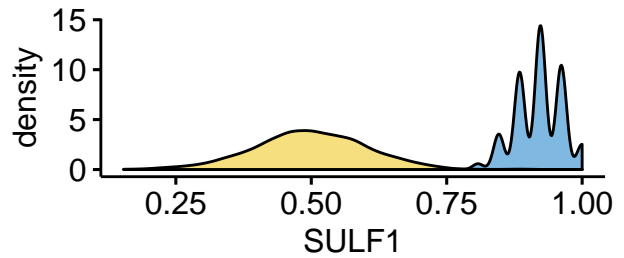

```
## TableGrob (2 x 2) "arrange": 4 grobs
##   z   cells   name      grob
## 1 1 (1-1,1-1) arrange gtable[layout]
## 2 2 (1-1,2-2) arrange gtable[layout]
## 3 3 (2-2,1-1) arrange gtable[layout]
## 4 4 (2-2,2-2) arrange gtable[layout]
```

Value : Sensitivity for RASAL:

Label ■ model ■ permuted data

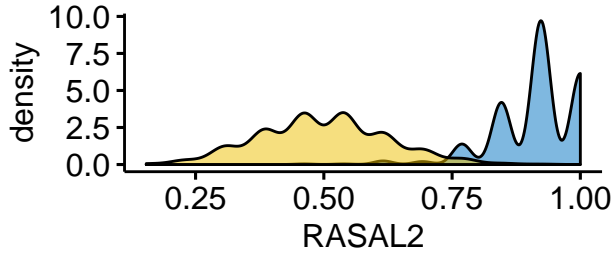

Value : Specificity for RASAL:

Label ■ model ■ permuted data

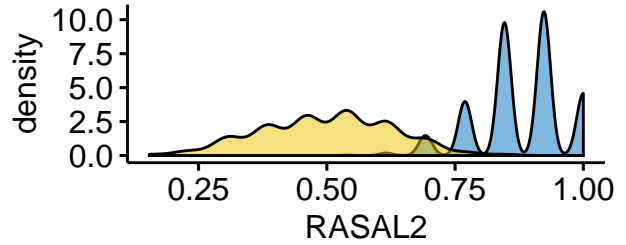

Value : Precision for RASAL2

Label ■ model ■ permuted data

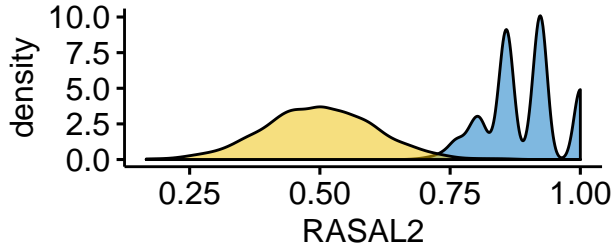

Value : Accuracy for RASAL2

Label ■ model ■ permuted data

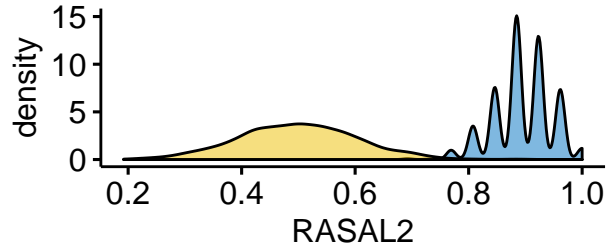

```
## TableGrob (2 x 2) "arrange": 4 grobs
##   z   cells  name      grob
## 1 1 (1-1,1-1) arrange gtable[layout]
## 2 2 (1-1,2-2) arrange gtable[layout]
## 3 3 (2-2,1-1) arrange gtable[layout]
## 4 4 (2-2,2-2) arrange gtable[layout]
```

Value : Sensitivity for SLPI

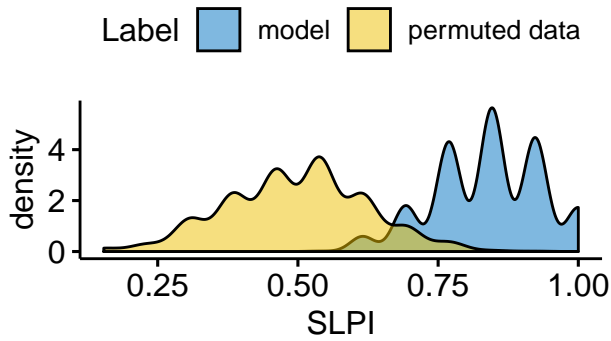

Value : Specificity for SLPI

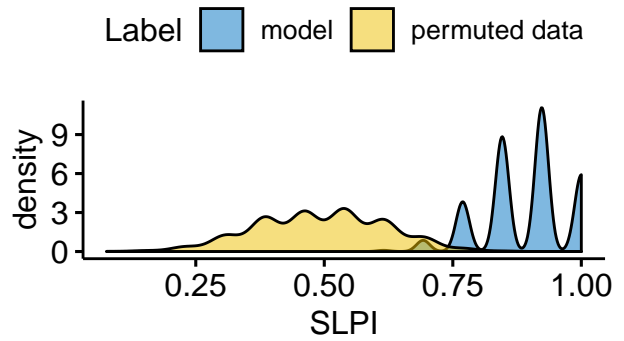

Value : Precision for SLPI

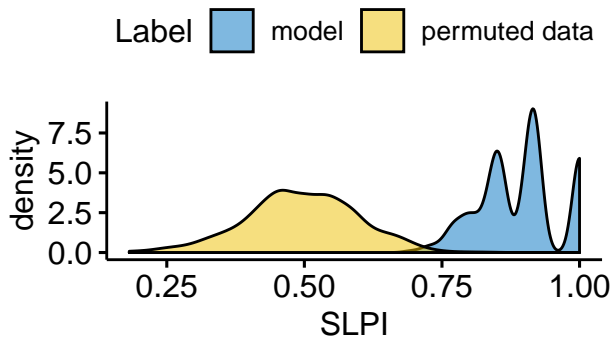

Value : Accuracy for SLPI

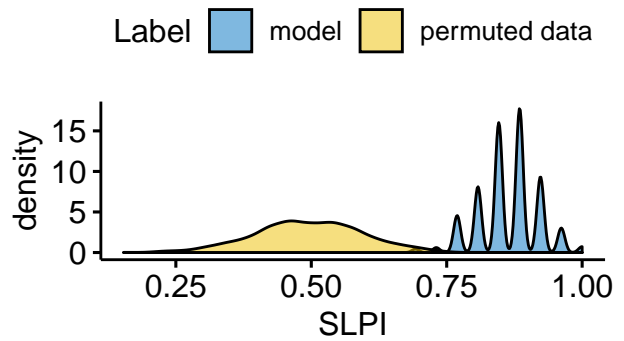

```
## TableGrob (2 x 2) "arrange": 4 grobs
##   z   cells   name      grob
## 1 1 (1-1,1-1) arrange gtable[layout]
## 2 2 (1-1,2-2) arrange gtable[layout]
## 3 3 (2-2,1-1) arrange gtable[layout]
## 4 4 (2-2,2-2) arrange gtable[layout]
```

Value : Sensitivity for ADAMTS1

Label ■ model ■ permuted data

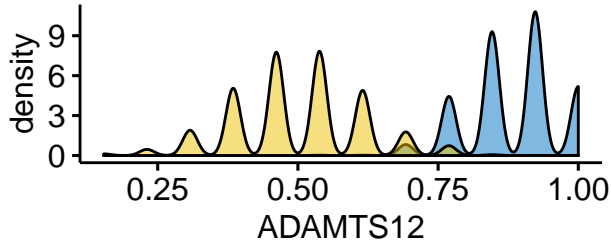

Value : Specificity for ADAMTS

Label ■ model ■ permuted data

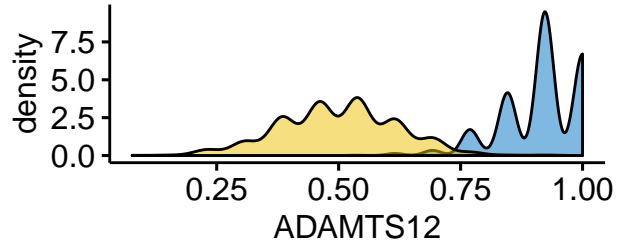

Value : Precision for ADAMTS

Label ■ model ■ permuted data

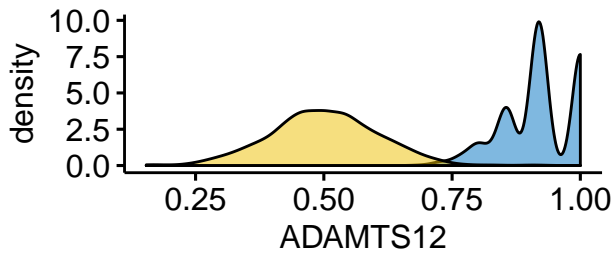

Value : Accuracy for ADAMTS1

Label ■ model ■ permuted data

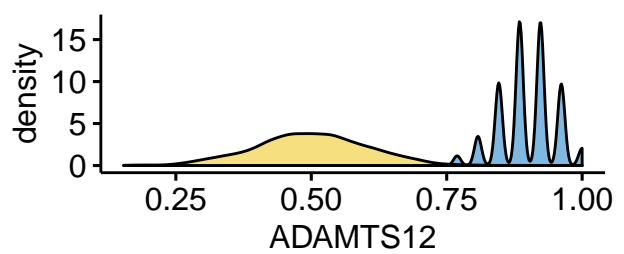

```
## TableGrob (2 x 2) "arrange": 4 grobs
##   z   cells  name      grob
## 1 1 (1-1,1-1) arrange gtable[layout]
## 2 2 (1-1,2-2) arrange gtable[layout]
## 3 3 (2-2,1-1) arrange gtable[layout]
## 4 4 (2-2,2-2) arrange gtable[layout]
```

Value : Sensitivity for THBS2

Label ■ model ■ permuted data

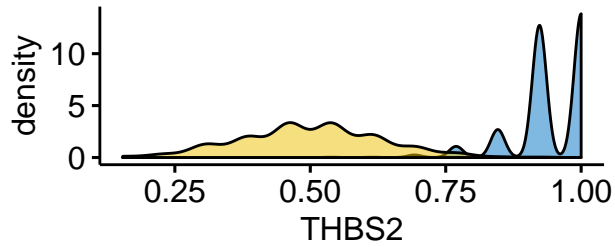

Value : Specificity for THBS2

Label ■ model ■ permuted data

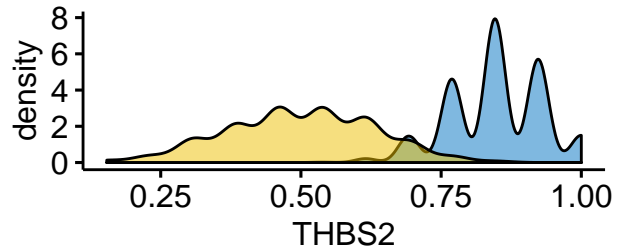

Value : Precision for THBS2

Label ■ model ■ permuted data

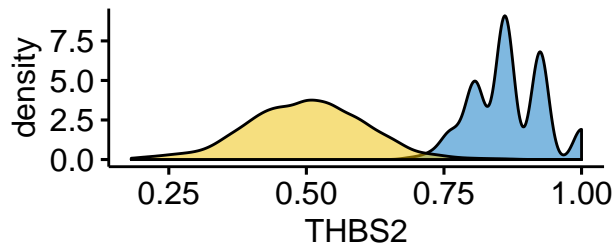

Value : Accuracy for THBS2

Label ■ model ■ permuted data

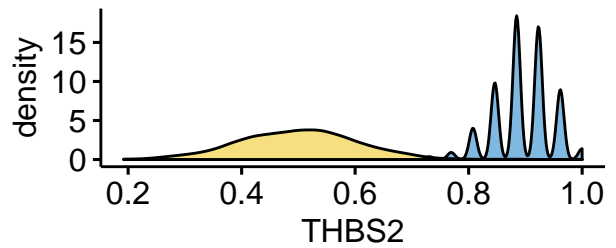

```
## TableGrob (2 x 2) "arrange": 4 grobs
##   z   cells   name      grob
## 1 1 (1-1,1-1) arrange gtable[layout]
## 2 2 (1-1,2-2) arrange gtable[layout]
## 3 3 (2-2,1-1) arrange gtable[layout]
## 4 4 (2-2,2-2) arrange gtable[layout]
```

Value : Sensitivity for VCAN

Label ■ model ■ permuted data

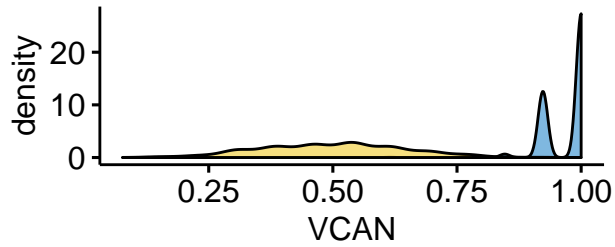

Value : Specificity for VCAN

Label ■ model ■ permuted data

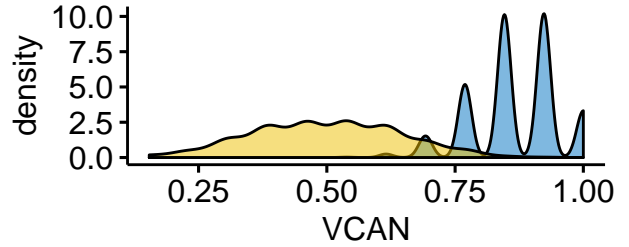

Value : Precision for VCAN

Label ■ model ■ permuted data

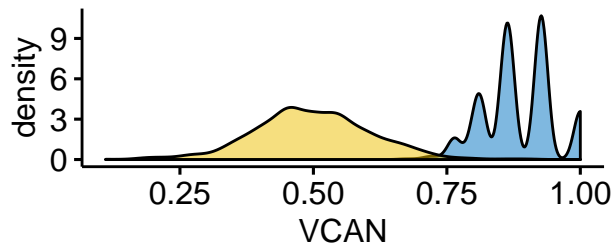

Value : Accuracy for VCAN

Label ■ model ■ permuted data

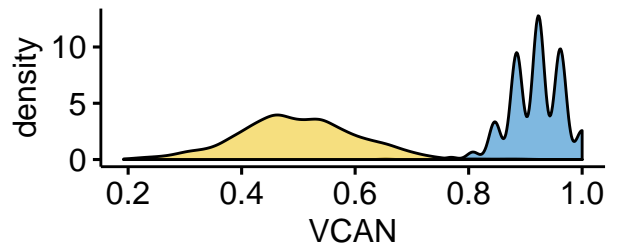

```
## TableGrob (2 x 2) "arrange": 4 grobs
##   z   cells   name      grob
## 1 1 (1-1,1-1) arrange gtable[layout]
## 2 2 (1-1,2-2) arrange gtable[layout]
## 3 3 (2-2,1-1) arrange gtable[layout]
## 4 4 (2-2,2-2) arrange gtable[layout]
```

Value : Sensitivity for LTBP1

Label ■ model ■ permuted data

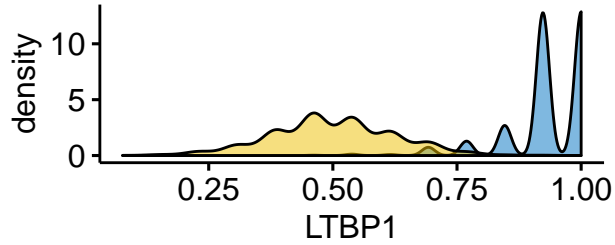

Value : Specificity for LTBP1

Label ■ model ■ permuted data

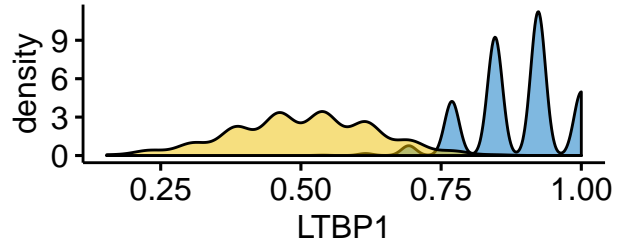

Value : Precision for LTBP1

Label ■ model ■ permuted data

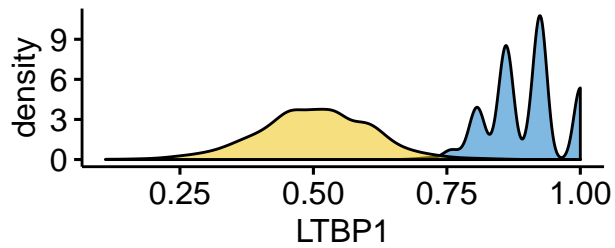

Value : Accuracy for LTBP1

Label ■ model ■ permuted data

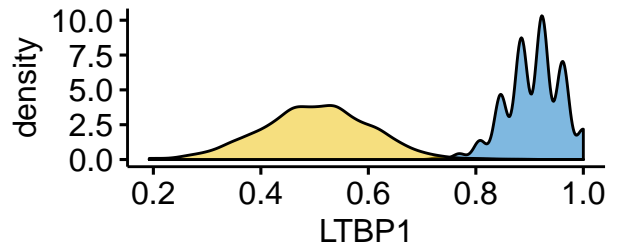

```
## TableGrob (2 x 2) "arrange": 4 grobs
##   z   cells  name      grob
## 1 1 (1-1,1-1) arrange gtable[layout]
## 2 2 (1-1,2-2) arrange gtable[layout]
## 3 3 (2-2,1-1) arrange gtable[layout]
## 4 4 (2-2,2-2) arrange gtable[layout]
```



Value : Sensitivity for AEBP1

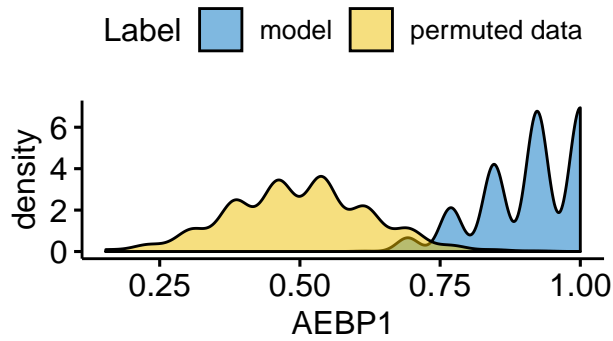

Value : Specificity for AEBP1

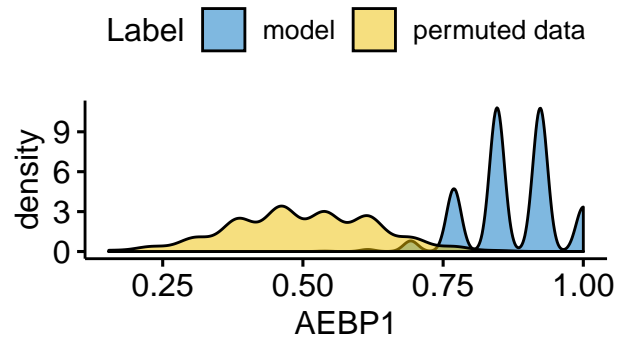

Value : Precision for AEBP1

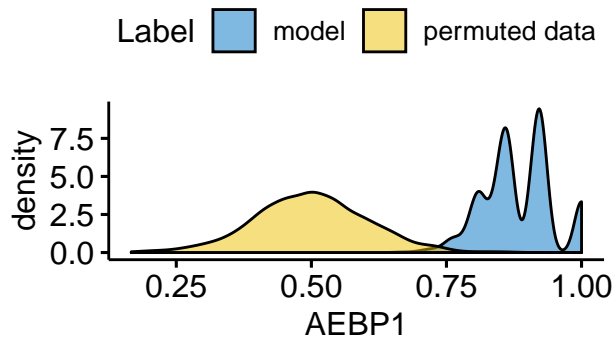

Value : Accuracy for AEBP1

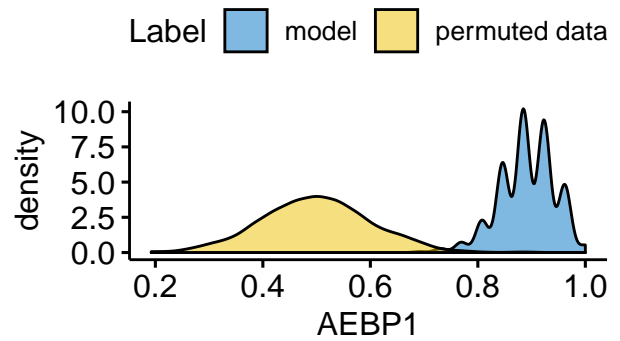

```
## TableGrob (2 x 2) "arrange": 4 grobs
##   z   cells   name      grob
## 1 1 (1-1,1-1) arrange gtable[layout]
## 2 2 (1-1,2-2) arrange gtable[layout]
## 3 3 (2-2,1-1) arrange gtable[layout]
## 4 4 (2-2,2-2) arrange gtable[layout]
```

Value : Sensitivity for MIR34AHG

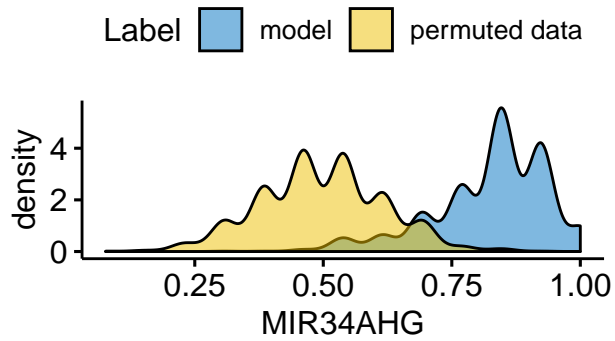

Value : Specificity for MIR34AHG

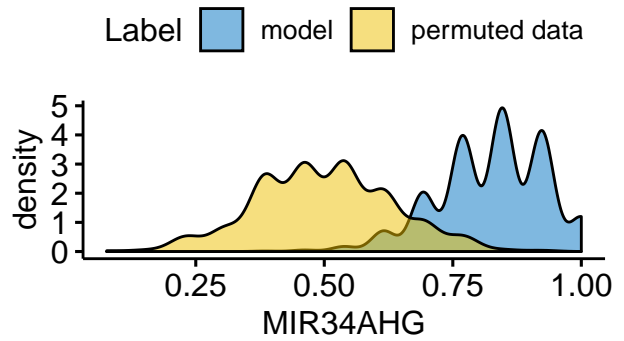

Value : Precision for MIR34AHG

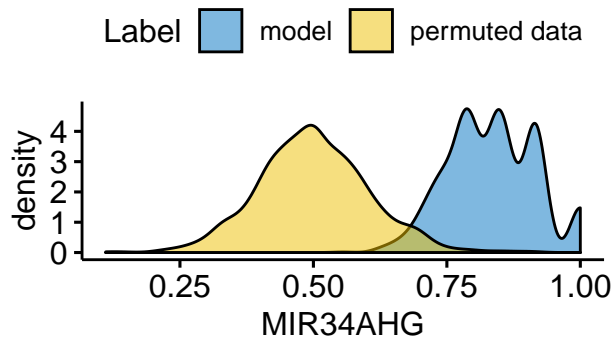

Value : Accuracy for MIR34AHG

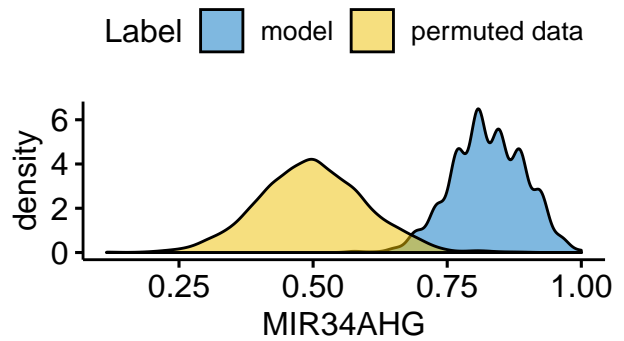

```
## TableGrob (2 x 2) "arrange": 4 grobs
##   z   cells   name      grob
## 1 1 (1-1,1-1) arrange gtable[layout]
## 2 2 (1-1,2-2) arrange gtable[layout]
## 3 3 (2-2,1-1) arrange gtable[layout]
## 4 4 (2-2,2-2) arrange gtable[layout]
```

Value : Sensitivity for KRT7

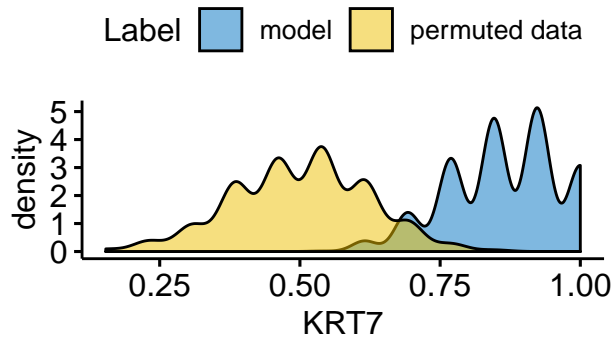

Value : Specificity for KRT7

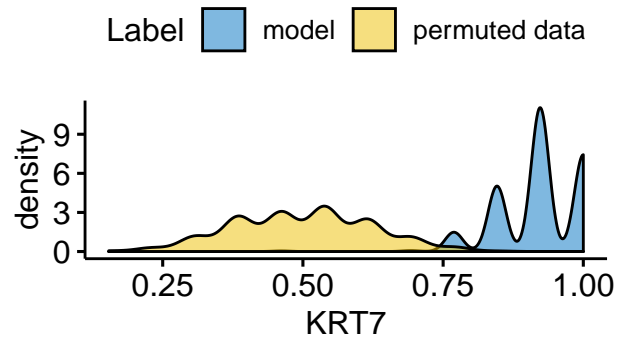

Value : Precision for KRT7

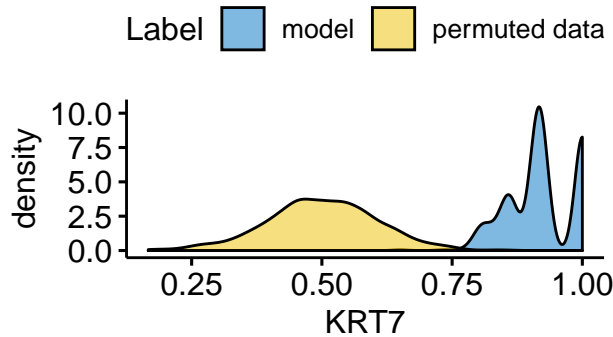

Value : Accuracy for KRT7

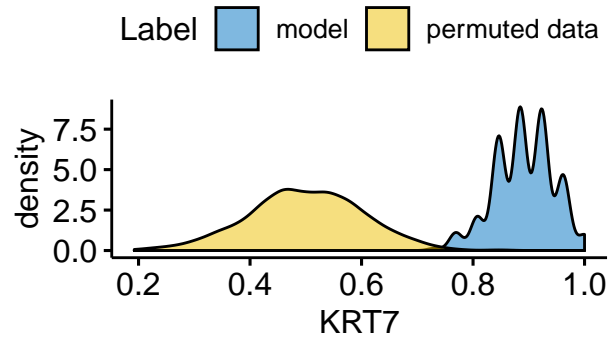

```
## TableGrob (2 x 2) "arrange": 4 grobs
## z      cells  name      grob
## 1 1 (1-1,1-1) arrange gtable[layout]
## 2 2 (1-1,2-2) arrange gtable[layout]
## 3 3 (2-2,1-1) arrange gtable[layout]
## 4 4 (2-2,2-2) arrange gtable[layout]
```

```
Meanq<-data.frame(multipleAUC$Means,multipleAUCR$Means)
MA<-data.frame(Mono=t(multipleAUC[1:dim(multipleAUC)[2]-1]))
MA["Label"]<-as.factor(c(rep("model",dim(MA)[1])))
MAR<-data.frame(Mono=t(multipleAUCR[1:dim(multipleAUCR)[2]-1]))
MAR["Label"]<-as.factor(c(rep("permuted data",dim(MAR)[1])))
Mono<-rbind(MA,MAR)
pp<-ggdensity(Mono, x = "Mono", fill = "Label", palette = "jco")+geom_vline(xintercept=Meanq[1,1],linetype=2,color="black",show.legend = TRUE)
print(pp+geom_vline(xintercept=Meanq[1,2],linetype = 2,color="black",show.legend = TRUE))
```

## AUC curve of GLM Multiple c("GPRC5A", "CAPG", "INHBA", "COL8)

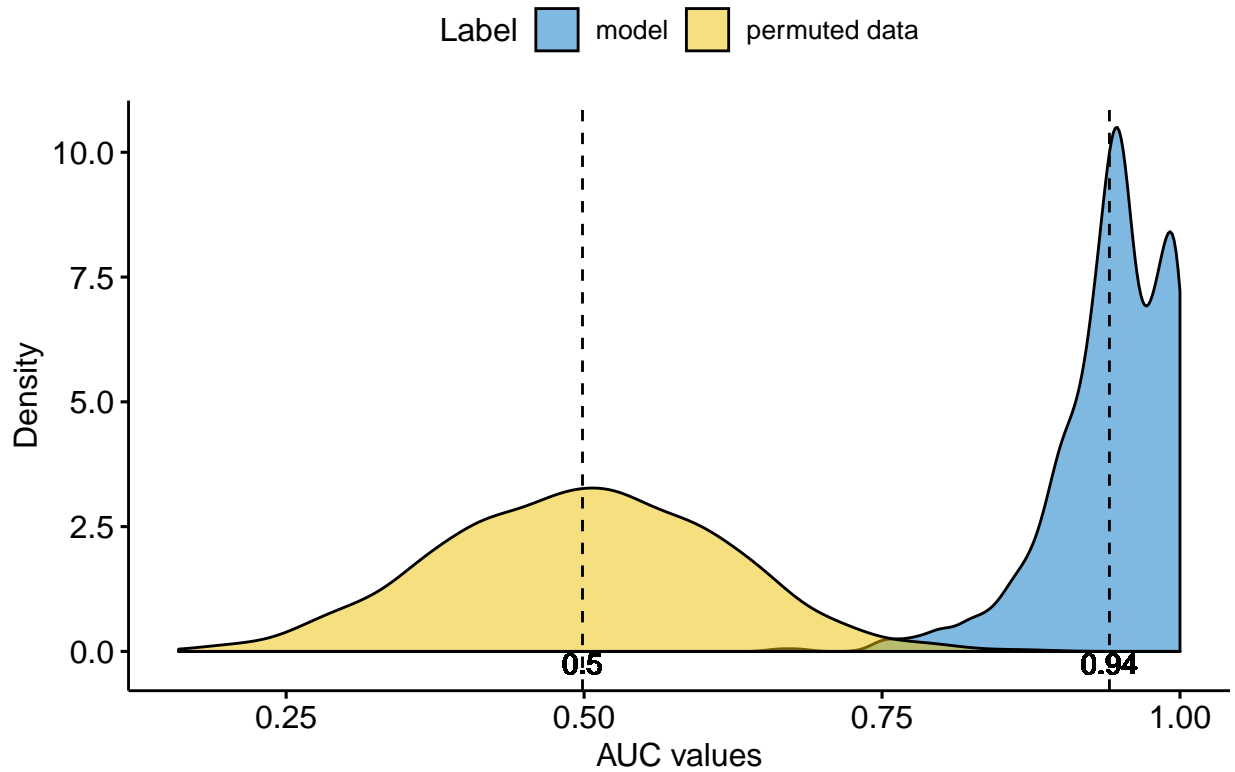

```
Meanq<-data.frame(multipleAUCNB$Means,multipleAUCNBR$Means)
MA<-data.frame(Mono=t(multipleAUCNB[1:dim(multipleAUCNB)[2]-1]))
MA["Label"]<-as.factor(c(rep("model",dim(MA)[1])))
MAR<-data.frame(Mono=t(multipleAUCNBR[1:dim(multipleAUCNBR)[2]-1]))
MAR["Label"]<-as.factor(c(rep("permuted data",dim(MAR)[1])))
Mono<-rbind(MA,MAR)
pp<-ggdensity(Mono, x = "Mono", fill = "Label", palette = "jco")+geom_vline(xintercept=Meanq[1,1],linetype="dashed",color="black",show.legend=FALSE)
print(pp+geom_vline(xintercept=Meanq[1,2],linetype = 2,color="black",show.legend = TRUE))
```

## AUC curve of NB Multiple c("GPRC5A", "CAPG", "INHBA", "COL8A1")

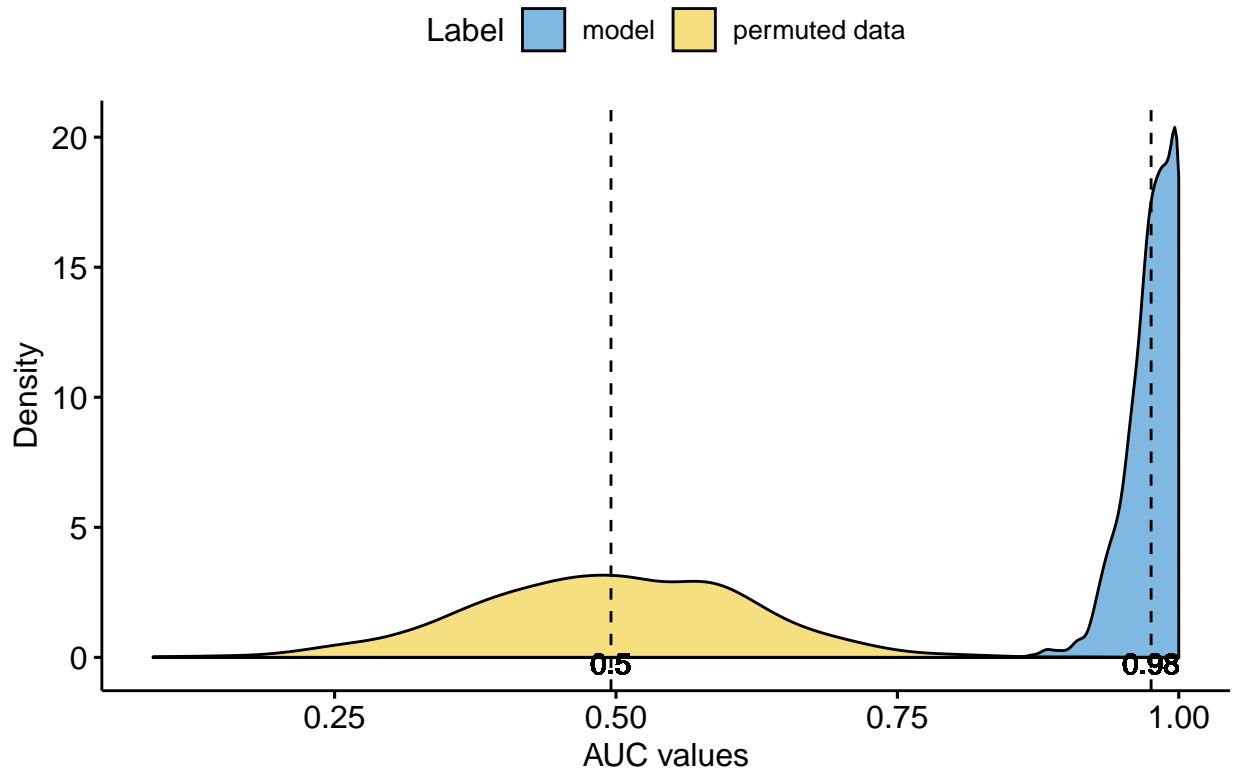

```
ee<-regex(names, ".")
```

```
Final<-data.frame(MultiNB=t(multipleAUCNB),MultiNBRand=t(multipleAUCNBR),Multi=t(multipleAUC),MultiRand=
FinalMeans<-data.frame(MultiNB=multipleAUCNB$Means,MultiNBRand=multipleAUCNBR$Means,Multi=multipleAUC$M
```

```
##### End Block 7
```

```
genes_to_network <- colnames(Betas_select)[-length(colnames(Betas_select))]
genes_to_networkStrict <- colnames(Betas_select2)[-length(colnames(Betas_select2))]
```

```
sink("genes_to_network.txt")
cat("Beta_Select_Intial")
```

```
## Beta_Select_Intial
```

```
cat("\n")
```

```
cat(genes_to_network, sep = "\n")
```

```
## SULF1
## INHBA
## COL10A1
## COL8A1
## FN1
## NTM
```

```
## NOX4
## THBS2
## ADAMTS12
## RASAL2
## CAPG
## FAP
## CTHRC1
## VCAN
## WISP1
## TIMP1
## LTBP1
## SLPI
## GPRC5A
## MIR34AHG
## AEBP1
## KRT7
```

```
cat("Beta_Select_Threshold")
```

```
## Beta_Select_Threshold
```

```
cat("\n")
```

```
cat(genes_to_networkStrict, sep = "\n")
```

```
## GPRC5A
## CAPG
## INHBA
## COL8A1
## SULF1
## RASAL2
## SLPI
## ADAMTS12
## THBS2
## VCAN
## LTBP1
## AEBP1
## MIR34AHG
## KRT7
```

```
sink()
```
