# Supplementary material for: -Omics biomarker identification pipeline for translational medicine
Source: J Transl Med. 2019 May 14;17:155. doi: 10.1186/s12967-019-1912-5 (PMC6518609; doi:10.1186/s12967-019-1912-5)
Supplement: Supplementary file 3 — Additional file 3. R Markdown analysis results from the workflow developed on GSE15061. [file 12967_2019_1912_MOESM3_ESM.pdf]

# AML Cancer Analysis

*Bravo, Williams, and Acharjee*

*19 Sept 2018*

*#Libraries*

##### Begin Block 1

```
setwd("~/AnimeshReview/LauraPaper/Journal of Translational Medicine /LauraFinal/")
library(readxl)
library(data.table)
library(tidyverse)
library(dplyr)
library(devtools)
library(ggcorrplot)
library(car)
library(ggpubr)
library(glmnet)
library(summarytools)
library(knitr)
library(htmltools)
library(corrplot)
library(caret)
library(factoextra)
library(Metrics)
library(readr)
library(gplots)
library(dplyr)
library(stringr)
library(readxl)
library(plotly)
library(e1071)
library(ggplot2)
library(reshape2)
library(multtest)
library(ROCR)
library(gridExtra)
library(MLmetrics)
```

#### Begin Load Laura's Functions

```
doubleAUCfun <- function(xtrain, ytrain,xtest,ytest,s,k) {

  yy3<-data.frame(Outcome=ytrain, Predictor=xtrain[,s],Predictor2=xtrain[,k])
  model3<-glm(Outcome~Predictor+Predictor2,data=yy3, family=binomial(link='logit'))
  new3<-data.frame(Predictor=xtest[,s],Predictor2=xtest[,k])
  p3<-predict(model3,new3,type="response")
  new5<-data.frame(Outcome=ytest)
  pr3 <- prediction(p3, new5)
```

```

prf3 <- performance(pr3, measure = "tpr", x.measure = "fpr")
auc3 <- performance(pr3, measure = "auc")
auc3 <- auc3@y.values[[1]]
result2<-auc3
}

doubleAUCfunNB <- function(xtrain, ytrain,xtest,ytest,s,k) {

  yy3<-data.frame(Outcome=ytrain, Predictor=xtrain[,s],Predictor2=xtrain[,k])
  model4<-naiveBayes(Outcome~Predictor+Predictor2,data=yy3)
  new4<-data.frame(Predictor=xtest[,s],Predictor2=xtest[,k])
  p4<-predict(model4,new4,type="raw")
  #without raw write confusion matrix directly
  prob2<-NULL
  for (i in 1:dim(p4)[1]){
    prob2[i]<-p4[i,2]/p4[i,1]
  }
  new5<-data.frame(Outcome=ytest)
  pr3 <- prediction(prob2, new5)
  prf3 <- performance(pr3, measure = "tpr", x.measure = "fpr")
  auc3 <- performance(pr3, measure = "auc")
  auc3 <- auc3@y.values[[1]]
  result2<-auc3
}

doubleAUCfunRFCross <- function(xtrain, ytrain,xtest,ytest,s,k) {

  yy3<-data.frame(Outcome=ytrain, Predictor=xtrain[,s],Predictor2=xtrain[,k])
  control <- trainControl(method="repeatedcv", number=10, repeats=3) #Is this the only thing needed f
  seed <- 7
  metric <- "Accuracy"
  set.seed(seed)
  #mtry <- 2
  tuneGrid <- expand.grid(.mtry=c(1:6))
  set.seed(seed)
  rf_default <- train(Outcome~Predictor+Predictor2,data=yy3, method="rf", metric=metric, tuneGrid=tune
  #print(rf_default)
  new4<-data.frame(Predictor=xtest[,s],Predictor2=xtest[,k])
  pred=predict(rf_default, new4,type="prob")
  pred2=predict(rf_default, new4)
  prob2<-NULL
  for (i in 1:dim(pred)[1]){
    prob2[i]<-pred[i,2]/pred[i,1]
  }
  new5<-data.frame(Outcome=ytest)
  pr3 <- prediction(prob2, new5)
  prf3 <- performance(pr3, measure = "tpr", x.measure = "fpr")
  auc3 <- performance(pr3, measure = "auc")
  auc3 <- auc3@y.values[[1]]
  result2<-auc3
}

```

```

doubleAUCfunSVM <- function(xtrain, ytrain,xtest,ytest,s,k) {

  yy3<-data.frame(Outcome=ytrain, Predictor=xtrain[,s],Predictor2=xtrain[,k])
  seed <- 7
  set.seed(seed)
  model3<-svm(Outcome~Predictor+Predictor2,data=yy3)
  new3<-data.frame(Predictor=xtest[,s],Predictor2=xtest[,k])
  p3<-predict(model3,new3,decision.values = TRUE)
  p4<-attr(p3,"decision.values")
  new5<-data.frame(Outcome=ytest)
  pr3<- prediction(p4, new5)
  #table(p3, new5)
  #confusionMatrix(p3, new5)
  prf3 <- performance(pr3, measure = "tpr", x.measure = "fpr")
  auc3 <- performance(pr3, measure = "auc")
  auc3 <- auc3@y.values[[1]]
  result2<-auc3
}

doubleAUCfunSVMCross <- function(xtrain, ytrain,xtest,ytest,s,k) {

  yy3<-data.frame(Outcome=ytrain, Predictor=xtrain[,s],Predictor2=xtrain[,k])
  seed <- 7
  set.seed(seed)
  model4<-svm(Outcome~Predictor+Predictor2,data=yy3,method="C-classification",
              kernel="radial", gamma = 0.01, cost = 100,cross=10, probability=TRUE)
  new4<-data.frame(Predictor=xtest[,s],Predictor2=xtest[,k])
  p4<-predict(model4,new4,decision.values = TRUE)
  p5<-attr(p4,"decision.values")
  new5<-data.frame(Outcome=ytest)
  pr3 <- prediction(p5, new5)
  prf3 <- performance(pr3, measure = "tpr", x.measure = "fpr")
  auc3 <- performance(pr3, measure = "auc")
  auc3 <- auc3@y.values[[1]]
  result2<-auc3
}

doublePlusfun <- function(xtrain, ytrain,xtest,ytest,s,k) {

  yy3<-data.frame(Outcome=ytrain, Predictor=xtrain[,s],Predictor2=xtrain[,k])
  model3<-glm(Outcome~Predictor+Predictor2,data=yy3, family=binomial(link='logit'))
  new3<-data.frame(Predictor=xtest[,s],Predictor2=xtest[,k])
  p3<-predict(model3,new3,type="response")
  new5<-data.frame(Outcome=ytest)
  pr <- prediction(p3, new5)
  Acc <- performance(pr, measure="acc")
  AccV<-Acc@y.values[[1]][max(which(Acc@x.values[[1]] >= 0.5))]
  Sens <- performance(pr, measure= "sens")
  SensV<-Sens@y.values[[1]][max(which(Sens@x.values[[1]] >= 0.5))]
  Spec <- performance(pr, measure= "spec")
  SpecV<-Spec@y.values[[1]][max(which(Spec@x.values[[1]] >= 0.5))]
  Prec <- performance(pr, measure= "prec")
  PrecV<-Prec@y.values[[1]][max(which(Prec@x.values[[1]] >= 0.5))]
}

```

```

AllV<-data.frame(Vector=c(AccV, SensV, SpecV, PrecV))
return(AllV)
}

doubleROCfun <- function(xtrain, ytrain,xtest,ytest,s,k) {

  yy3<-data.frame(Outcome=ytrain, Predictor=xtrain[,s],Predictor2=xtrain[,k])
  model3<-glm(Outcome~Predictor+Predictor2,data=yy3, family=binomial(link='logit'))
  new3<-data.frame(Predictor=xtest[,s],Predictor2=xtest[,k])
  p3<-predict(model3,new3,type="response")
  new5<-data.frame(Outcome=ytest)
  pr3 <- prediction(p3, new5)
  prf3 <- performance(pr3, measure = "tpr", x.measure = "fpr")
  result<-prf3
  auc3 <- performance(pr3, measure = "auc")
  auc3 <- auc3@y.values[[1]]
  return(result)
}

MeansNames <- function(doubleAUCR,trial){

  doubleAUCR<-as.data.frame(doubleAUCR)
  doubleAUCR<-mutate(doubleAUCR, Means=rowMeans(doubleAUCR))
  row.names(doubleAUCR)<-trial
  return(doubleAUCR)
}

multipleAUCfun <- function(xtrain,ytrain,xtest,ytest) {

  yy3<-data.frame(Outcome=ytrain,xtrain)
  model3<-glm(Outcome~.,data=yy3, family=binomial(link='logit'))
  new3<-data.frame(xtest)
  p3<-predict(model3,new3,type="response")
  new5<-data.frame(Outcome=ytest)
  pr3 <- prediction(p3, new5)
  prf3 <- performance(pr3, measure = "tpr", x.measure = "fpr")
  auc3 <- performance(pr3, measure = "auc")
  auc3 <- auc3@y.values[[1]]
  result2<-auc3
  return(result2)
}

multipleAUCfunNB <- function(xtrain, ytrain,xtest,ytest) {

  yy3<-data.frame(Outcome=ytrain,xtrain)
  model4<-naiveBayes(Outcome~.,data=yy3)
  new3<-data.frame(xtest)
  p4<-predict(model4,new3,type="raw")
  #without raw write confusion matrix directly
  prob2<-NULL
  for (i in 1:dim(p4)[1]){
    prob2[i]<-p4[i,2]/p4[i,1]
  }
}

```

```

}
new5<-data.frame(Outcome=ytest)
pr3 <- prediction(prob2, new5)
prf3 <- performance(pr3, measure = "tpr", x.measure = "fpr")
auc3 <- performance(pr3, measure = "auc")
auc3 <- auc3@y.values[[1]]
result2<-auc3
return(result2)
}

multipleROCfun <- function(xtrain,ytrain,xtest,ytest) {

  yy3<-data.frame(Outcome=ytrain,xtrain)
  model3<-glm(Outcome~.,data=yy3, family=binomial(link='logit'))
  new3<-data.frame(xtest)
  p3<-predict(model3,new3,type="response")
  new5<-data.frame(Outcome=ytest)
  pr3 <- prediction(p3, new5)
  prf3 <- performance(pr3, measure = "tpr", x.measure = "fpr")
  auc3 <- performance(pr3, measure = "auc")
  auc3 <- auc3@y.values[[1]]
  result2<-auc3
  return(prf3)
}

multipleROCfunNB <- function(xtrain, ytrain,xtest,ytest) {

  yy3<-data.frame(Outcome=ytrain,xtrain)
  model4<-naiveBayes(Outcome~.,data=yy3)
  new3<-data.frame(xtest)
  p4<-predict(model4,new3,type="raw")
  #without raw write confusion matrix directly
  prob2<-NULL
  for (i in 1:dim(p4)[1]){
    prob2[i]<-p4[i,2]/p4[i,1]
  }
  new5<-data.frame(Outcome=ytest)
  pr3 <- prediction(prob2, new5)
  prf3 <- performance(pr3, measure = "tpr", x.measure = "fpr")
  auc3 <- performance(pr3, measure = "auc")
  auc3 <- auc3@y.values[[1]]
  result2<-auc3
  return(prf3)
}

singleAUCfun <- function(xtrain, ytrain,xtest,ytest,s) {

  yy2<-data.frame(Outcome=ytrain, Predictor=xtrain[,s])
  model2<-glm(Outcome~Predictor,data=yy2,family=binomial(link='logit'))
  new2<-data.frame(Predictor=xtest[,s])
  p<-predict(model2,new2,type = "response")
  new4<-data.frame(Outcome=ytest)

```

```

pr <- prediction(p, new4)
prf <- performance(pr, measure = "tpr", x.measure = "fpr")
auc <- performance(pr, measure = "auc")
auc <- auc@y.values[[1]]
return(auc)
}

singlePlusfun <- function(xtrain, ytrain,xtest,ytest,s) {

yy2<-data.frame(Outcome=ytrain, Predictor=xtrain[,s])
model2<-glm(Outcome~Predictor,data=yy2,family=binomial(link='logit'))
new2<-data.frame(Predictor=xtest[,s])
p<-predict(model2,new2,type = "response")
new4<-data.frame(Outcome=ytest)
pr <- prediction(p, new4)
Acc <- performance(pr, measure="acc")
AccV<-Acc@y.values[[1]][max(which(Acc@x.values[[1]] >= 0.5))]
Sens <- performance(pr, measure= "sens")
SensV<-Sens@y.values[[1]][max(which(Sens@x.values[[1]] >= 0.5))]
Spec <- performance(pr, measure= "spec")
SpecV<-Spec@y.values[[1]][max(which(Spec@x.values[[1]] >= 0.5))]
Prec <- performance(pr, measure= "prec")
PrecV<-Prec@y.values[[1]][max(which(Prec@x.values[[1]] >= 0.5))]
AllV<-data.frame(Vector=c(AccV, SensV, SpecV, PrecV))
return(AllV)
}

singleROCfun <- function(xtrain, ytrain,xtest,ytest,s) {

yy2<-data.frame(Outcome=ytrain, Predictor=xtrain[,s])
model2<-glm(Outcome~Predictor,data=yy2,family=binomial(link='logit'))
new2<-data.frame(Predictor=xtest[,s])
p<-predict(model2,new2,type = "response")
new4<-data.frame(Outcome=ytest)
pr <- prediction(p, new4)
prf <- performance(pr, measure = "tpr", x.measure = "fpr")
resultU2<-prf
tomeany<-as.data.frame(prf@y.values)
tomeanx<-as.data.frame(prf@x.values)
auc <- performance(pr, measure = "auc")
auc <- auc@y.values[[1]]
return(resultU2)
}

set.seed(132)

```

```

#### Load AML Data
setwd("/Users/j.williams/AnimeshReview/LauraPaper/Journal of Translational Medicine /LauraFinal/Sept18_18")
All2 <- readRDS("All2.AML.rds"); savee <- readRDS("savee.AML.rds")

#TRAIN

#### set n to 10 for now to make quicker
n<-100 #Number of LASSO and EN loops. Per loop a model with features selected. The 80% most popular features

#N and nn control the number of models created for combinatorial analysis to help in further feature selection
N <-10
nn <-25

ErrorsFinEN<-vector(mode="double", length=n)
BetasFinEN<-vector(mode="character", length=n)
LambdaFinEN<-vector(mode="double", length=n)
BNumFinEN<-vector(mode="double", length=n)
see2EN<-data.frame(All="All")
LauCoef1<-data.frame(Coeff="See",stringsAsFactors=FALSE)
BetasTodo<-data.frame(Features="Name",Coefficients=1)

ListError<-vector(mode="double", length=n)
BetasFin<-vector(mode="character", length=n)
LambdaFin<-vector(mode="double", length=n)
BNumFin<-vector(mode="double", length=n)
see2<-data.frame(All="All")
LauCoef1L<-data.frame(Coeff="See",stringsAsFactors=FALSE)
BetasTodoL<-data.frame(Features="Name",Coefficients=1)

##### End Block 1

##### Begin Block 2

for (i in 1:n){

  smp_size = floor(0.75 * nrow(All2))

  train_ind <- caret::createDataPartition(All2$Label, p = 0.75, list = FALSE, times = 1)

  train = All2[train_ind, ]

  #Test set
  test = All2[-train_ind, ]

  #Creates matrices for independent and dependent variables.
  xtrain <- train[ , !(names(train) %in% "Label")] %>% as.matrix()
  ytrain = train$Label
  xtest <- test[ , !(names(test) %in% "Label")] %>% as.matrix()

```

```

ytest = test$Label

#Choose lambda value that minimize missclassification error.
#0.5 as elastic nets, all variables with EN are based on ElasticNets analysis. 100 lambdas sampled wi
CVEN=cv.glmnet(xtrain,ytrain,family="binomial",type.measure="class",alpha=0.5,nlambda=100)
attach(CVEN)
Lambda.BestEN<-CVEN$lambda.min #can be either minimum or 1 standard deviation
print(Lambda.BestEN)

CVFinEN=glmnet(xtrain,ytrain,family="binomial",alpha=0.5,lambda=Lambda.BestEN)
CoefEN<-coef(CVFinEN) #Beta coefficients obtained from here
InterceptEN<-CoefEN@x[1]
BetasEN<-CVFinEN$beta
Betas2EN<-data.frame(Features=BetasEN@Dimnames[[1]][BetasEN@i+1], Coefficients=BetasEN@x) #Beta coeff
CVPred1EN = predict(CVFinEN, family="binomial", s=Lambda.BestEN, newx = xtest,type="class") #predict

#Calculate error for categorical values
ytest2<-as.factor(ytest)
ResultsEN<-table(CVPred1EN,ytest)
confusionMatrix(as.factor(CVPred1EN),ytest)
AccuracyEN<-(ResultsEN[1]+ResultsEN[4])/sum(ResultsEN[1:4])
ErrorEN<-1-AccuracyEN

LauCoef<-Betas2EN$Coefficients
LauCoefEN<-data.frame(Coeff=LauCoef,stringsAsFactors=FALSE)
LauCoef1<-rbind(LauCoef1,LauCoefEN)
BetasTodo<-rbind(BetasTodo,Betas2EN) #store coefficients and store betas

seeEN<-Betas2EN$Features
seeEN1<-data.frame(All=seeEN)
see2EN<-rbind(see2EN,seeEN1) #all beta names stored

mEN<-count(see2EN, All) #frequency of the betas stored counted
see3EN<-toString(seeEN)
ErrorsFinEN[i]<-ErrorEN #error of the model stored
BetasFinEN[i]<-see3EN #name of features the model used
BNumFinEN[i]<-length(seeEN) #number of features the model used
LambdaFinEN[i]<-Lambda.BestEN #lambda chosen for model
detach(CVEN)

#Change between Lasso and EN, alpha=1 (*)
CV=cv.glmnet(xtrain,ytrain,family="binomial",type.measure="class",alpha=1,nlambda=100)

attach(CV)

Lambda.Best<-CV$lambda.min
CVFin=glmnet(xtrain,ytrain,family="binomial",alpha=1,lambda=Lambda.Best)
Coef<-coef(CVFin)
Intercept<-Coef@x[1]
Betas<-CVFin$beta
Betas2<-data.frame(Features=Betas@Dimnames[[1]][Betas@i+1], Coefficients=Betas@x)

```

```

CVPred1 = predict(CVFin, family="binomial", s=Lambda.Best, newx = xtest,type="class")

#Calculate error for categorical values
ytest2<-as.factor(ytest)
confusionMatrix(as.factor(CVPred1),ytest)
Results<-table(CVPred1,ytest)
Accuracy<-(Results[1]+Results[4])/sum(Results[1:4])
Error<-1-Accuracy

#visual display of for

BetasTodoL<-rbind(BetasTodoL,Betas2)
see<-Betas2$Features
see1<-data.frame(All=see)
see2<-rbind(see2,see1)
m<-count(see2, All)

see3<-toString(see)
ListError[i]<-Error
BetasFin[i]<-see3
BNumFin[i]<-length(see)
LambdaFin[i]<-Lambda.Best
detach(CV)
}

```

```

## [1] 0.01410672
## [1] 0.06136322
## [1] 0.0572892
## [1] 0.02276051
## [1] 0.0768437
## [1] 0.01208532
## [1] 0.09287787
## [1] 0.08556725
## [1] 0.06002755
## [1] 0.0477804
## [1] 0.04394421
## [1] 0.09268814
## [1] 0.06570016
## [1] 0.03319311
## [1] 0.05911919
## [1] 0.02889832
## [1] 0.08646156
## [1] 0.008838517
## [1] 0.05092736
## [1] 0.01965162
## [1] 0.0620856
## [1] 0.09770617
## [1] 0.09408764
## [1] 0.07763139
## [1] 0.08480714
## [1] 0.0689899
## [1] 0.07218094

```

## [1] 0.07332494  
## [1] 0.0751107  
## [1] 0.05546047  
## [1] 0.03706898  
## [1] 0.01768615  
## [1] 0.07290411  
## [1] 0.02436325  
## [1] 0.1010492  
## [1] 0.07947772  
## [1] 0.08638957  
## [1] 0.06704386  
## [1] 0.005414587  
## [1] 0.07849055  
## [1] 0.06146099  
## [1] 0.03060099  
## [1] 0.01808845  
## [1] 0.09695372  
## [1] 0.08502742  
## [1] 0.06793977  
## [1] 0.08769333  
## [1] 0.06770055  
## [1] 0.07696627  
## [1] 0.02821053  
## [1] 0.01849147  
## [1] 0.08380528  
## [1] 0.07297679  
## [1] 0.006236947  
## [1] 0.03218741  
## [1] 0.100343  
## [1] 0.05928835  
## [1] 0.0692829  
## [1] 0.06440835  
## [1] 0.05934364  
## [1] 0.08362592  
## [1] 0.0537196  
## [1] 0.009768704  
## [1] 0.08008044  
## [1] 0.02443207  
## [1] 0.07740715  
## [1] 0.01072579  
## [1] 0.1275876  
## [1] 0.0206432  
## [1] 0.1033139  
## [1] 0.005817232  
## [1] 0.09127219  
## [1] 0.0771582  
## [1] 0.07655367  
## [1] 0.009287085  
## [1] 0.07404753  
## [1] 0.037219  
## [1] 0.01361882  
## [1] 0.06059189  
## [1] 0.01232926  
## [1] 0.01386188

```
## [1] 0.09655957
## [1] 0.05262116
## [1] 0.00697718
## [1] 0.05080445
## [1] 0.05765488
## [1] 0.0942935
## [1] 0.02991813
## [1] 0.08112793
## [1] 0.0526637
## [1] 0.07080803
## [1] 0.0766287
## [1] 0.06940108
## [1] 0.08790559
## [1] 0.07147071
## [1] 0.009480638
## [1] 0.1038332
## [1] 0.01677133
## [1] 0.1024412
## [1] 0.02911092
```

```
#Visualizing data from LASSO and EN ####
```

```
#obtain in a data frame all error, betas names, number and lamda for the N models for each lasso and EN
```

```
All_info<-data.frame(Error=ListError, BetasNames=BetasFin, BetasNum=BNumFin, Lambda=LambdaFin)
```

```
All_infoEN<-data.frame(Error=ErrorsFinEN, BetasNames=BetasFinEN, BetasNum=BNumFinEN, Lambda=LambdaFinEN)
```

```
m<-m[-1,]
```

```
mEN<-mEN[-1,]
```

```
Final_LASSO<-m[order(-m$n),] #order highest frequencies above and filter with those that appear more th
```

```
Final_LASSO1<-filter(Final_LASSO,n>40) #threshold selected - 80%
```

```
Final_EN<-mEN[order(-mEN$n),]
```

```
Final_EN1<-filter(Final_EN,n>40)
```

```
Final_Plot_Names<-filter(Final_EN,n>40)
```

```
outputVenn2<-venn(list(EN= Final_EN$All, LASSO = Final_LASSO$All))
```

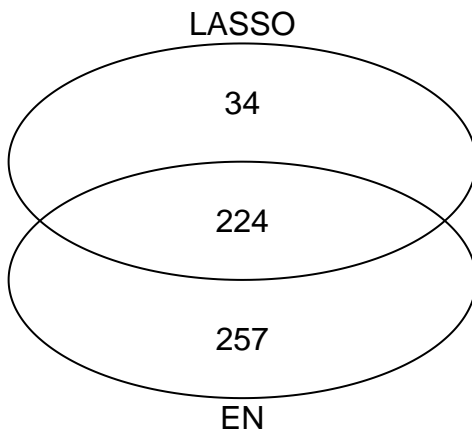

```
outputVenn<-venn(list(EN= Final_EN1$All, LASSO = Final_LASSO1$All))
```

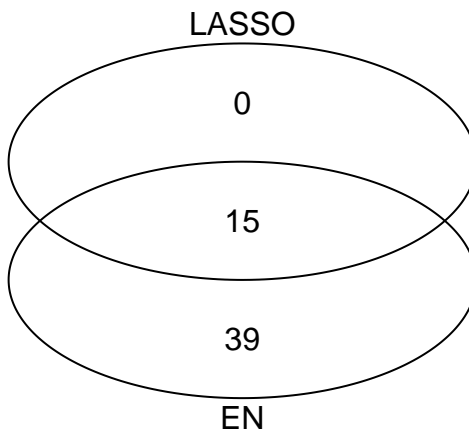

```
Freqs<-m[order(-m$n),]  
num<-length(Freqs$All)
```

```
Freqs$All <- factor(Freqs$All, levels = Freqs$All[order(-Freqs$n)]) #plot in a bar graph the frequencies  
ggplot(Freqs, aes(All, n))+geom_bar(stat="identity")+theme(axis.text.x = element_text(size=8, angle=90))
```

## LASSO features

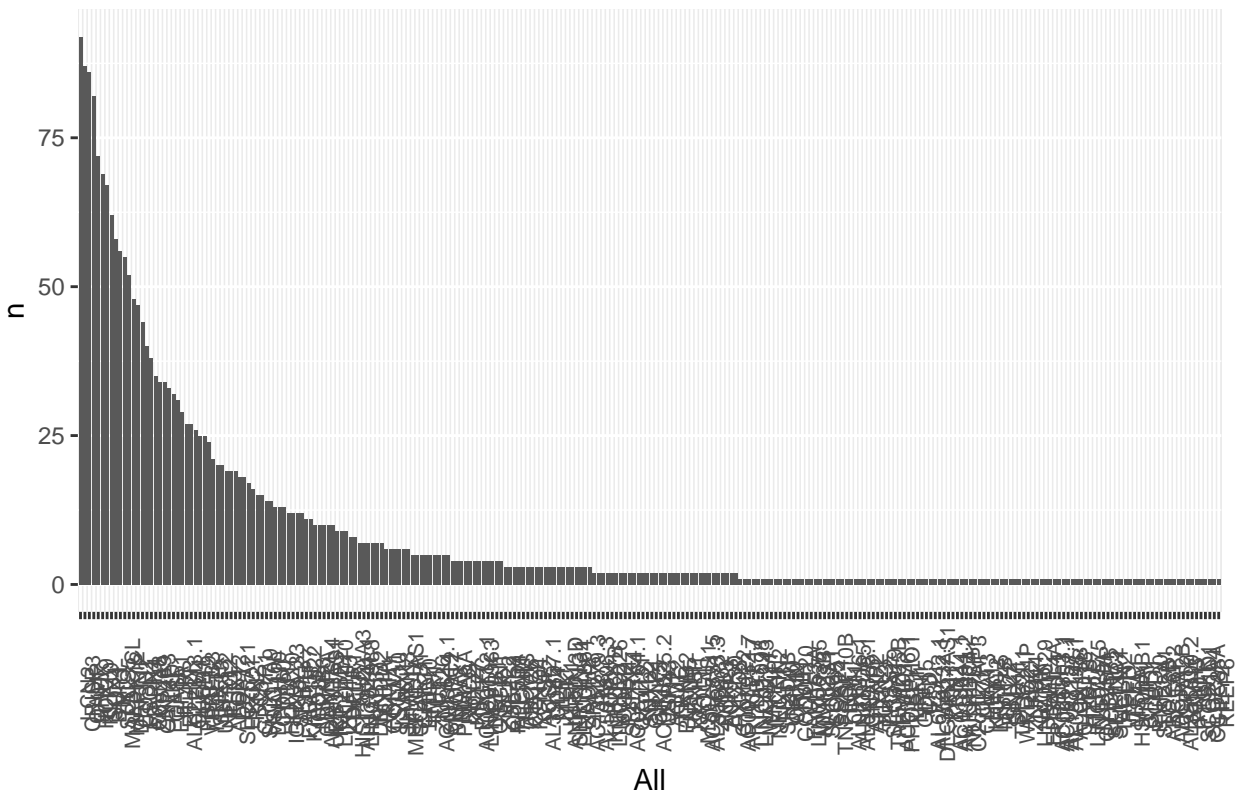

```
FreqsEN<-mEN[order(-mEN$n),]
numEN<-length(FreqsEN$All)
```

```
FreqsEN$All <- factor(FreqsEN$All, levels = FreqsEN$All[order(-FreqsEN$n)])
ggplot(FreqsEN, aes(All, n))+geom_bar(stat="identity")+theme(axis.text.x = element_text(size=8, angle=90))
```

## EN features

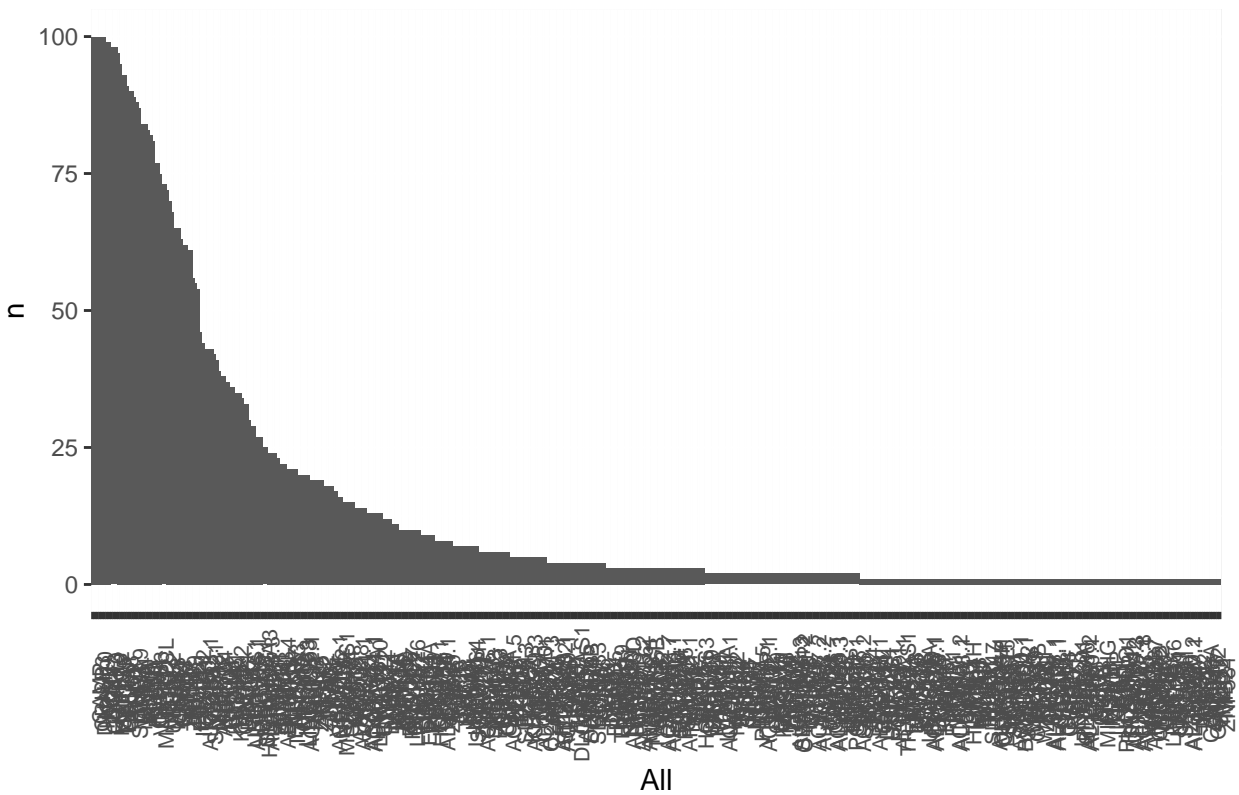

*#plot of how many times each feature appears. Most important will appear in all models = N.*

*#Boxplot with Betas and its coefficients*

```
Boxplot1<-BetasTodo[BetasTodo$Features %in% Final_EN1$All,] #see which features appear in the filtered .
ggplot(Boxplot1,aes(Boxplot1$Features,Boxplot1$Coefficients))+geom_boxplot()+geom_jitter()
```

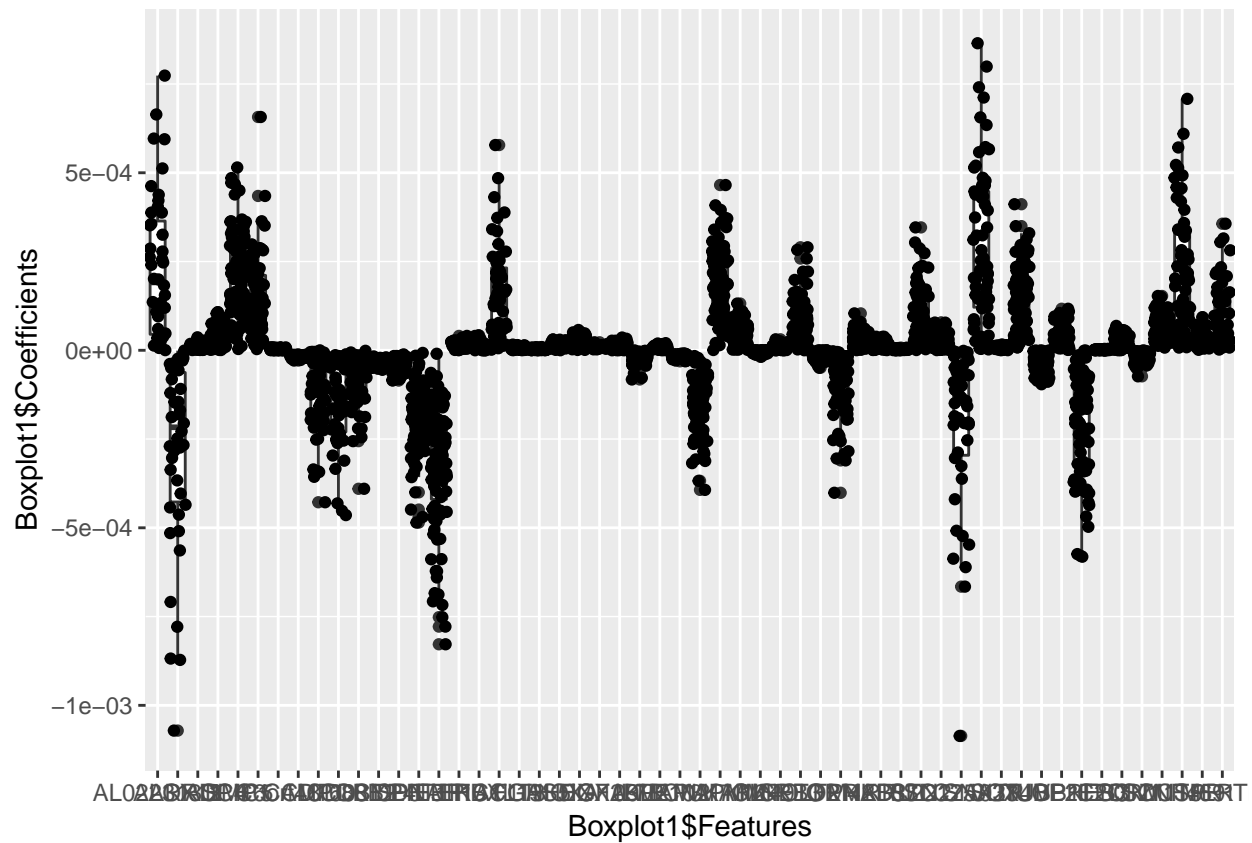

```
Boxplot1["Method"]<-as.factor("EN")
```

```
Boxplot2<-BetasTodoL[BetasTodoL$Features %in% Final_LASSO1$All,]
```

```
ggplot(Boxplot2,aes(Boxplot2$Features,Boxplot2$Coefficients))+geom_boxplot()+geom_jitter()
```

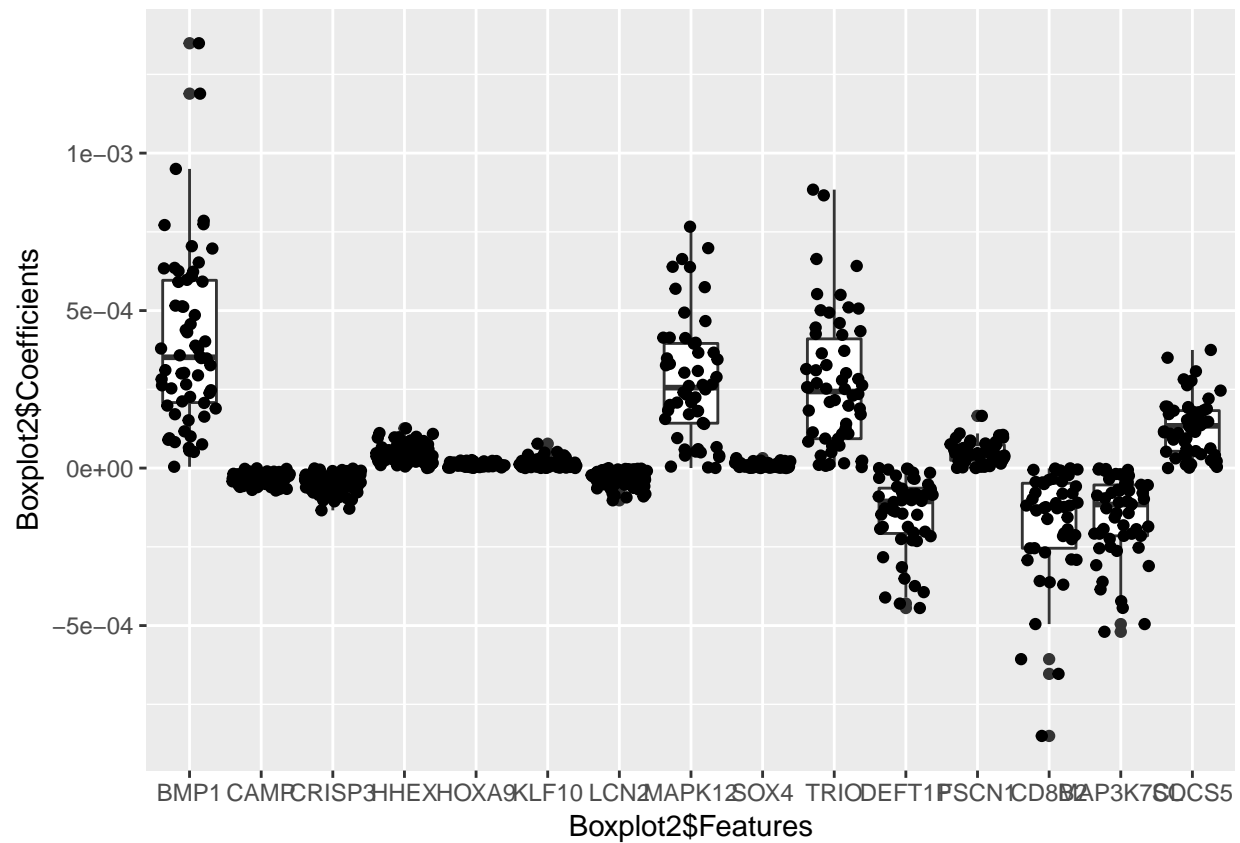

```
Boxplot2["Method"]<-as.factor("LASSO")
```

```
Fin_Boxplot<-rbind(Boxplot1,Boxplot2) #Unite both boxplots LASSO and EN
```

```
ggplot(Fin_Boxplot,aes(Fin_Boxplot$Features,Fin_Boxplot$Coefficients))+geom_boxplot(aes(color=Method))+
```

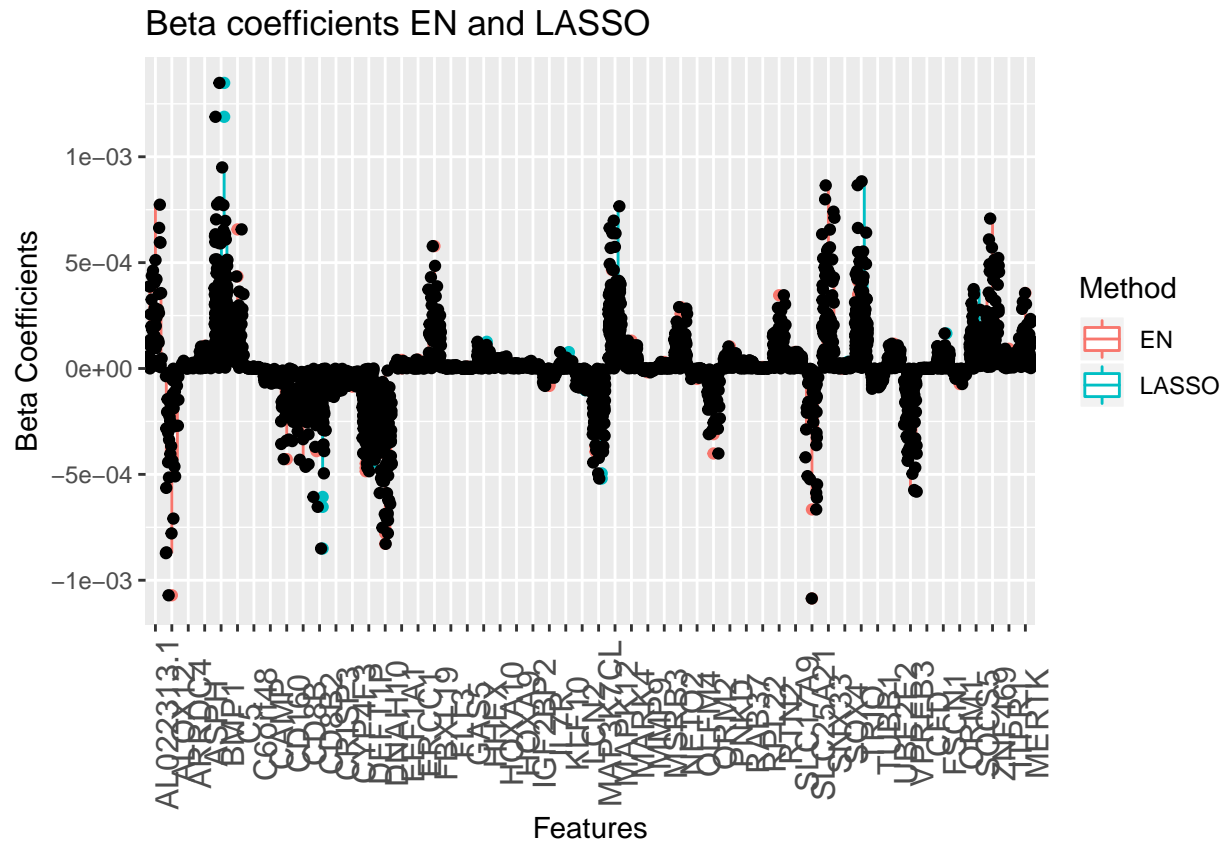

```
All_Feat<-rbind(Final_LASSO1,Final_EN1)
All_Feat2<-unique(All_Feat$All) #select the filtered betas in both.
#All_Feat2<-data.frame(All_Feat2)
Betas_select<-All12[,colnames(All12[,intersect(gsub("`", "", All_Feat2), colnames(All12))])]
Betas_select["Label"]<-All12$Label
Betas_select<-data.frame(Betas_select)

#Beta_select are the final features selected.

##### End Block 2

##### Begin Block 3

###Combinatorial analysis ###
NumVar<-length(Betas_select)
maxCombF<-data.frame(Name=toString("Trial"),AUC=0)
auc3max<-0
cont<-0
cont2<-0

for (p in 1:N){ #N different measurements of AUC values, mean done at the end.
  smp_size<-floor(0.65 * nrow(Betas_select))
  train_ind <- caret::createDataPartition(All12$Label, p = 0.65, list = FALSE, times = 1)

  # Training set
  train<-Betas_select[train_ind, ]
```

```

# Test set
test<-Betas_select[-train_ind, ]

xtrain <- train[ , !(names(train) %in% "Label")] %>% as.matrix()

xtest <- test[ , !(names(test) %in% "Label")] %>% as.matrix()

ytrain<-train$Label
ytest<-test$Label

xtest<-data.frame(xtest)
xtrain<-data.frame(xtrain)

y<-Betas_select[,NumVar]
X<-Betas_select[,1:(NumVar-1)]

levels(ytrain)[1]<-"0"
levels(ytrain)[2]<-"1"
levels(ytest)[1]<-"0"
levels(ytest)[2]<-"1"

for (k in 1:nn){
  columns<-c(1:dim(xtrain)[2])
  columns<-sample(columns)
  d<-xtrain[,columns]
  for (i in 1:dim(xtrain)[2]){
    for (j in 1:dim(xtrain)[2]){
      yy3<-data.frame(Outcome=ytrain,d[i:j])
      model3<-glm(Outcome~.,data=yy3, family=binomial(link='logit'))
      dd<-xtest[,columns]
      new3<-data.frame(dd[i:j])
      p3<-predict(model3,new3,type="response")
      new5<-data.frame(Outcome=ytest)
      pr3 <- prediction(p3, new5)
      prf3 <- performance(pr3, measure = "tpr", x.measure = "fpr")
      auc3 <- performance(pr3, measure = "auc")
      auc3 <- auc3@y.values[[1]]
      result2<-auc3
      if (auc3>auc3max){
        if (i>j){
          maxComb<-data.frame(Name=toString(names(d)[j:i]),AUC=auc3)
          auc3max<-auc3
          cont<-cont+1
        }
        else{
          maxComb<-data.frame(Name=toString(names(d)[i:j]),AUC=auc3)
          auc3max<-auc3
          cont<-cont+1
        }
      }
    }
  }
}

```

```

        else{
          cont2<-cont2+1
        }
      }
    }
  }
  maxCombF<-rbind(maxCombF,maxComb)
  auc3max<-0
}

maxCombF2<-maxCombF[order(maxCombF$AUC),]
names<-maxCombF2$Name[dim(maxCombF2)[1]]
names1<-as.character(names)
names1<-strsplit(names1," ")
names<-as.data.frame(names1)

Betas_select2<-A112[,colnames(A112[,intersect(gsub("`", "", names[,1]), colnames(A112))])]
Betas_select2["Label"]<-savee
Betas_select2<-as.data.frame(Betas_select2)

#### End Block 3

```

```

#### Begin Block 4

```

*#Random mix between variables and AUC value obtained through GLM model, rough approximation of future p*  
*#Betas\_select2, final features selected.*

```

NumVar<-length(Betas_select2)

```

*N<-1000 #number of models produced (both permuted (random) and real) - for all univariate (Each featur*  
*#Real program runs with 1000 - Takes 12 hours.*

```

multipleAUC<-matrix(rnorm(2),1,N)
multipleAUCR<-matrix(rnorm(2),1,N)
multipleAUCNB<-matrix(rnorm(2),1,N)
multipleAUCNBR<-matrix(rnorm(2),1,N)

multipleROC<-matrix(as.list(rnorm(2)),1,N)
multipleROCR<-matrix(as.list(rnorm(2)),1,N)
multipleNBROC<-matrix(as.list(rnorm(2)),1,N)
multipleNBROCR<-matrix(as.list(rnorm(2)),1,N)

singleROC<-list()
doubleROC<-list()
singleROCR<-list()
doubleROCR<-list()

doublePlus<-list()
singlePlus<-list()

```

```

singleAUC<-matrix(rnorm(2),NumVar-1,N)
doubleAUC<-matrix(rnorm(2),(NumVar-1),N)
singleAUCR<-matrix(rnorm(2),NumVar-1,N)
doubleAUCR<-matrix(rnorm(2),(NumVar-1),N)

doubleAUCSVMR<-matrix(rnorm(2),(NumVar-1),N)
doubleAUCSVM<-matrix(rnorm(2),(NumVar-1),N)
doubleAUCSVMCrossR<-matrix(rnorm(2),(NumVar-1),N)
doubleAUCSVMCross<-matrix(rnorm(2),(NumVar-1),N)
doubleAUCRFCross<-matrix(rnorm(2),(NumVar-1),N)
doubleAUCRFCrossR<-matrix(rnorm(2),(NumVar-1),N)
doubleAUCNBR<-matrix(rnorm(2),(NumVar-1),N)
doubleAUCNB<-matrix(rnorm(2),(NumVar-1),N)

MatsingleROC<-matrix(as.list(rnorm(2)),NumVar-1,N)
MatsingleROCR<-matrix(as.list(rnorm(2)),NumVar-1,N)
MatdoubleROC<-matrix(as.list(rnorm(2)),(NumVar-1),N)
MatdoubleROCR<-matrix(as.list(rnorm(2)),(NumVar-1),N)

MatsinglePlus<-matrix(as.list(rnorm(2)),NumVar-1,N)
MatdoublePlus<-matrix(as.list(rnorm(2)),(NumVar-1),N)
MatsinglePlusR<-matrix(as.list(rnorm(2)),NumVar-1,N)
MatdoublePlusR<-matrix(as.list(rnorm(2)),(NumVar-1),N)
##### End Block 4

```

```
##### Begin Block 5
```

```

for (j in 1:N){ #N different measurements of AUC values, mean done at the end.
  smp_size<-floor(0.65 * nrow(Betas_select2))
  #set.seed(907)
  train_ind <- caret::createDataPartition(All2$Label, p = 0.65, list = FALSE, times = 1)

  # Training set
  train<-Betas_select2[train_ind, ]

  # Test set
  test<-Betas_select2[-train_ind, ]

  xtrain <- train[ , !(names(train) %in% "Label")] %>% as.matrix()

  xtest <- test[ , !(names(test) %in% "Label")] %>% as.matrix()

  ytrain<-train$Label
  ytest<-test$Label

  xtest<-data.frame(xtest)
  xtrain<-data.frame(xtrain)

  y<-Betas_select2[,NumVar]
  X<-Betas_select2[,1:(NumVar-1)]

```

```

levels(ytrain)[1]<-"0"
levels(ytrain)[2]<-"1"
levels(ytest)[1]<-"0"
levels(ytest)[2]<-"1"

## multiple, good
multipleAUCNB[1,j]<-multipleAUCfunNB(xtrain, ytrain,xtest,ytest)
multipleAUC[1,j]<-multipleAUCfun(xtrain, ytrain,xtest,ytest)

multipleNBROC[[j]]<-multipleROCfunNB(xtrain, ytrain,xtest,ytest)
multipleROC[[j]]<-multipleROCfun(xtrain, ytrain,xtest,ytest)

#separate

## single, should be good
for (s in (1:(NumVar-1))){
  s<-as.numeric(s)
  singleAUC[s,j]<-singleAUCfun(xtrain, ytrain,xtest,ytest,s)
  singleROC[[s]]<-singleROCfun(xtrain, ytrain,xtest,ytest,s)
  MatsinglePlus[s,j]<-singlePlusfun(xtrain, ytrain,xtest,ytest,s)
}
MatsingleROC[,j]<-matrix(singleROC)

#Null Hypothesis ####

# Training set

train$Label<-sample(train$Label)
test$Label<-sample(test$Label)
#Permuted data, will make sure that are models are really valid as randomizing the label should yield

# Test set

xtrain <- train[ , !(names(train) %in% "Label")] %>% as.matrix()

xtest <- test[ , !(names(test) %in% "Label")] %>% as.matrix()

ytrain<-train$Label
ytest<-test$Label

xtest<-data.frame(xtest)
xtrain<-data.frame(xtrain)

```

```

y<-Betas_select2[,NumVar]
X<-Betas_select2[,1:(NumVar-1)]

levels(ytrain)[1]<-"0"
levels(ytrain)[2]<-"1"
levels(ytest)[1]<-"0"
levels(ytest)[2]<-"1"

multipleAUCNBR[1,j]<-multipleAUCfunNB(xtrain, ytrain,xtest,ytest)
multipleAUCR[1,j]<-multipleAUCfun(xtrain, ytrain,xtest,ytest)

multipleNBROCR[[j]]<-multipleROCfunNB(xtrain, ytrain,xtest,ytest)
multipleROCR[[j]]<-multipleROCfun(xtrain, ytrain,xtest,ytest)

for (s in (1:(NumVar-1))){
  s<-as.numeric(s)
  singleAUCR[s,j]<-singleAUCfun(xtrain, ytrain,xtest,ytest,s)
  singleROCR[[s]]<-singleROCfun(xtrain, ytrain,xtest,ytest,s)
  MatsinglePlusR[s,j]<-singlePlusfun(xtrain, ytrain,xtest,ytest,s)
}
MatsingleROCR[,j]<-matrix(singleROCR)

#
}

##### End Block 5

##### Begin Block 6

names2<-sapply(1:(NumVar-1), function(i){paste0("NISS/",names(xtrain)[i])})

trial<-NULL

h=1
for (b in (2:NumVar-1)) {
  print(b)
  trial[b]<-names2[h]
  h=h+1
}

## [1] 1
## [1] 2
## [1] 3
## [1] 4
## [1] 5
## [1] 6
## [1] 7

```

```
## [1] 8
```

```
singleAUC<-as.data.frame(singleAUC)
singleAUC<-mutate(singleAUC, Means=rowMeans(singleAUC))
row.names(singleAUC)<-names(xtrain)
```

```
singleAUCR<-as.data.frame(singleAUCR)
singleAUCR<-mutate(singleAUCR, Means=rowMeans(singleAUCR))
row.names(singleAUCR)<-names(xtrain)
```

```
multipleAUCNBR<-as.data.frame(multipleAUCNBR)
multipleAUCNBR["Means"]<-rowMeans(multipleAUCNBR)
multipleAUCR<-as.data.frame(multipleAUCR)
multipleAUCR["Means"]<-rowMeans(as.data.frame(multipleAUCR))
```

```
multipleAUCNB<-as.data.frame(multipleAUCNB)
multipleAUCNB["Means"]<-rowMeans(as.data.frame(multipleAUCNB))
multipleAUC<-as.data.frame(multipleAUC)
multipleAUC["Means"]<-rowMeans(as.data.frame(multipleAUC))
```

```
Final<-data.frame(MultiNB=t(multipleAUCNB),MultiNBRand=t(multipleAUCNBR),Multi=t(multipleAUC),MultiRand=
FinalMeans<-data.frame(MultiNB=multipleAUCNB$Means,MultiNBRand=multipleAUCNBR$Means,Multi=multipleAUC$M
```

```
#sacar ROC CURVES #####
```

```
print("here")
```

```
## [1] "here"
```

```
for (g in 1:(NumVar-1)){

  plot(MatsingleROC[[g,1]],lwd=3,main=paste("ROC curve of", names(xtrain)[g]))
  for (b in 1:N){

    plot(MatsingleROCR[[g,b]],col=b,lty=3,add=TRUE)
  }
}
```

**ROC curve of DEFT1P**

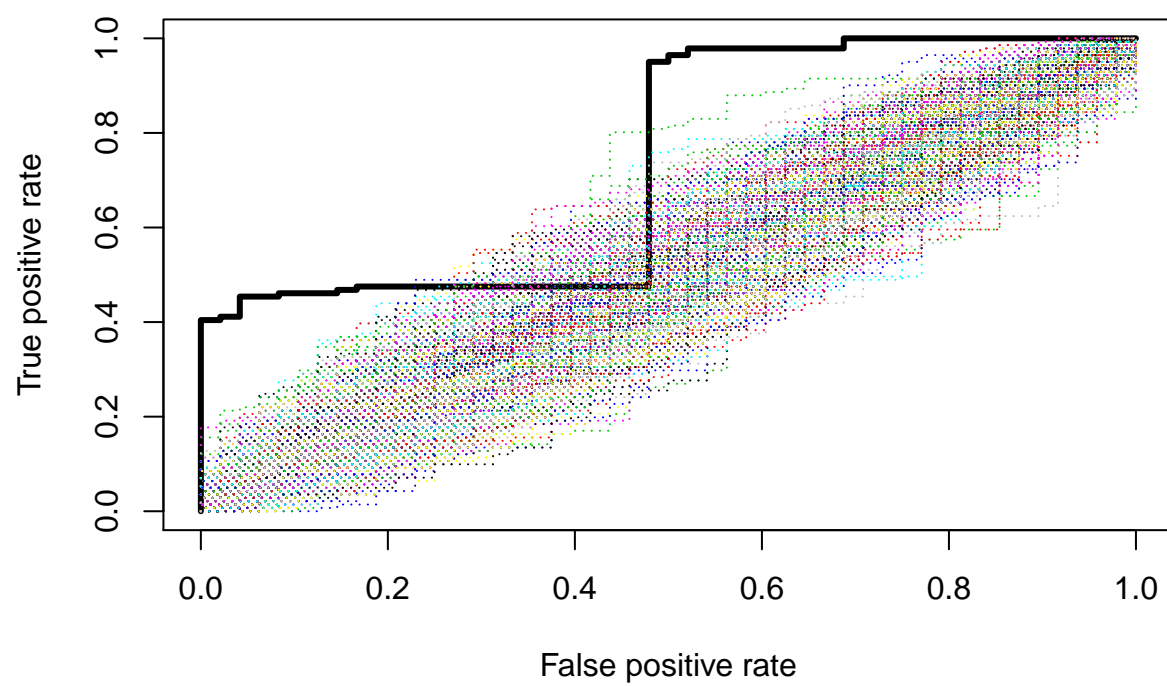

ROC curve of MSRB3

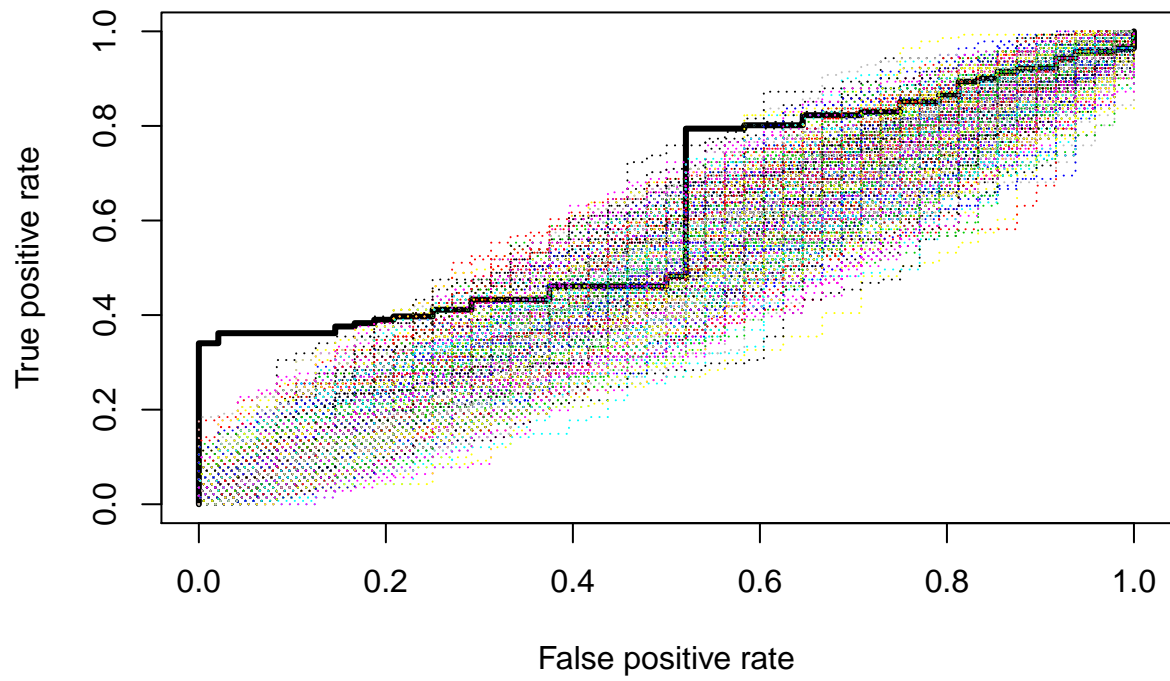

ROC curve of ORM1

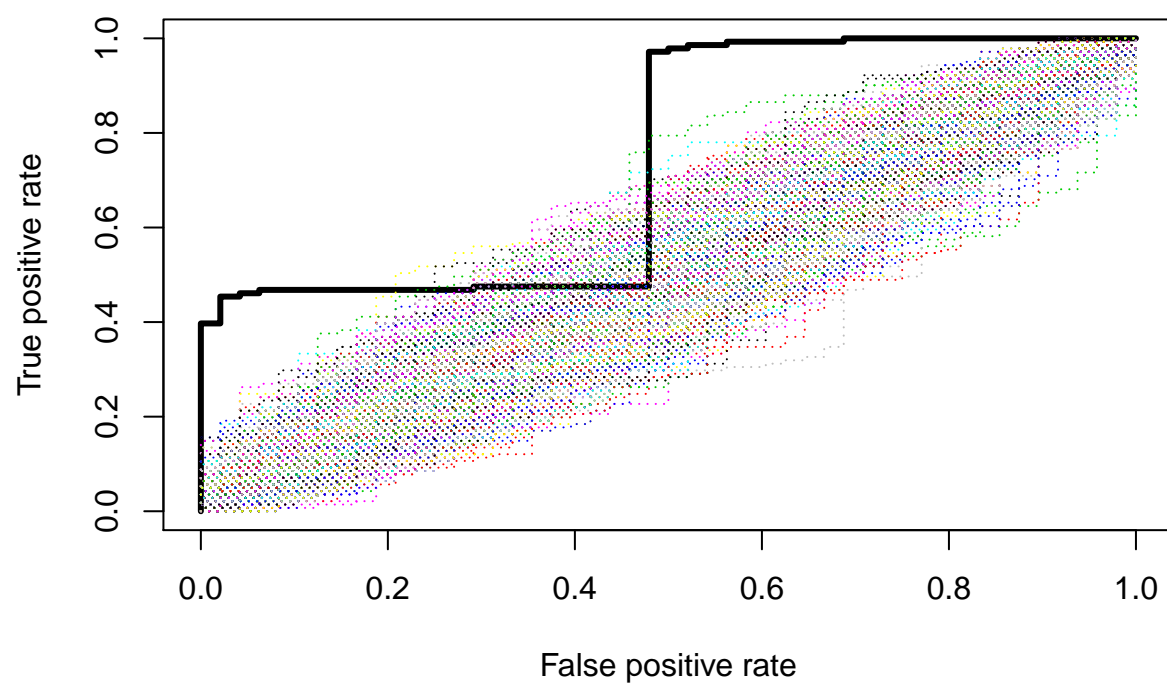

ROC curve of HHEX

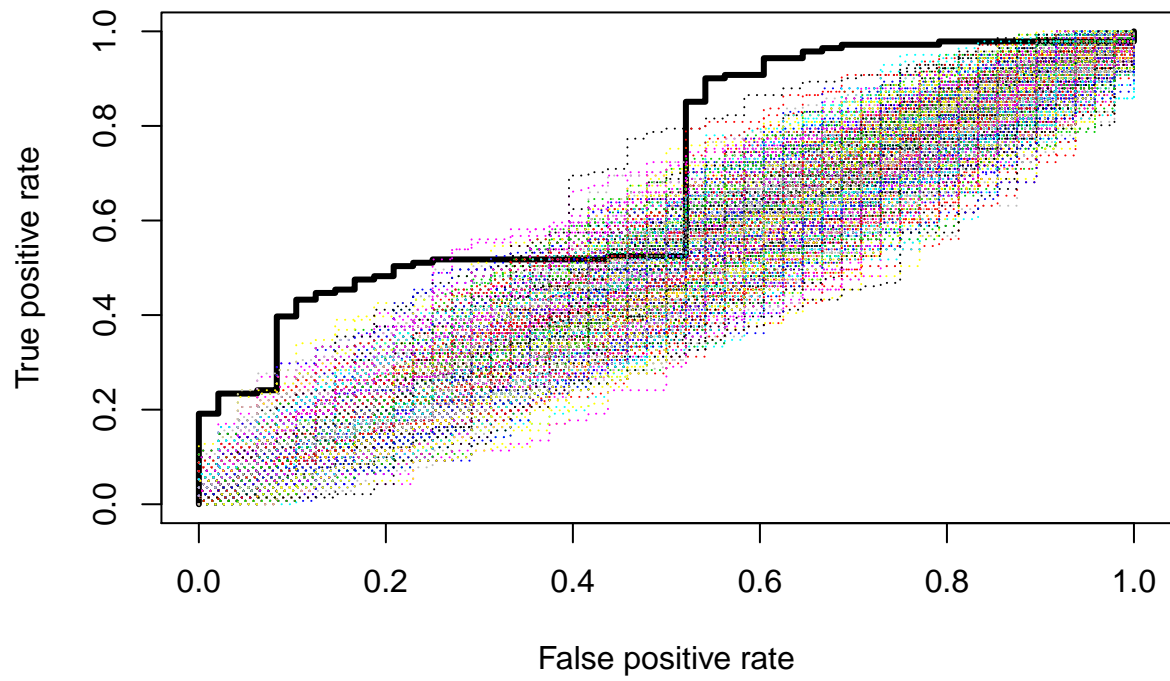

**ROC curve of AL022313.1**

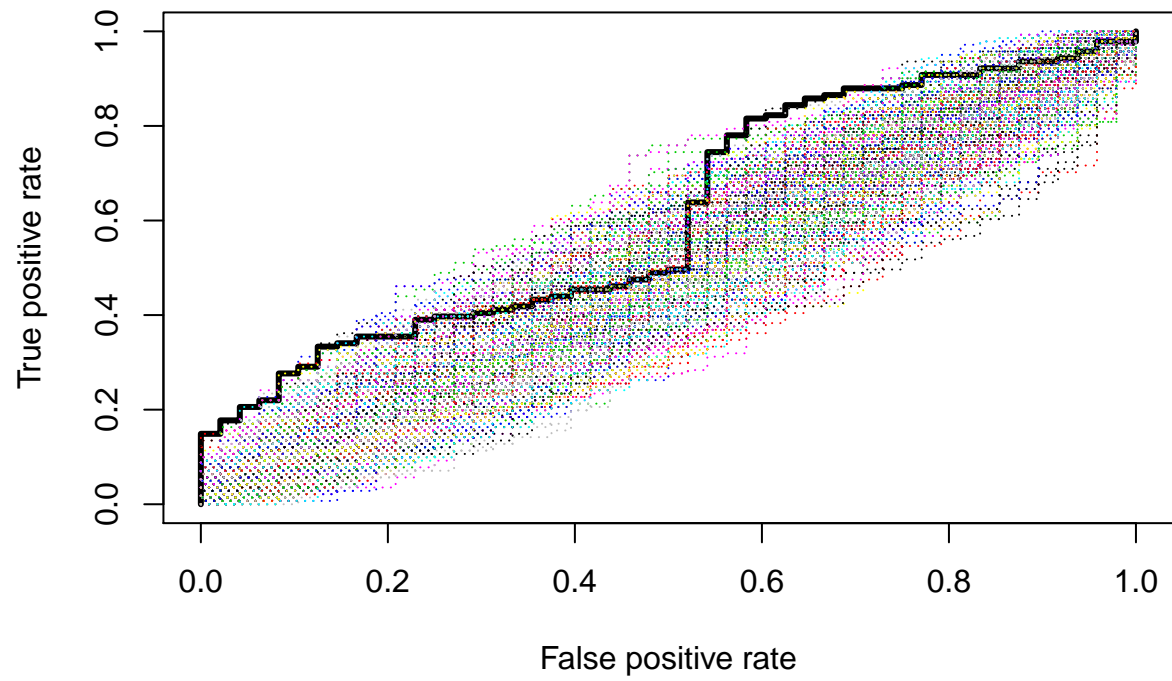

ROC curve of ARRDC4

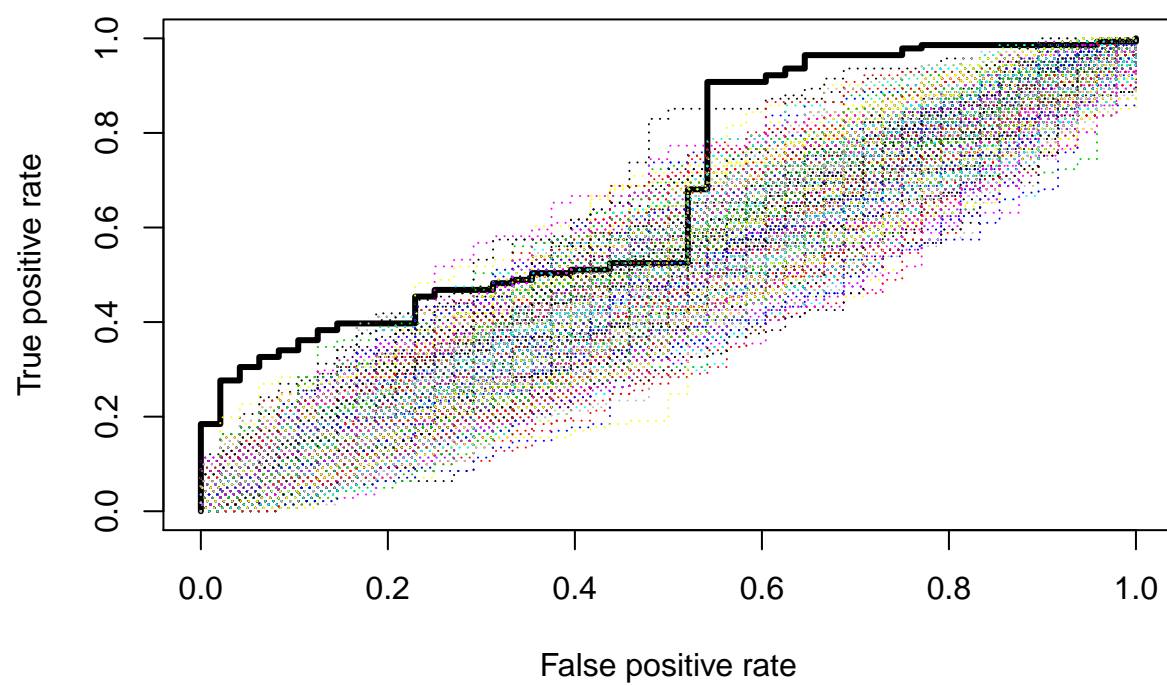

ROC curve of MERTK

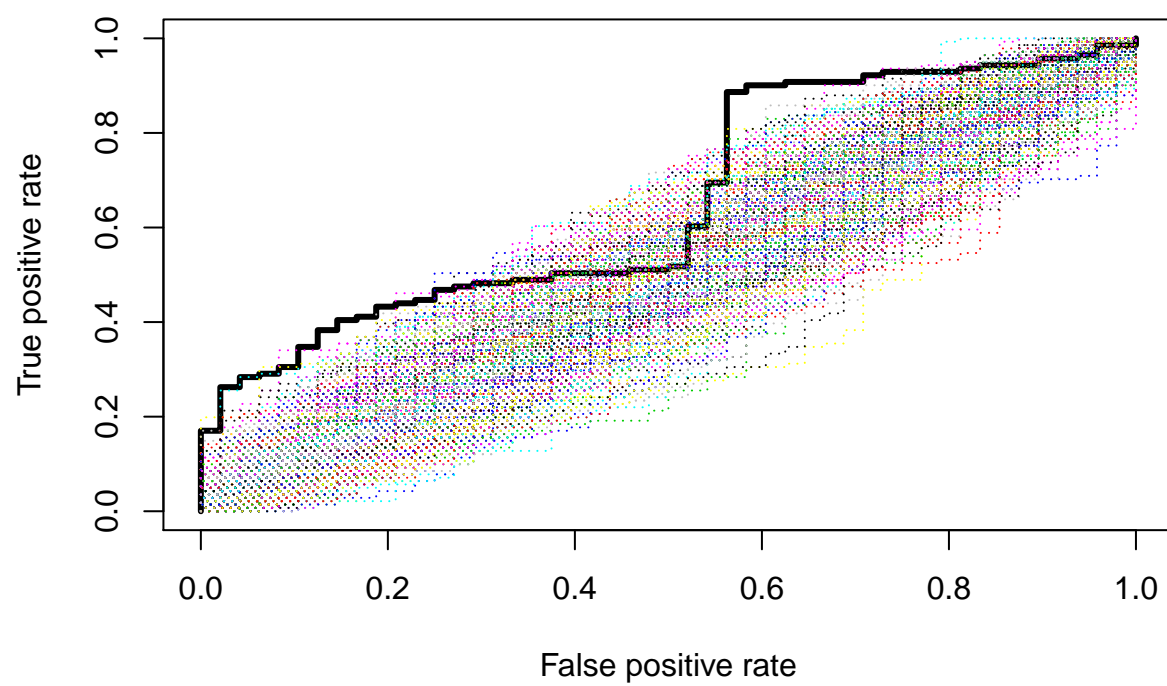

## ROC curve of RTN2

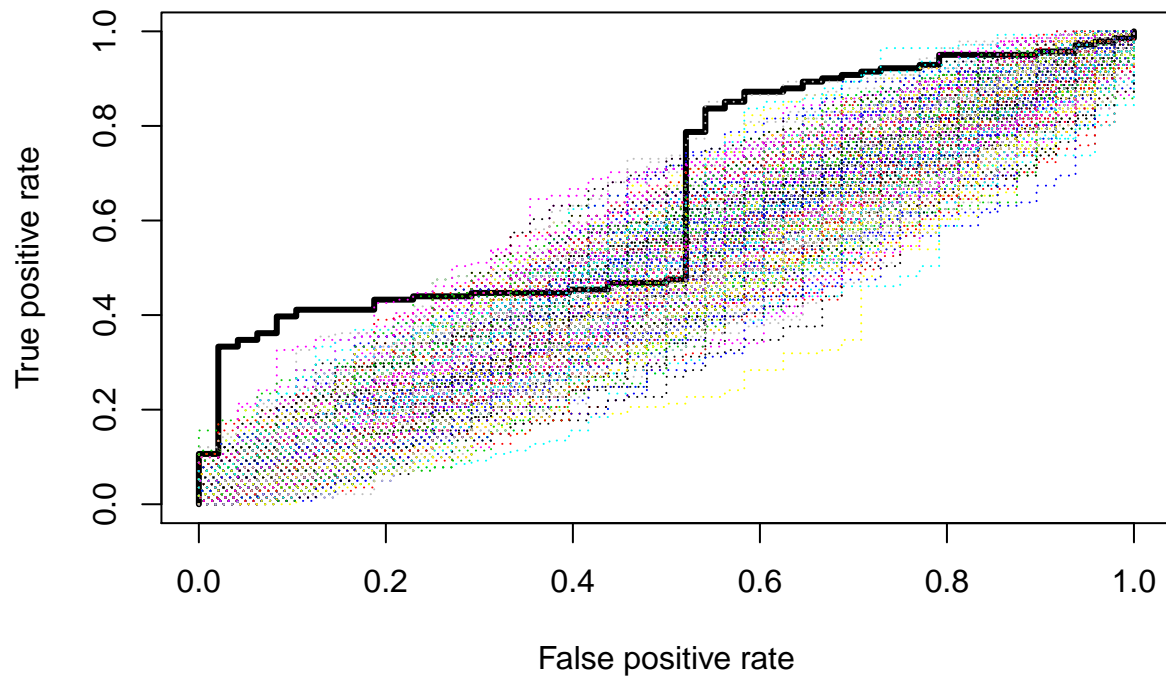

```
plot(multipleROC[[1]],lwd=3,main=paste("ROC curve of", trial[1]))
for (b in 1:N){
  plot(multipleNBROCR[[b]],col=b,lty=3,add=TRUE)
}
```

## ROC curve of NISS/DEFT1P

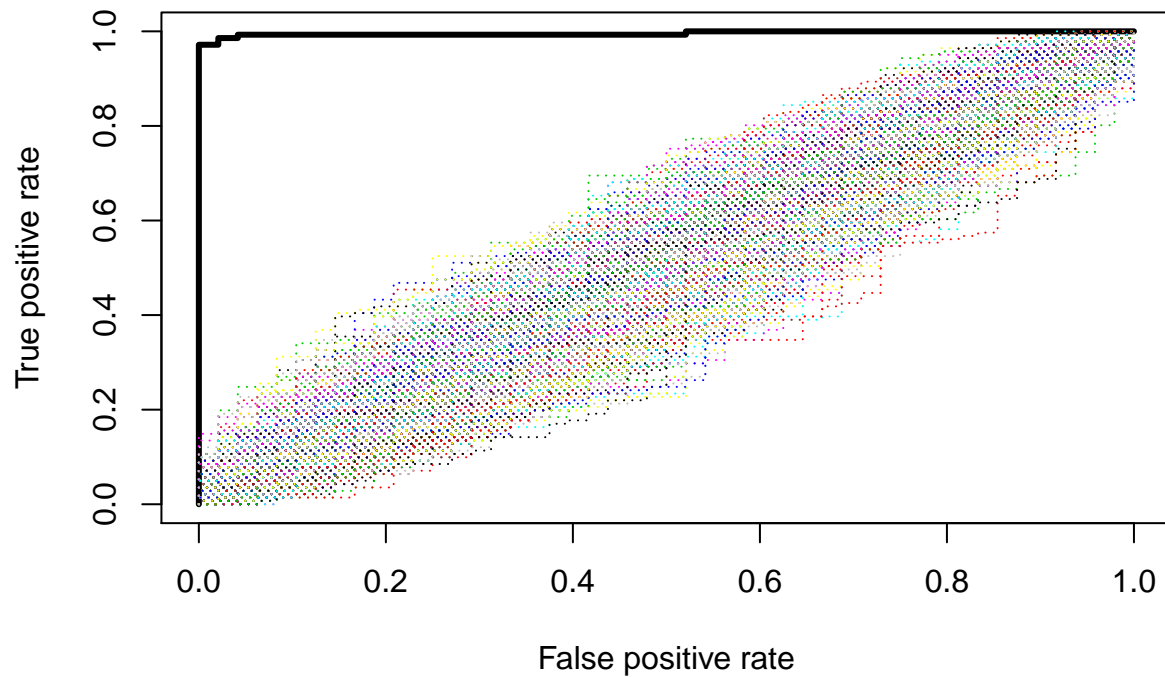

```
#
#
#

AUCT<-as.data.frame(t(singleAUC[1:dim(singleAUC)[2]-1]))
AUC2T<-as.data.frame(t(singleAUCR[1:dim(singleAUCR)[2]-1]))
one<-as.data.frame(singleAUC$Means)
two<-as.data.frame(singleAUCR$Means)
Mean<-data.frame(one,two)
Mean<-as.matrix(Mean)
#
nm<-names(AUCT)
for (j in 1:(NumVar-1)){

  Mono<-data.frame(Mono=AUCT[,j],Label=as.factor(c(rep("model",dim(AUCT)[1]))))
  Mono1<-data.frame(Mono=AUC2T[,j],Label=as.factor(c(rep("permuted data",dim(AUC2T)[1]))))
  Mono<-rbind(Mono,Mono1)
  print(ggdensity(Mono, x = "Mono", fill = "Label", palette = "jco")+geom_vline(xintercept =Mean[j,],lin
}
}
```

Permuted versus real model, density plot of AUC curve of DEFT1P

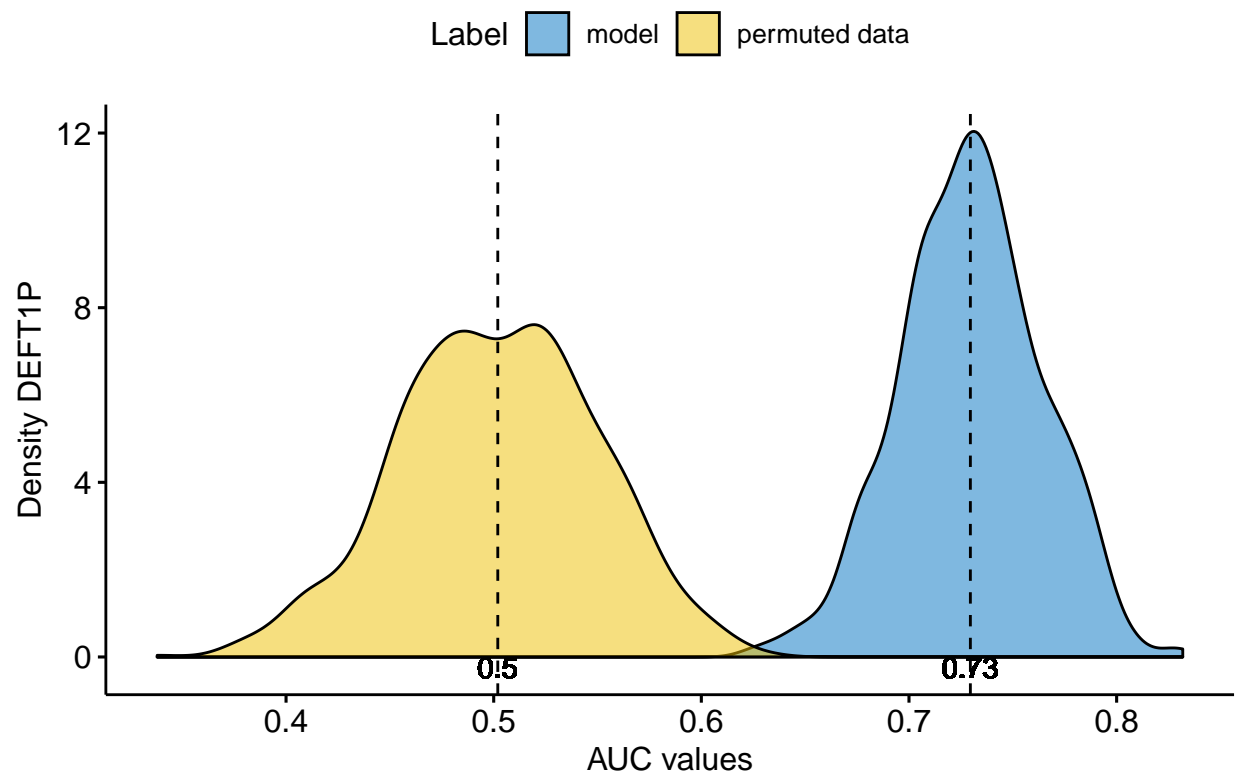

Permuted versus real model, density plot of AUC curve of MSRB3

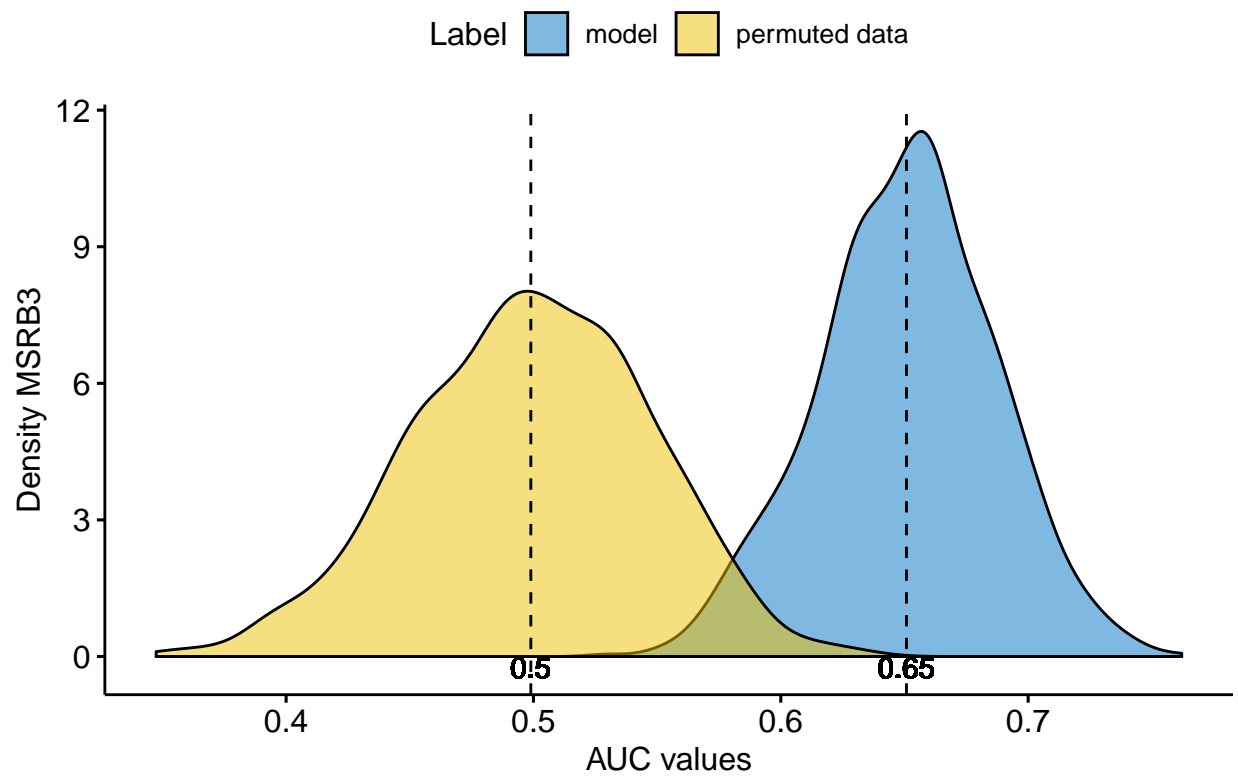

Permuted versus real model, density plot of AUC curve of ORM1

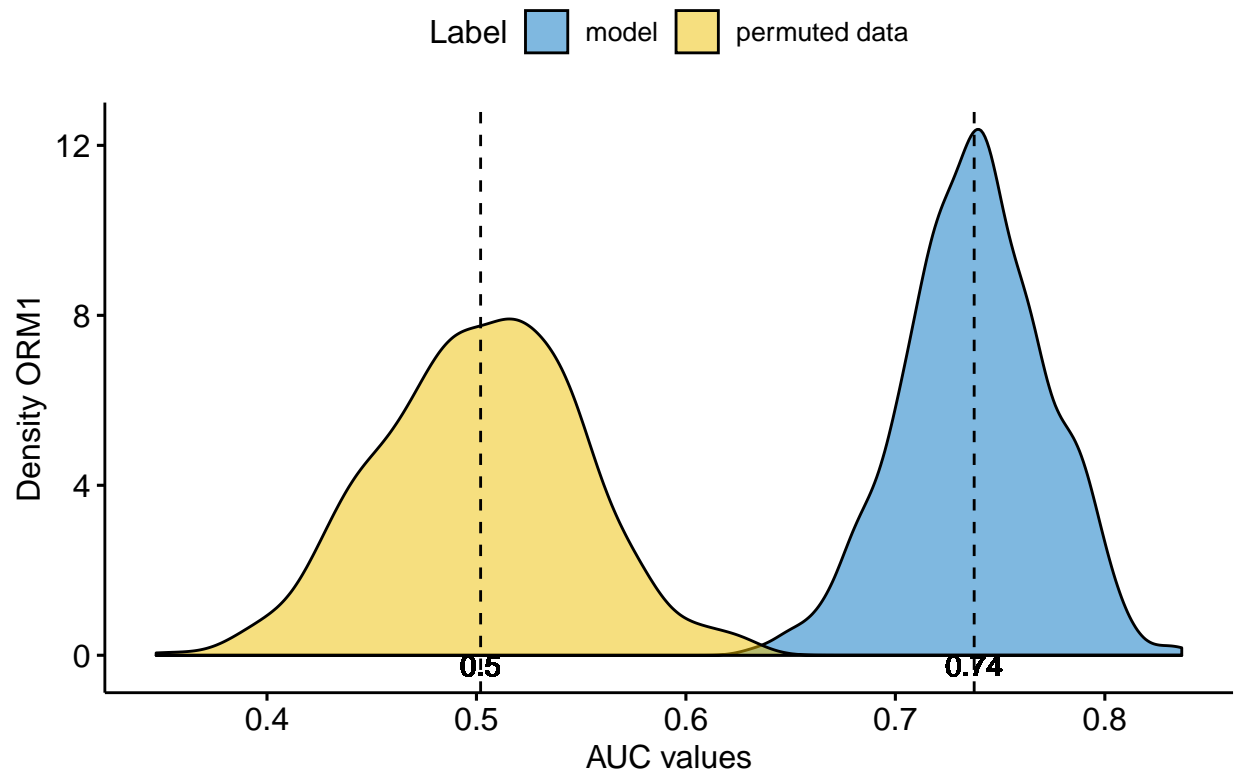

Permuted versus real model, density plot of AUC curve of HHEX

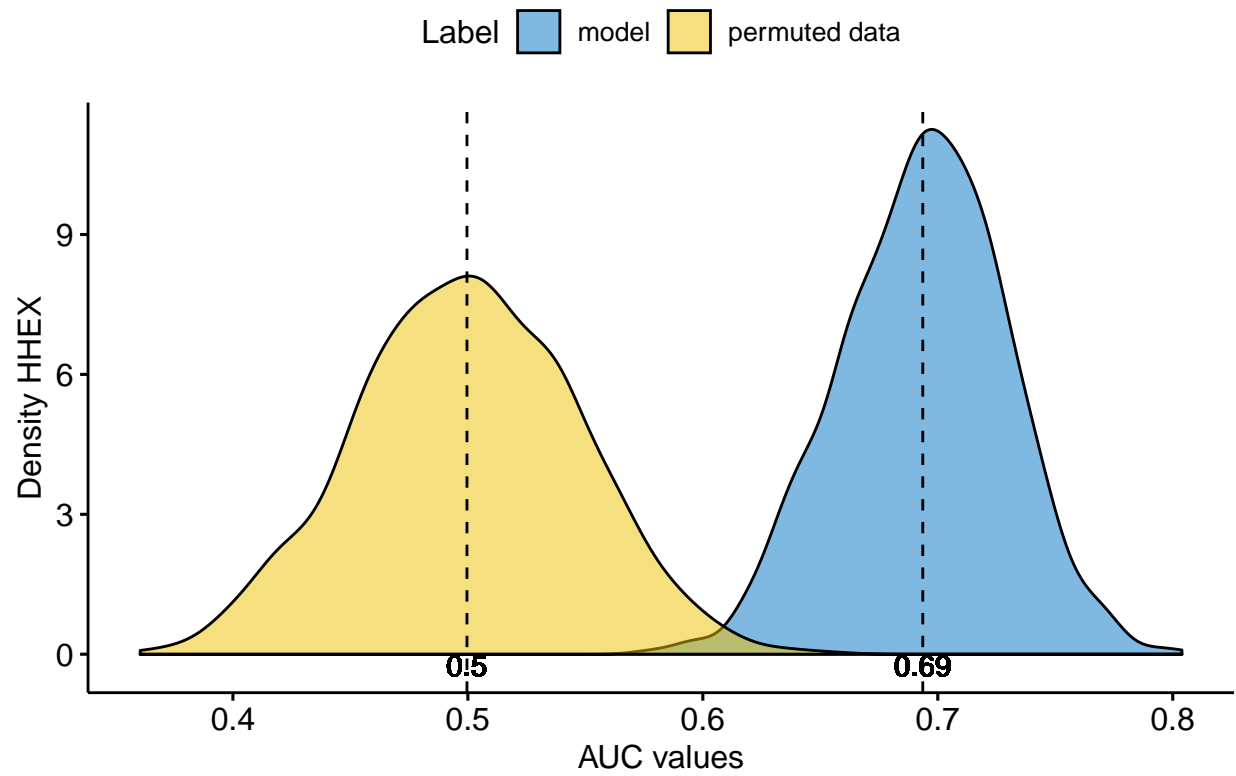

Permuted versus real model, density plot of AUC curve of AL022313

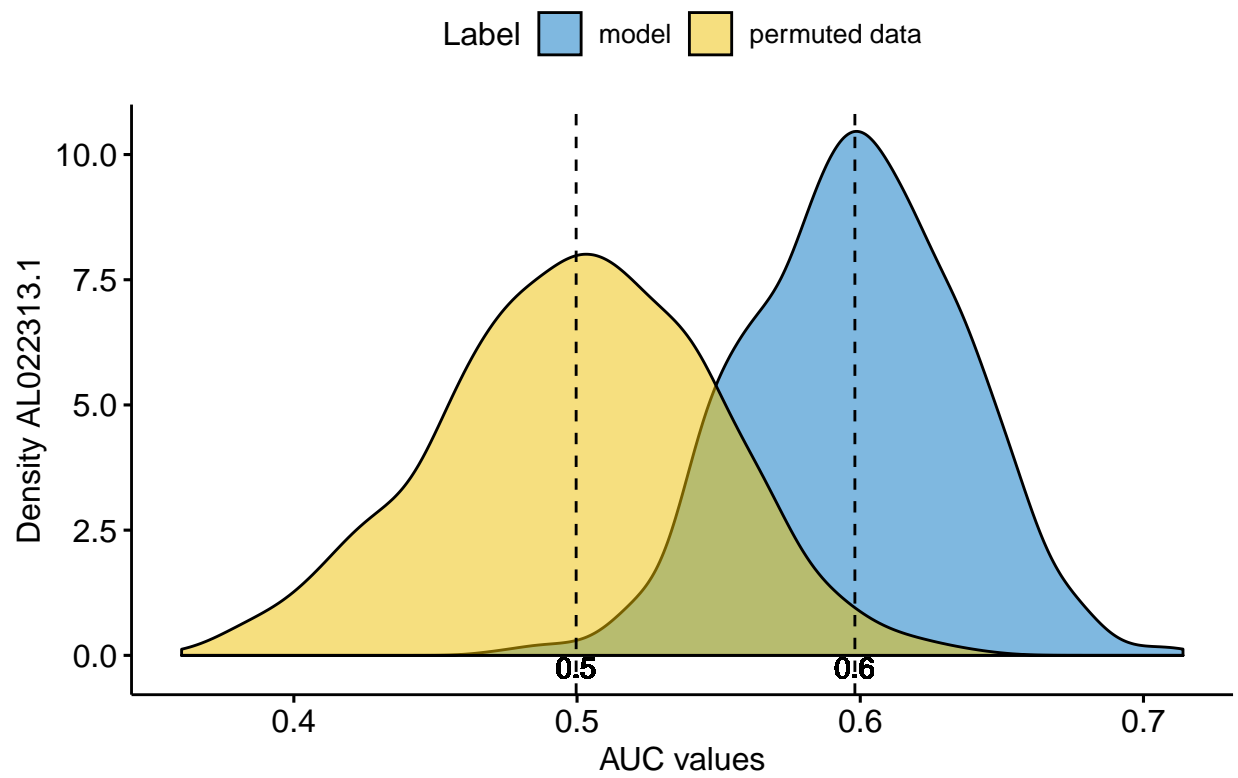

Permuted versus real model, density plot of AUC curve of ARRDC4

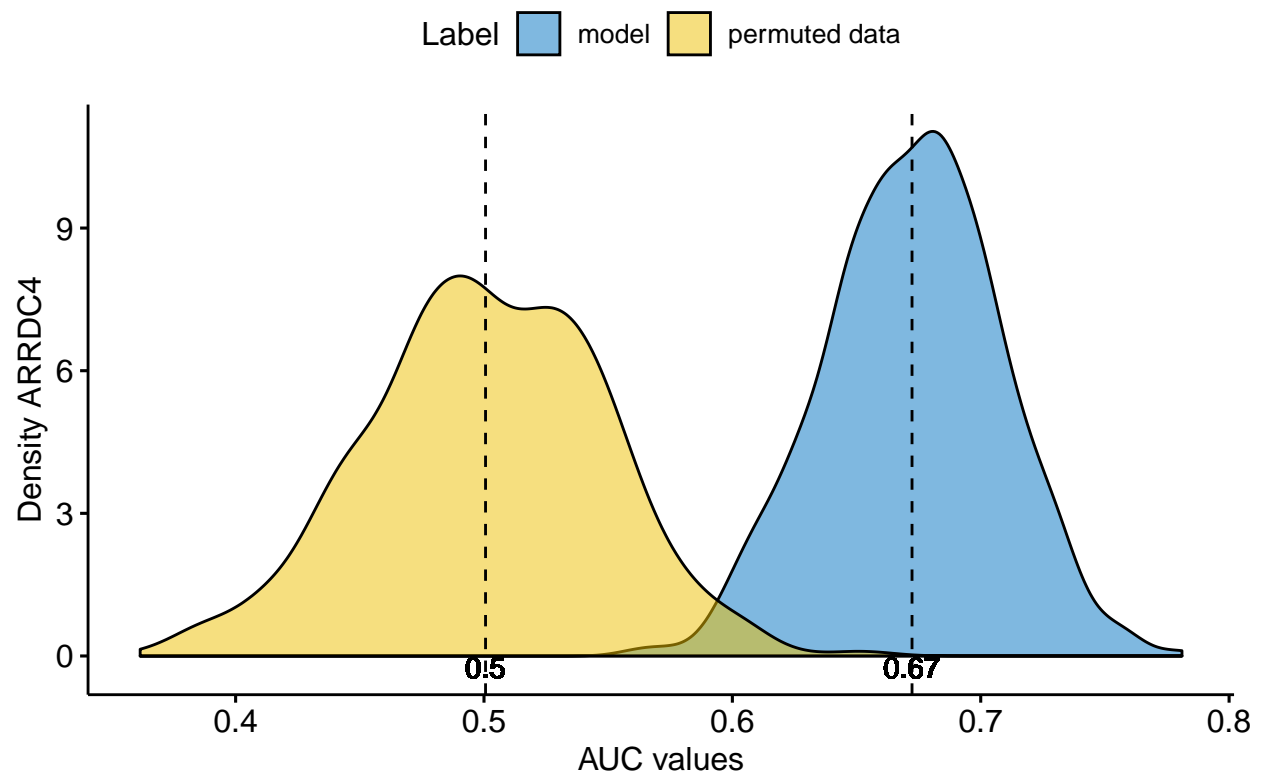

Permuted versus real model, density plot of AUC curve of MERTK

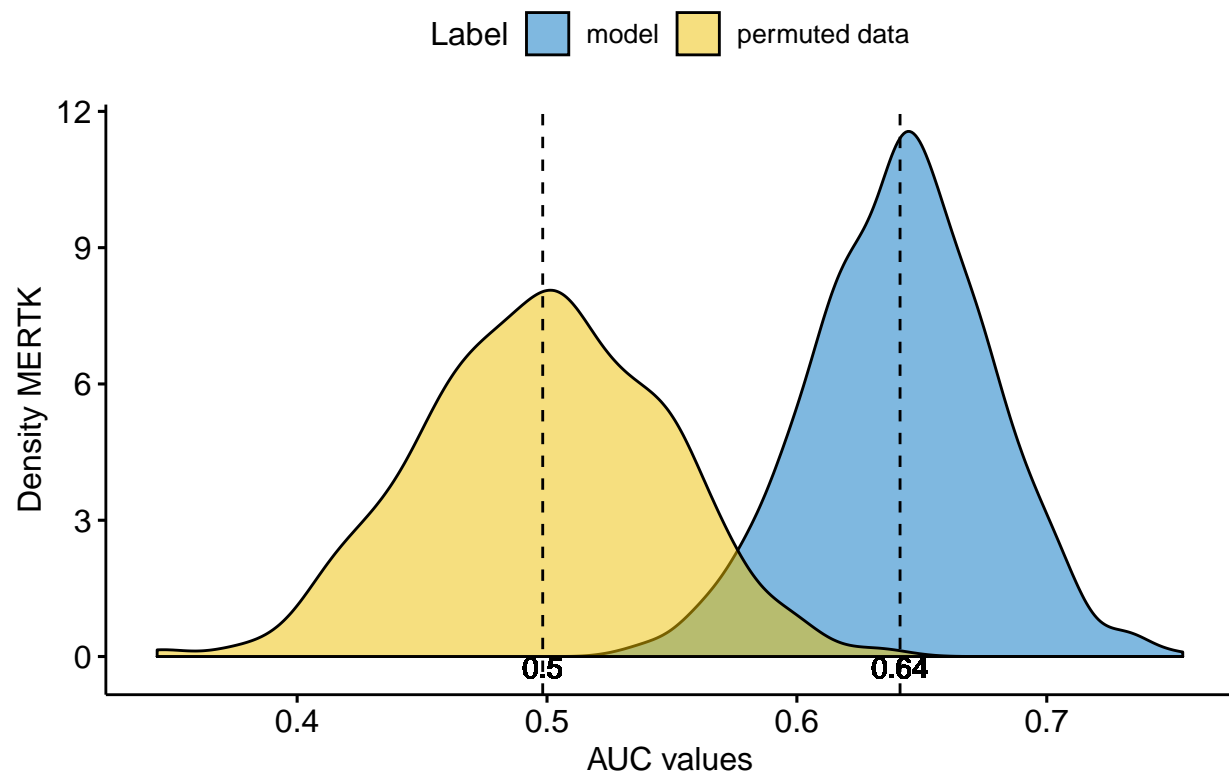

## Permuted versus real model, density plot of AUC curve of RTN2

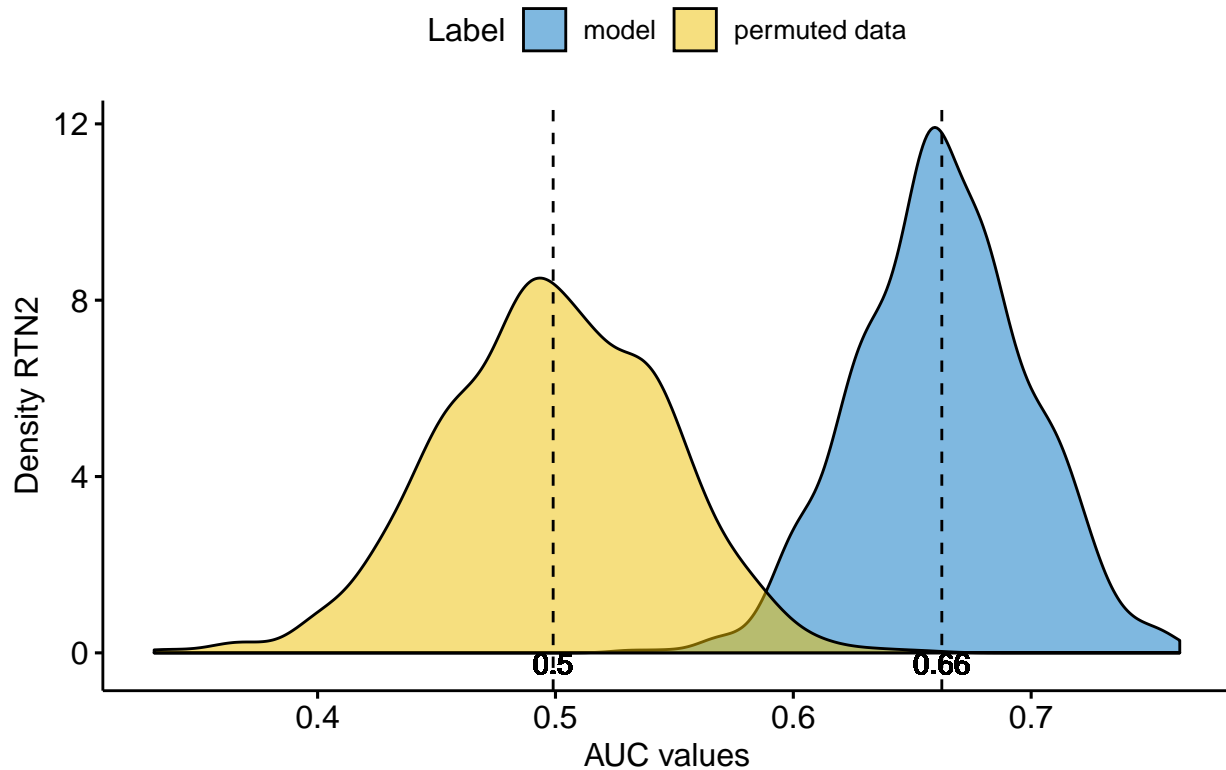

```
# #
n <- length(plot)

# ###Accuracy, Precision etc
#
plot3<-list()
plot4<-list()
Data<-c("Accuracy", "Sensitivity", "Specificity", "Precision")
##### End Block 6

##### Begin Block 7

#
#Accuracy
Mono<-NULL
MonoR<-NULL
for (s in 1:(NumVar-1)){
  for (d in 1:4){
    for (j in 1:N){
      Mono1<-data.frame(Mono=MatsinglePlus[s,j][[1]][[d]])
      Mono<-rbind(Mono, Mono1)
      Mono1R<-data.frame(MonoR=MatsinglePlusR[s,j][[1]][[d]])
      MonoR<-rbind(MonoR, Mono1R)
    }
  }
  MonoLab<-data.frame(Mono=Mono, Label=as.factor(c(rep("model", dim(Mono)[1]))))
  MonoLabR<-data.frame(Mono=MonoR, Label=as.factor(c(rep("permuted data", dim(MonoR)[1]))))
}
```

```

colnames(MonoLabR)[1]<-c("Mono")
Means<-data.frame(Mean=mean(MonoLab$Mono),MeanR=mean(MonoLabR$Mono))
Mono<-rbind(MonoLab,MonoLabR)
plot3[d]<-ggdensity(Mono, x = "Mono", fill = "Label", palette = "jco")+labs(title= paste("Value : 
Mono<-NULL
MonoR<-NULL

}
print(grid.arrange(plot3[[2]], plot3[[3]],plot3[[4]],plot3[[1]], ncol=2))
}

```

Value : Sensitivity for DEFT1P

Label ■ model ■ permuted data

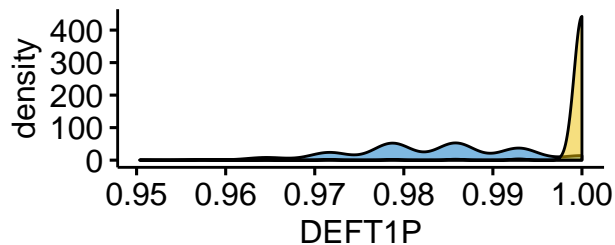

Value : Specificity for DEFT1P

Label ■ model ■ permuted data

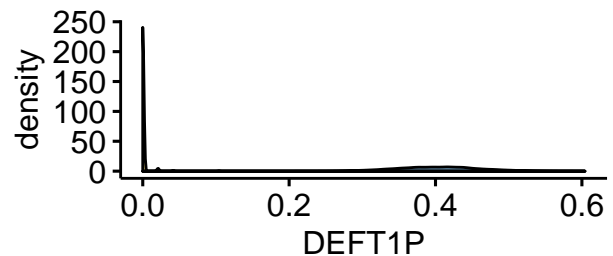

Value : Precision for DEFT1P

Label ■ model ■ permuted data

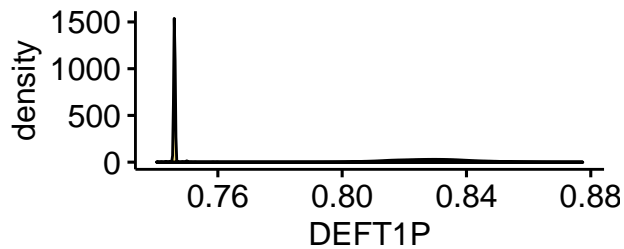

Value : Accuracy for DEFT1P

Label ■ model ■ permuted data

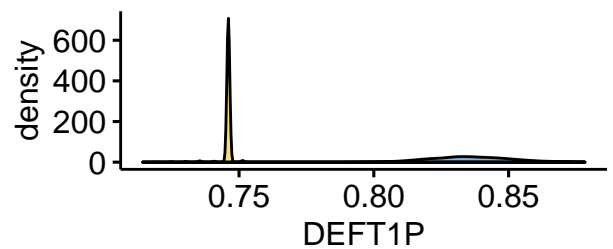

```

## TableGrob (2 x 2) "arrange": 4 grobs
##   z      cells  name      grob
## 1 1 (1-1,1-1) arrange gtable[layout]
## 2 2 (1-1,2-2) arrange gtable[layout]
## 3 3 (2-2,1-1) arrange gtable[layout]
## 4 4 (2-2,2-2) arrange gtable[layout]

```

Value : Sensitivity for MSRB3

Label ■ model ■ permuted data

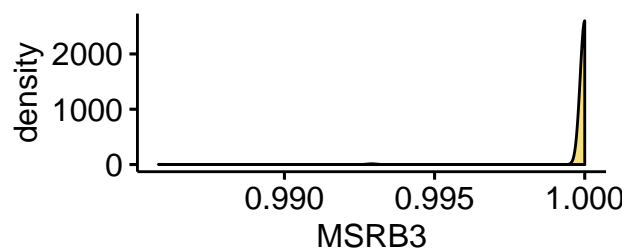

Value : Specificity for MSRB3

Label ■ model ■ permuted data

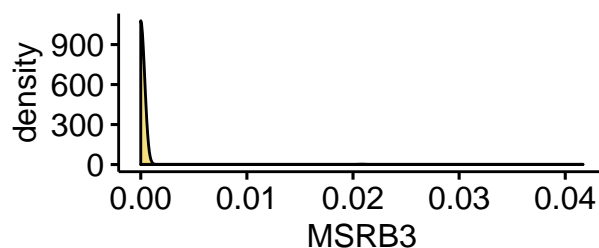

Value : Precision for MSRB3

Label ■ model ■ permuted data

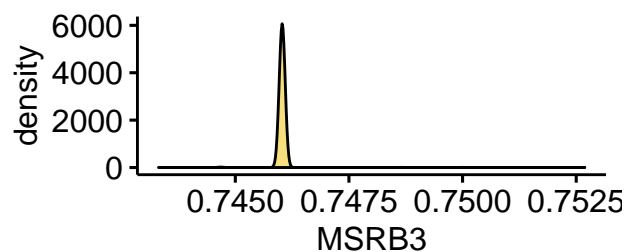

Value : Accuracy for MSRB3

Label ■ model ■ permuted data

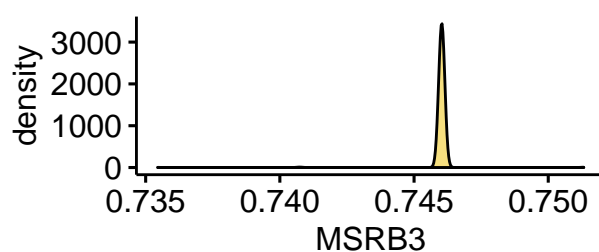

```
## TableGrob (2 x 2) "arrange": 4 grobs
##   z      cells   name      grob
## 1 1 (1-1,1-1) arrange gtable[layout]
## 2 2 (1-1,2-2) arrange gtable[layout]
## 3 3 (2-2,1-1) arrange gtable[layout]
## 4 4 (2-2,2-2) arrange gtable[layout]
```

Value : Sensitivity for ORM1

Label ■ model ■ permuted data

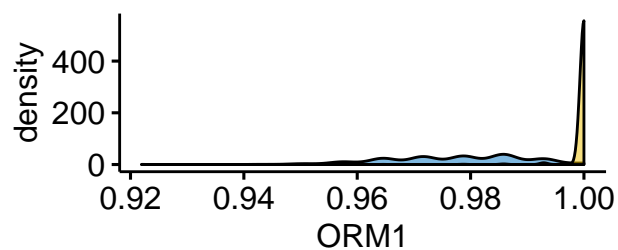

Value : Specificity for ORM1

Label ■ model ■ permuted data

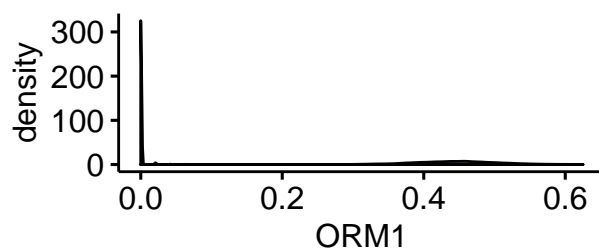

Value : Precision for ORM1

Label ■ model ■ permuted data

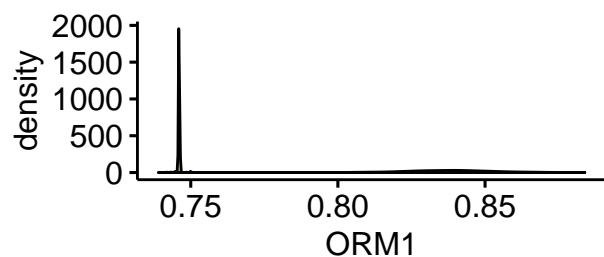

Value : Accuracy for ORM1

Label ■ model ■ permuted data

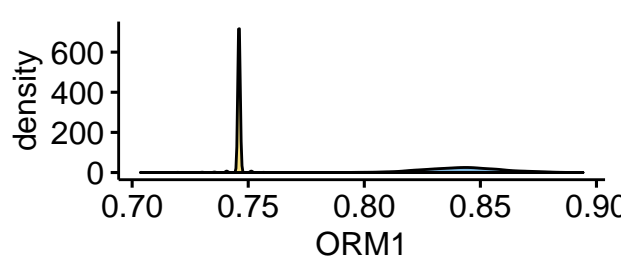

```
## TableGrob (2 x 2) "arrange": 4 grobs
##   z      cells   name      grob
## 1 1 (1-1,1-1) arrange gtable[layout]
## 2 2 (1-1,2-2) arrange gtable[layout]
## 3 3 (2-2,1-1) arrange gtable[layout]
## 4 4 (2-2,2-2) arrange gtable[layout]
```

Value : Sensitivity for HHEX

Label ■ model ■ permuted data

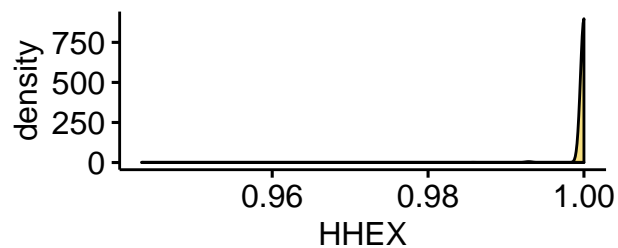

Value : Specificity for HHEX

Label ■ model ■ permuted data

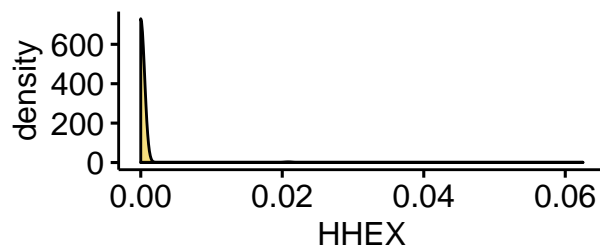

Value : Precision for HHEX

Label ■ model ■ permuted data

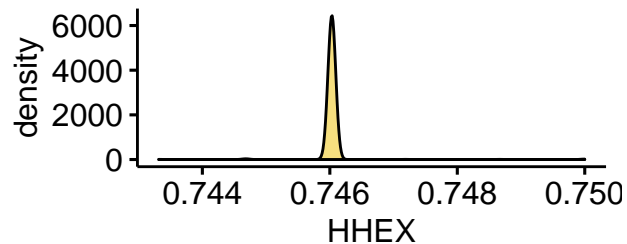

Value : Accuracy for HHEX

Label ■ model ■ permuted data

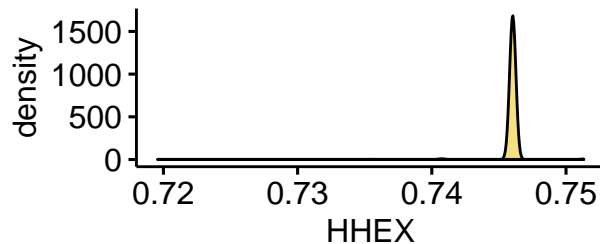

```
## TableGrob (2 x 2) "arrange": 4 grobs
##   z      cells   name      grob
## 1 1 (1-1,1-1) arrange gtable[layout]
## 2 2 (1-1,2-2) arrange gtable[layout]
## 3 3 (2-2,1-1) arrange gtable[layout]
## 4 4 (2-2,2-2) arrange gtable[layout]
```

Value : Sensitivity for AL0223

Label ■ model ■ permuted data

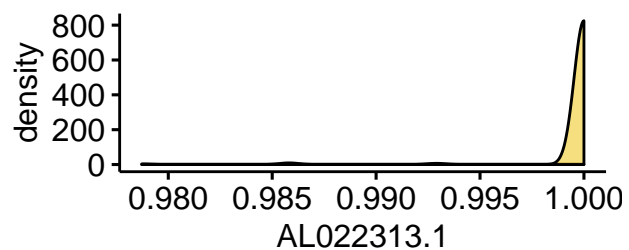

Value : Specificity for AL0223

Label ■ model ■ permuted data

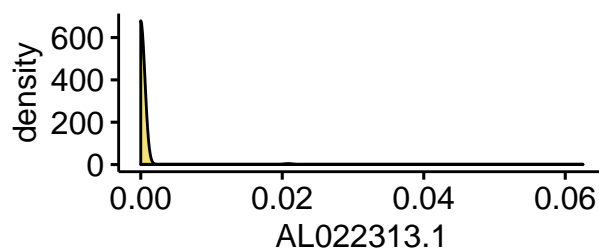

Value : Precision for AL0223

Label ■ model ■ permuted data

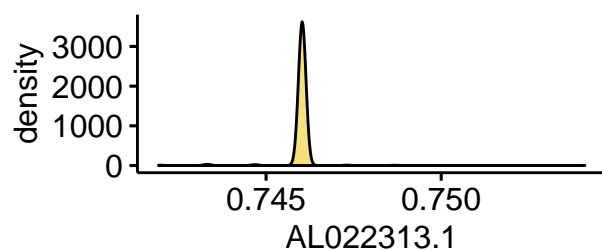

Value : Accuracy for AL0223

Label ■ model ■ permuted data

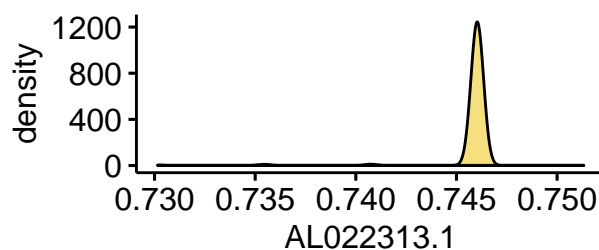

```
## TableGrob (2 x 2) "arrange": 4 grobs
##   z      cells   name      grob
## 1 1 (1-1,1-1) arrange gtable[layout]
## 2 2 (1-1,2-2) arrange gtable[layout]
## 3 3 (2-2,1-1) arrange gtable[layout]
## 4 4 (2-2,2-2) arrange gtable[layout]
```

Value : Sensitivity for ARRDC

Label ■ model ■ permuted data

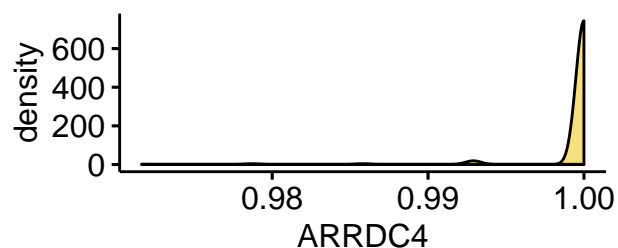

Value : Specificity for ARRDC

Label ■ model ■ permuted data

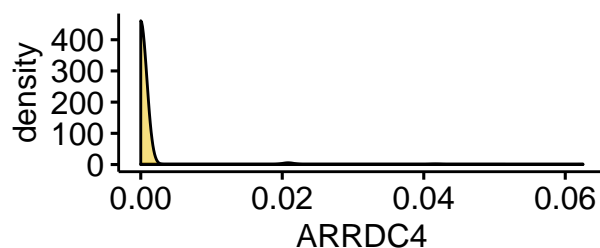

Value : Precision for ARRDC

Label ■ model ■ permuted data

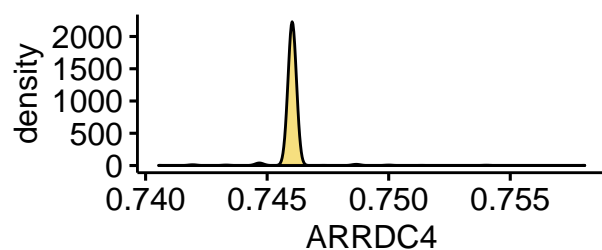

Value : Accuracy for ARRDC

Label ■ model ■ permuted data

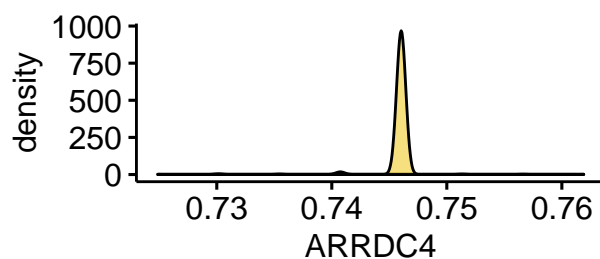

```
## TableGrob (2 x 2) "arrange": 4 grobs
##   z      cells   name      grob
## 1 1 (1-1,1-1) arrange gtable[layout]
## 2 2 (1-1,2-2) arrange gtable[layout]
## 3 3 (2-2,1-1) arrange gtable[layout]
## 4 4 (2-2,2-2) arrange gtable[layout]
```

Value : Sensitivity for MERTK

Label ■ model ■ permuted data

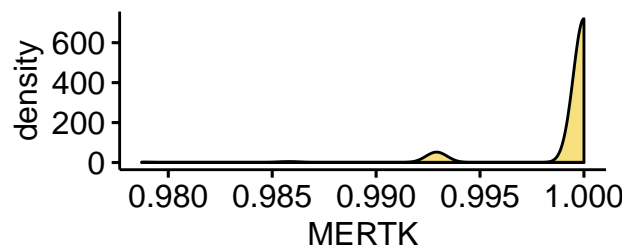

Value : Specificity for MERTK

Label ■ model ■ permuted data

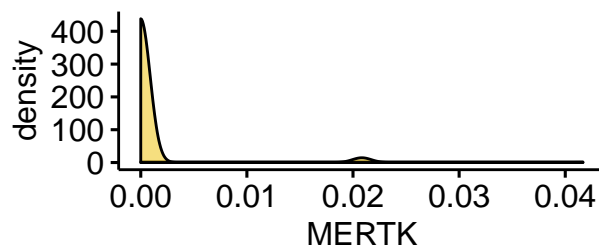

Value : Precision for MERTK

Label ■ model ■ permuted data

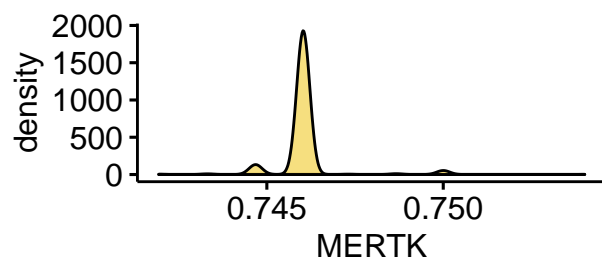

Value : Accuracy for MERTK

Label ■ model ■ permuted data

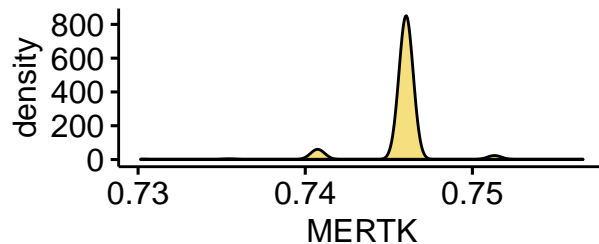

```
## TableGrob (2 x 2) "arrange": 4 grobs
##   z      cells   name      grob
## 1 1 (1-1,1-1) arrange gtable[layout]
## 2 2 (1-1,2-2) arrange gtable[layout]
## 3 3 (2-2,1-1) arrange gtable[layout]
## 4 4 (2-2,2-2) arrange gtable[layout]
```

Value : Sensitivity for RTN2

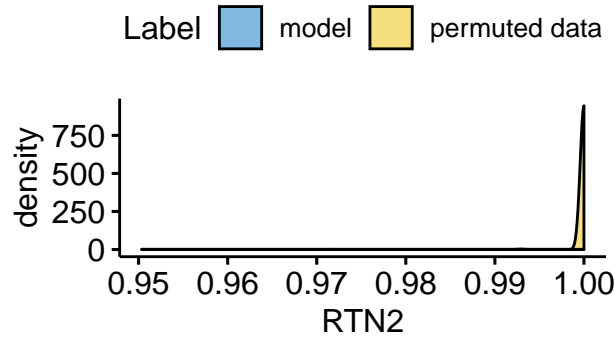

Value : Specificity for RTN2

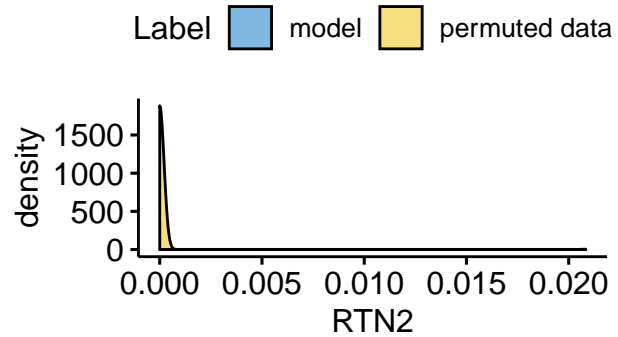

Value : Precision for RTN2

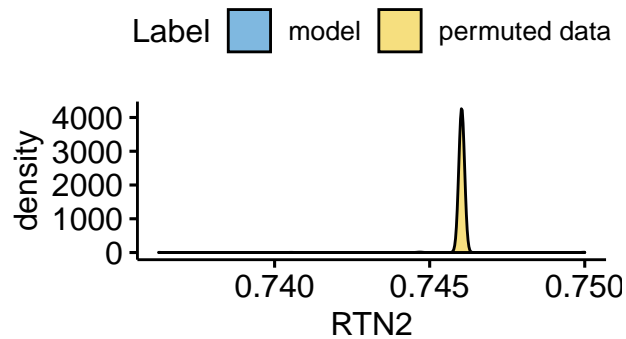

Value : Accuracy for RTN2

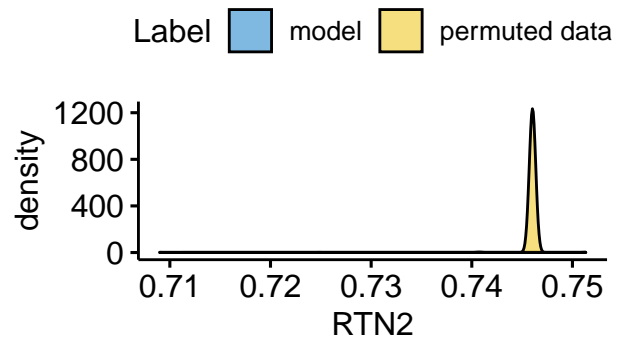

```
## TableGrob (2 x 2) "arrange": 4 grobs
##   z      cells   name      grob
## 1 1 (1-1,1-1) arrange gtable[layout]
## 2 2 (1-1,2-2) arrange gtable[layout]
## 3 3 (2-2,1-1) arrange gtable[layout]
## 4 4 (2-2,2-2) arrange gtable[layout]
```

```
#
```

```
Meanq<-data.frame(multipleAUC$Means,multipleAUCR$Means)
MA<-data.frame(Mono=t(multipleAUC[1:dim(multipleAUC)[2]-1]))
MA["Label"]<-as.factor(c(rep("model",dim(MA)[1])))
MAR<-data.frame(Mono=t(multipleAUCR[1:dim(multipleAUCR)[2]-1]))
MAR["Label"]<-as.factor(c(rep("permuted data",dim(MAR)[1])))
Mono<-rbind(MA,MAR)
pp<-ggdensity(Mono, x = "Mono", fill = "Label", palette = "jco")+geom_vline(xintercept=Meanq[1,1],linetype="solid",color="black",show.legend = FALSE)
print(pp+geom_vline(xintercept=Meanq[1,2],linetype = 2,color="black",show.legend = TRUE))
```

# AUC curve of GLM Multiple c("DEFT1P", "MSRB3", "ORM1", "HHEX")

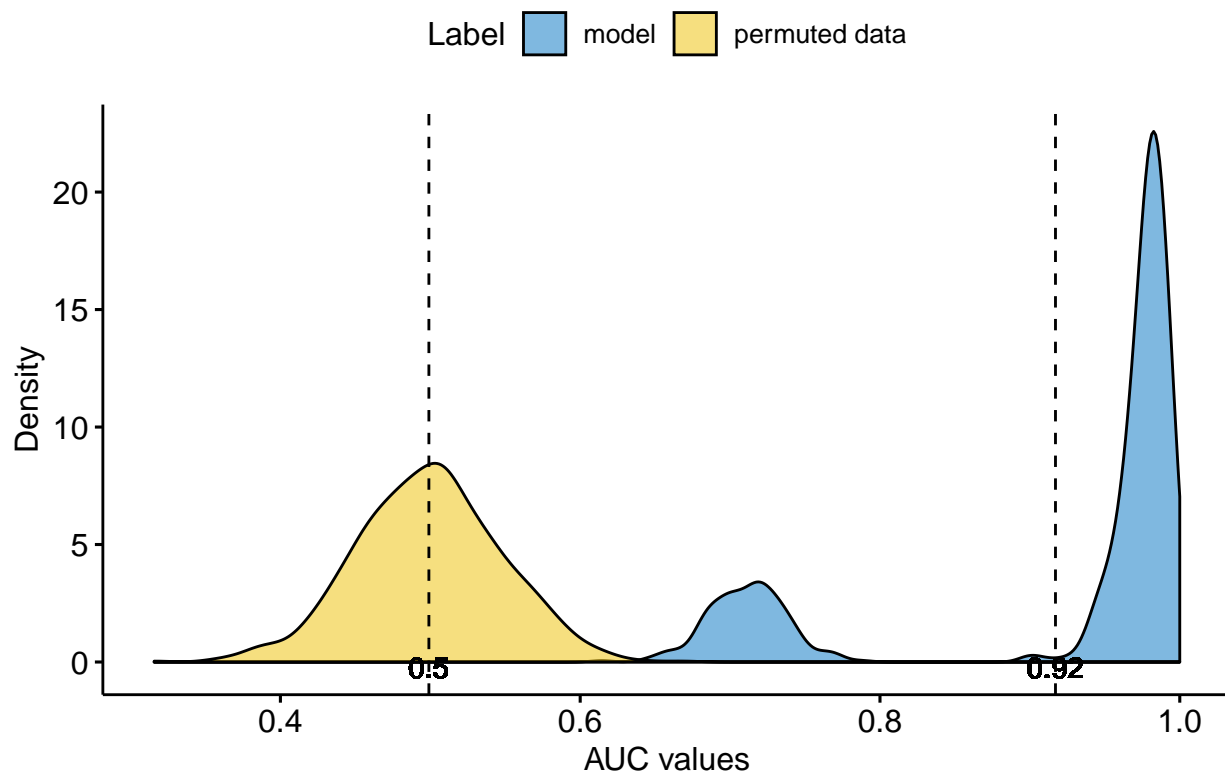

```
Meanq<-data.frame(multipleAUCNB$Means,multipleAUCNBR$Means)
MA<-data.frame(Mono=t(multipleAUCNB[1:dim(multipleAUCNB)[2]-1]))
MA["Label"]<-as.factor(c(rep("model",dim(MA)[1])))
MAR<-data.frame(Mono=t(multipleAUCNBR[1:dim(multipleAUCNBR)[2]-1]))
MAR["Label"]<-as.factor(c(rep("permuted data",dim(MAR)[1])))
Mono<-rbind(MA,MAR)
pp<-ggdensity(Mono, x = "Mono", fill = "Label", palette = "jco")+geom_vline(xintercept=Meanq[1,1],linetype=2,color="black",show.legend = TRUE)
print(pp+geom_vline(xintercept=Meanq[1,2],linetype = 2,color="black",show.legend = TRUE))
```

## AUC curve of NB Multiple c("DEFT1P", "MSRB3", "ORM1", "HHEX", "

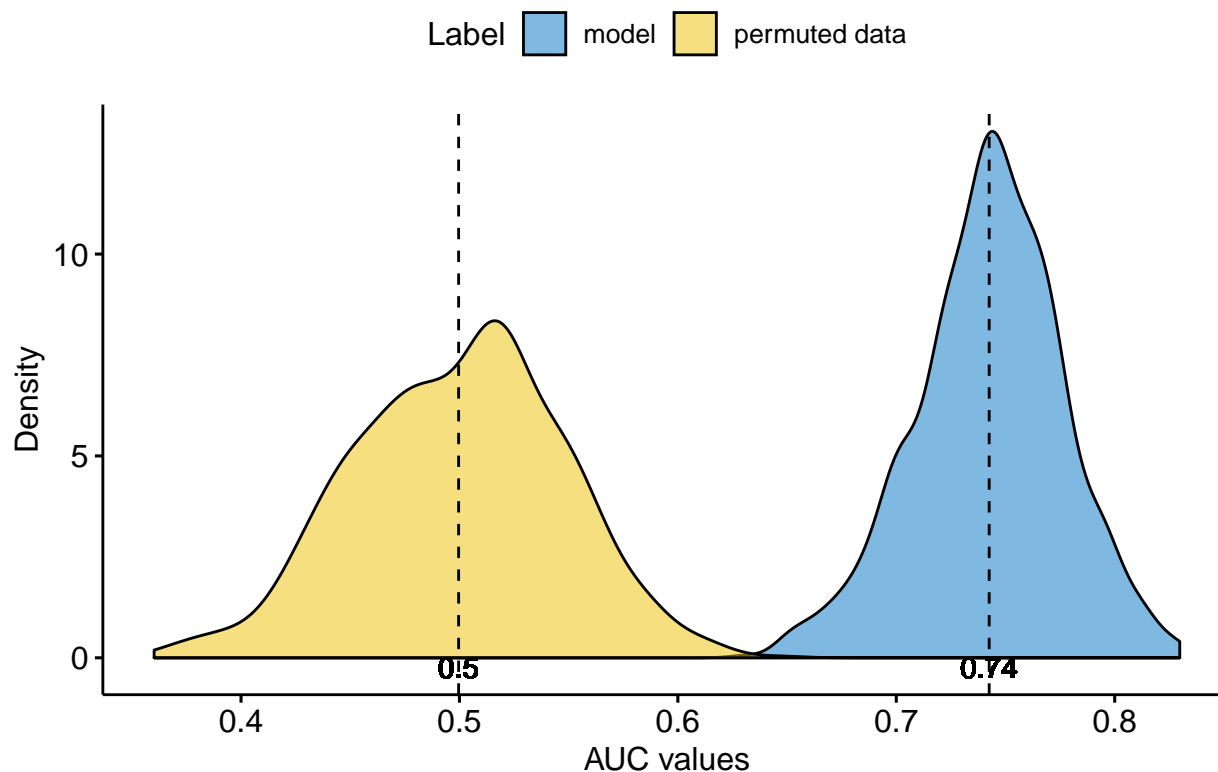

```
ee<-regex(names, ".")
```

```
Final<-data.frame(MultiNB=t(multipleAUCNB),MultiNBRand=t(multipleAUCNBR),Multi=t(multipleAUC),MultiRand=t(multipleAUCR))
FinalMeans<-data.frame(MultiNB=multipleAUCNB$Means,MultiNBRand=multipleAUCNBR$Means,Multi=multipleAUC$Means,MultiRand=multipleAUCR$Means)
```

```
##### End Block 7
```

```
genes_to_network <- colnames(Betas_select)[-length(colnames(Betas_select))]
genes_to_networkStrict <- colnames(Betas_select2)[-length(colnames(Betas_select2))]
```

```
sink("genes_to_network.txt")
cat("Beta_Select_Intial")
```

```
## Beta_Select_Intial
```

```
cat("\n")
```

```
cat(genes_to_network, sep = "\n")
```

```
## LCN2
## CRISP3
## CAMP
## HHEX
## HOXA9
```

```
## KLF10
## SOX4
## BMP1
## TRIO
## SOCS5
## MAP3K7CL
## MAPK12
## DEFT1P
## CD8B2
## FSCN1
## DNAH10
## CYP4F3
## HOXA10
## EEF1A1
## C6orf48
## PNKD
## SLC17A9
## ORM1
## MARK4
## MMP9
## ASPH
## GAS5
## OLFM4
## VPREB3
## IL7R
## NETO2
## C5
## UBE2E2
## TUBB1
## MSRB3
## ORM2
## SNX33
## CFD
## RAB37
## RTN2
## ZNF469
## FLT3
## RPL22
## FBXL19
## IGF2BP2
## ERCC1
## CD160
## AL022313.1
## CD8B
## SLC25A21
## ITPR1
## MERTK
## ALOX12
## ARRDC4
```

```
cat("Beta_Select_Threshold")
```

```
## Beta_Select_Threshold
```

```
cat("\n")  
  
cat(genes_to_networkStrict, sep = "\n")  
  
## DEFT1P  
## MSRB3  
## ORM1  
## HHEX  
## AL022313.1  
## ARRDC4  
## MERTK  
## RTN2  
  
sink()
```
